# Supplementary material for: Student health behavior and academic performance
Source: PeerJ. 2021 Apr 16;9:e11107. doi: 10.7717/peerj.11107 (PMC8054760; doi:10.7717/peerj.11107)
Supplement: Supplemental Information 2 [file peerj-09-11107-s002.xlsx]

## Sheet: Demographics
Current GPA	Biological sex	Student population
3.94	Female	Freshman
3.75	Female	Freshman
3.75	Female	Freshman
3.4	Female	Freshman
3.2	Female	Freshman
3.3	Female	Freshman
4	Female	Freshman
4	Female	Freshman
3.69	Female	Freshman
4	Female	Freshman
3.8	Female	Freshman
3.13	Female	Freshman
3.91	Female	Freshman
3.47	Female	Freshman
2.8	Female	Freshman
3.3	Female	Freshman
3.6	Female	Freshman
2.7	Female	Freshman
4	Female	Freshman
3.95	Female	Freshman
3.45	Female	Freshman
4	Female	Freshman
3.7	Female	Freshman
3.2	Female	Freshman
3.8	Female	Freshman
3.9	Female	Freshman
3.75	Female	Freshman
3.9	Female	Freshman
3.8	Female	Freshman
3.7	Female	Freshman
3.266	Female	Freshman
2.3	Female	Freshman
3.45	Female	Freshman
1.7	Female	Freshman
3.6	Female	Freshman
2.5	Female	Freshman
3.5	Female	Freshman
1.65	Female	Freshman
3.75	Female	Freshman
3.6	Female	Freshman
4	Female	Freshman
3.75	Female	Freshman
3.3	Female	Freshman
3.7	Female	Freshman
2.1	Female	Freshman
3.4	Female	Freshman
3.6	Female	Freshman
3.7	Female	Freshman
3.2	Female	Freshman
3.83	Female	Freshman
2.7	Female	Freshman
3.6	Female	Freshman
3	Female	Freshman
3.2	Female	Freshman
4	Female	Freshman
3.8	Female	Freshman
3.5	Female	Freshman
2.6	Female	Freshman
3.9	Female	Freshman
3.5	Female	Freshman
4.48	Female	Freshman
4	Female	Freshman
4	Female	Freshman
2.5	Female	Freshman
3.8	Female	Freshman
4	Female	Freshman
4	Female	Freshman
3.56	Female	Freshman
4	Female	Freshman
4	Female	Freshman
2.75	Female	Freshman
4	Female	Freshman
4	Female	Freshman
3.1	Female	Freshman
3.7	Female	Freshman
3.5	Female	Freshman
3.75	Female	Freshman
4	Female	Freshman
4	Female	Freshman
3	Female	Freshman
3.5	Female	Freshman
3.85	Female	Freshman
3.45	Female	Freshman
3.8	Female	Freshman
4	Female	Freshman
2.5	Female	Freshman
3.8	Female	Freshman
3.2	Female	Freshman
3.6	Female	Freshman
3.94	Female	Freshman
4	Female	Freshman
2.7	Female	Freshman
3.75	Female	Freshman
3	Female	Freshman
4	Female	Freshman
4	Female	Freshman
3.5	Female	Freshman
4	Female	Freshman
3	Female	Freshman
3.01	Female	Freshman
4	Female	Freshman
3.8	Female	Freshman
3.6	Female	Freshman
3	Female	Freshman
3	Female	Freshman
3.55	Female	Freshman
3.3	Female	Freshman
3.3	Female	Freshman
3.5	Female	Freshman
3.8	Female	Freshman
4	Female	Freshman
3.34	Female	Freshman
3.8	Female	Freshman
2.8	Female	Freshman
3.82	Female	Freshman
3.8	Female	Freshman
3.6	Female	Freshman
4	Female	Freshman
3.7	Female	Freshman
3.8	Female	Freshman
3.4	Female	Freshman
3.67	Female	Freshman
2.9	Female	Freshman
2.8	Female	Freshman
0.57	Female	Freshman
0.57	Female	Freshman
2.5	Female	Freshman
3.31	Female	Freshman
3.67	Female	Freshman
3.5	Female	Freshman
0.4	Female	Freshman
4	Female	Freshman
1.9	Female	Freshman
3.7	Female	Freshman
3.5	Female	Freshman
3.5	Female	Freshman
2	Female	Freshman
4	Female	Freshman
4	Female	Freshman
3.2	Female	Freshman
3.6	Female	Freshman
4	Female	Freshman
4	Female	Freshman
3.5	Female	Freshman
3.9	Female	Freshman
3.8	Female	Freshman
4	Female	Freshman
4	Female	Freshman
4	Female	Freshman
4	Female	Freshman
3.7	Female	Freshman
3.674	Female	Junior
3.76	Female	Junior
3.927	Female	Junior
3.1	Female	Junior
3.36	Female	Junior
3.4	Female	Junior
3.64	Female	Junior
2.5	Female	Junior
2.5	Female	Junior
3.4	Female	Junior
2.9	Female	Junior
3	Female	Junior
3.5	Female	Junior
2.9	Female	Junior
3.902	Female	Junior
3.4	Female	Junior
3.97	Female	Junior
3.7	Female	Junior
3.4	Female	Junior
3.81	Female	Junior
3.44	Female	Junior
2.9	Female	Junior
3.2	Female	Junior
3.5	Female	Junior
3.4	Female	Junior
3.33	Female	Junior
3.64	Female	Junior
3.52	Female	Junior
3.4	Female	Junior
3.5	Female	Junior
4	Female	Junior
3.2	Female	Junior
3.4	Female	Junior
3.29	Female	Junior
3	Female	Junior
3.36	Female	Junior
2.4	Female	Junior
3.2	Female	Junior
3.83	Female	Junior
2.9	Female	Junior
2.24	Female	Junior
3.47	Female	Junior
3.5	Female	Junior
3.6	Female	Junior
3.8	Female	Junior
2.5	Female	Junior
3.75	Female	Junior
3.6	Female	Junior
3.5	Female	Junior
3.6	Female	Junior
3.3	Female	Junior
3.51	Female	Junior
3.95	Female	Junior
3.5	Female	Junior
3.5	Female	Junior
3.2	Female	Junior
3.75	Female	Junior
3.53	Female	Junior
3.6	Female	Junior
3.8	Female	Junior
3.78	Female	Junior
3.5	Female	Junior
2.9	Female	Junior
3.85	Female	Junior
3.12	Female	Junior
3.22	Female	Junior
3.45	Female	Junior
3	Female	Junior
2.9	Female	Junior
3.6	Female	Junior
3.4	Female	Junior
3.6	Female	Junior
3.72	Female	Junior
3.56	Female	Junior
3.3	Female	Junior
3.7	Female	Junior
2.974	Female	Junior
3.49	Female	Junior
3.8	Female	Junior
3.1	Female	Junior
2.7	Female	Junior
3.8	Female	Junior
3.3	Female	Junior
3.33	Female	Junior
2.87	Female	Junior
3.83	Female	Junior
2.28	Female	Junior
2.75	Female	Junior
3.01	Female	Junior
3.5	Female	Junior
3.5	Female	Junior
3.87	Female	Junior
3.04	Female	Junior
3.44	Female	Junior
3	Female	Junior
2.5	Female	Junior
3.1	Female	Junior
3.3	Female	Junior
3.46	Female	Junior
3.1	Female	Junior
3.23	Female	Junior
3.87	Female	Junior
3.26	Female	Junior
3.5	Female	Junior
3	Female	Junior
4	Female	Junior
3.04	Female	Junior
3.7	Female	Junior
3.9	Female	Junior
3.94	Female	Junior
3.4	Female	Junior
3.49	Female	Junior
3.11	Female	Junior
3.2	Female	Junior
3.49	Female	Junior
3.01	Female	Junior
3.45	Female	Junior
2.74	Female	Junior
3.5	Female	Junior
3.5	Female	Junior
3.927	Female	Junior
3.61	Female	Junior
3.84	Female	Junior
3.15	Female	Junior
3.81	Female	Junior
3.07	Female	Junior
3.7	Female	Junior
2.5	Female	Junior
3.8	Female	Senior
2.9	Female	Senior
3.43	Female	Senior
3.4	Female	Senior
3.5	Female	Senior
3.4	Female	Senior
2.6	Female	Senior
3.6	Female	Senior
3.96	Female	Senior
3.97	Female	Senior
3.1	Female	Senior
4	Female	Senior
3.95	Female	Senior
4	Female	Senior
2.99	Female	Senior
4	Female	Senior
3	Female	Senior
3.4	Female	Senior
3.9	Female	Senior
3.5	Female	Senior
3.5	Female	Senior
3.92	Female	Senior
3.57	Female	Senior
3.8	Female	Senior
2.51	Female	Senior
3.2	Female	Senior
3.6	Female	Senior
3.61	Female	Senior
3.86	Female	Senior
3.84	Female	Senior
3.5	Female	Senior
3.92	Female	Senior
3.8	Female	Senior
3.7	Female	Senior
3.3	Female	Senior
3.4	Female	Senior
3.2	Female	Senior
2.75	Female	Senior
3.45	Female	Senior
2.49	Female	Senior
3.3	Female	Senior
4.71	Female	Senior
3.5	Female	Senior
3.76	Female	Senior
3.94	Female	Senior
3.92	Female	Senior
3.86	Female	Senior
3.6	Female	Senior
3.34	Female	Senior
3.56	Female	Senior
2.9	Female	Senior
3.5	Female	Senior
2.7	Female	Senior
2.9	Female	Senior
2.5	Female	Senior
3.1	Female	Senior
3.67	Female	Senior
4	Female	Senior
3.2	Female	Senior
3.1	Female	Senior
2.69	Female	Senior
3.7	Female	Sophomore
3.6	Female	Sophomore
3.6	Female	Sophomore
2.7	Female	Sophomore
4	Female	Sophomore
3.5	Female	Sophomore
3.6	Female	Sophomore
3.1	Female	Sophomore
4	Female	Sophomore
2.9	Female	Sophomore
3.721	Female	Sophomore
3.45	Female	Sophomore
3.6	Female	Sophomore
3.2	Female	Sophomore
3	Female	Sophomore
3.61	Female	Sophomore
4	Female	Sophomore
3.4	Female	Sophomore
2.6	Female	Sophomore
3.36	Female	Sophomore
3.41	Female	Sophomore
3.85	Female	Sophomore
3.2	Female	Sophomore
3.78	Female	Sophomore
3.9	Female	Sophomore
3.25	Female	Sophomore
3.8	Female	Sophomore
3.5	Female	Sophomore
3.8	Female	Sophomore
3.3	Female	Sophomore
3.6	Female	Sophomore
3.2	Female	Sophomore
3.6	Female	Sophomore
3.78	Female	Sophomore
2.6	Female	Sophomore
3.8	Female	Sophomore
3.9	Female	Sophomore
3.11	Female	Sophomore
3.83	Female	Sophomore
3.4	Female	Sophomore
2.52	Female	Sophomore
3.78	Female	Sophomore
3.06	Female	Sophomore
3.893	Female	Sophomore
3.2	Female	Sophomore
3.3	Female	Sophomore
3.9	Female	Sophomore
4	Female	Sophomore
3.2	Female	Sophomore
3.78	Female	Sophomore
2.8	Female	Sophomore
2.89	Female	Sophomore
2	Female	Sophomore
3.31	Female	Sophomore
4	Female	Sophomore
3.4	Female	Sophomore
4	Female	Sophomore
3.3	Female	Sophomore
2.7	Female	Sophomore
3.8	Female	Sophomore
3.25	Female	Sophomore
3.5	Female	Sophomore
2.9	Female	Sophomore
3.24	Female	Sophomore
3.7	Female	Sophomore
3.47	Female	Sophomore
3	Female	Sophomore
3	Female	Sophomore
3.55	Female	Sophomore
3.1	Female	Sophomore
3.532	Female	Sophomore
3.6	Female	Sophomore
3.5	Female	Sophomore
3.5	Female	Sophomore
3.85	Female	Sophomore
3.6	Female	Sophomore
3.5	Female	Sophomore
2.78	Female	Sophomore
3.89	Female	Sophomore
3.2	Female	Sophomore
4	Female	Sophomore
3.11	Female	Sophomore
3.5	Female	Sophomore
3.7	Female	Sophomore
3.1	Female	Sophomore
3.16	Female	Sophomore
3.24	Female	Sophomore
3.37	Female	Sophomore
3.4	Female	Sophomore
3.7	Female	Sophomore
3.45	Female	Sophomore
3.6	Female	Sophomore
3.9	Female	Sophomore
4	Female	Sophomore
4	Female	Sophomore
3	Female	Sophomore
3.1	Female	Sophomore
3.56	Female	Sophomore
3.97	Female	Sophomore
4	Female	Sophomore
3.2	Female	Sophomore
3.4	Female	Sophomore
2.48	Female	Sophomore
3.01	Female	Sophomore
3.3	Female	Sophomore
3.53	Female	Sophomore
3.5	Female	Sophomore
2.9	Female	Sophomore
3.8	Female	Sophomore
2.48	Female	Sophomore
2.9	Female	Sophomore
3.91	Female	Sophomore
4	Female	Sophomore
2.3	Female	Sophomore
3.8	Female	Sophomore
2.7	Female	Sophomore
3.5	Female	Sophomore
3.8	Female	Sophomore
3.75	Female	Sophomore
3.8	Female	Sophomore
1.9	Female	Sophomore
3	Female	Sophomore
3.8	Female	Sophomore
2.8	Female	Sophomore
3.7	Female	Sophomore
3	Female	Sophomore
3.477	Female	Sophomore
3.46	Female	Sophomore
3.77	Female	Sophomore
3.5	Female	Sophomore
3.5	Female	Sophomore
2.8	Female	Sophomore
4	Female	Sophomore
4	Female	Sophomore
3.78	Female	Sophomore
2.76	Female	Sophomore
3.6	Female	Sophomore
3.4	Female	Sophomore
2.05	Female	Sophomore
3.235	Female	Sophomore
3.6	Female	Sophomore
2.9	Female	Sophomore
3.94	Male	Freshman
3	Male	Freshman
3.47	Male	Freshman
3.1	Male	Freshman
0.94	Male	Freshman
3.2	Male	Freshman
3.1	Male	Freshman
3.7	Male	Freshman
3	Male	Freshman
3.4	Male	Freshman
3.7	Male	Freshman
3	Male	Freshman
4	Male	Freshman
4	Male	Freshman
4	Male	Freshman
4	Male	Freshman
3.89	Male	Freshman
3	Male	Freshman
3.8	Male	Freshman
3.7	Male	Freshman
3.75	Male	Freshman
3	Male	Freshman
3	Male	Freshman
3.4	Male	Freshman
4	Male	Freshman
3.3	Male	Freshman
3.4	Male	Freshman
3	Male	Freshman
4	Male	Freshman
4	Male	Freshman
3.9	Male	Freshman
3.15	Male	Freshman
3.23	Male	Freshman
3.5	Male	Freshman
2.67	Male	Freshman
3.575	Male	Freshman
3.5	Male	Freshman
3.67	Male	Freshman
3.7	Male	Freshman
3.51	Male	Junior
2.8	Male	Junior
3.7	Male	Junior
3.3	Male	Junior
3.1	Male	Junior
3.3	Male	Junior
2.8	Male	Junior
3.65	Male	Junior
3.4	Male	Junior
2.9	Male	Junior
3.72	Male	Junior
3	Male	Junior
3	Male	Junior
3	Male	Junior
3.2	Male	Junior
3.3	Male	Junior
3.09	Male	Junior
2.9	Male	Junior
3.12	Male	Junior
3.84	Male	Junior
2.92	Male	Junior
3.6	Male	Junior
3.26	Male	Junior
4	Male	Junior
3.487	Male	Junior
2.7	Male	Junior
3.2	Male	Junior
3.46	Male	Junior
3.94	Male	Junior
2.9	Male	Junior
3.8	Male	Junior
3.94	Male	Junior
3.24	Male	Junior
3.9	Male	Junior
3.72	Male	Junior
4	Male	Senior
3	Male	Senior
3.5	Male	Senior
3.54	Male	Senior
2.9	Male	Senior
3.45	Male	Senior
3.56	Male	Senior
3.3	Male	Senior
3.5	Male	Senior
3.1	Male	Senior
3.75	Male	Senior
2.8	Male	Senior
3.49	Male	Senior
3.82	Male	Senior
3.7	Male	Senior
3.82	Male	Senior
3.2	Male	Senior
3	Male	Senior
4	Male	Senior
3.98	Male	Sophomore
2.7	Male	Sophomore
2.4	Male	Sophomore
3.75	Male	Sophomore
2.6	Male	Sophomore
3.73	Male	Sophomore
3.76	Male	Sophomore
2.91	Male	Sophomore
3.67	Male	Sophomore
3.668	Male	Sophomore
3.83	Male	Sophomore
2.6	Male	Sophomore
2.68	Male	Sophomore
2.7	Male	Sophomore
2.54	Male	Sophomore
3.05	Male	Sophomore
3.4	Male	Sophomore
3.75	Male	Sophomore
3.5	Male	Sophomore
3.9	Male	Sophomore
3.76	Male	Sophomore
2.7	Male	Sophomore
3.5	Male	Sophomore
2.68	Male	Sophomore
3.9	Male	Sophomore
2.8	Male	Sophomore
2.8	Male	Sophomore
3.09	Male	Sophomore
2.8	Male	Sophomore
2.5	Male	Sophomore
2.45	Male	Sophomore
2.79	Male	Sophomore
3	Male	Sophomore
3.94	Male	Sophomore
3.76	Male	Sophomore
3.63	Male	Sophomore
3.5	Male	Sophomore
2.89	Male	Sophomore
3.23	Male	Sophomore

## Sheet: Sleep
Current GPA	Hours of sleep	Time going to bed	Wake up time
3.4	10 or more hours	Between 10pm and 12am	Between 10am and 12pm
3.2	10 or more hours	After 2am	After 12pm
3.1	10 or more hours	After 2am	Between 10am and 12pm
2.6	10 or more hours	Between 12am and 2am	Between 8am and 10am
3.75	10 or more hours	Between 10pm and 12am	Between 8am and 10am
3.45	4 hours or less	After 2am	Between 10am and 12pm
3.7	4 hours or less	After 2am	Between 8am and 10am
2.5	4 hours or less	Between 10pm and 12am	Before 6am
2.9	4 hours or less	After 2am	Between 6am and 8am
2.28	4 hours or less	Between 12am and 2am	Between 6am and 8am
2.9	4 hours or less	Between 8pm and 10pm	Before 6am
3.2	4 hours or less	Between 12am and 2am	Between 6am and 8am
3.5	4 hours or less	After 2am	Between 6am and 8am
2.9	4 hours or less	Between 10pm and 12am	Before 6am
3.06	4 hours or less	After 2am	Between 10am and 12pm
4	4 hours or less	Between 12am and 2am	Between 6am and 8am
3.4	4 hours or less	After 2am	Between 10am and 12pm
2.48	4 hours or less	Between 10pm and 12am	Between 8am and 10am
2.9	4 hours or less	After 2am	Between 8am and 10am
2.48	4 hours or less	Between 10pm and 12am	Between 8am and 10am
3.235	4 hours or less	Between 12am and 2am	Between 6am and 8am
3.6	4 hours or less	Between 12am and 2am	Between 6am and 8am
3.2	4 hours or less	Between 10pm and 12am	Between 6am and 8am
3.1	4 hours or less	After 2am	Between 6am and 8am
3.8	4 hours or less	After 2am	Between 8am and 10am
2.9	4 hours or less	Between 12am and 2am	Between 6am and 8am
2.7	4 hours or less	After 2am	Between 8am and 10am
3.13	5 hours	Between 12am and 2am	Between 8am and 10am
3.3	5 hours	Between 12am and 2am	Between 8am and 10am
3.2	5 hours	Between 10pm and 12am	Between 8am and 10am
3.45	5 hours	Between 12am and 2am	Between 6am and 8am
1.65	5 hours	After 2am	Between 8am and 10am
4	5 hours	Between 10pm and 12am	Between 6am and 8am
3.9	5 hours	Between 10pm and 12am	Between 6am and 8am
3.85	5 hours	Between 10pm and 12am	Before 6am
3.8	5 hours	Between 12am and 2am	Between 8am and 10am
3.2	5 hours	After 2am	Between 8am and 10am
3.94	5 hours	After 2am	Between 10am and 12pm
2.7	5 hours	Between 12am and 2am	Between 8am and 10am
3	5 hours	Between 10pm and 12am	Before 6am
3	5 hours	Between 12am and 2am	Between 6am and 8am
3.8	5 hours	After 2am	Between 6am and 8am
3	5 hours	Between 12am and 2am	Between 8am and 10am
3.8	5 hours	Between 10pm and 12am	Between 6am and 8am
3.8	5 hours	Between 12am and 2am	Between 6am and 8am
0.57	5 hours	Between 12am and 2am	Between 8am and 10am
0.57	5 hours	After 2am	Between 8am and 10am
4	5 hours	Between 12am and 2am	Between 8am and 10am
3.5	5 hours	Between 10pm and 12am	Before 6am
4	5 hours	After 2am	Between 8am and 10am
3.2	5 hours	Between 12am and 2am	Between 6am and 8am
3.6	5 hours	Between 12am and 2am	Between 6am and 8am
4	5 hours	Between 12am and 2am	Before 6am
2.5	5 hours	Between 12am and 2am	Between 6am and 8am
3.5	5 hours	Between 12am and 2am	Between 6am and 8am
4	5 hours	Between 12am and 2am	Between 8am and 10am
3.2	5 hours	Between 12am and 2am	Between 6am and 8am
3	5 hours	Between 12am and 2am	Between 8am and 10am
2.24	5 hours	Between 12am and 2am	Between 6am and 8am
2.5	5 hours	Between 12am and 2am	Between 8am and 10am
3.5	5 hours	Between 12am and 2am	Between 8am and 10am
3.51	5 hours	Between 12am and 2am	Between 8am and 10am
3.5	5 hours	Between 10pm and 12am	Before 6am
3.75	5 hours	Between 12am and 2am	Between 6am and 8am
3.78	5 hours	After 2am	Between 8am and 10am
3.85	5 hours	Between 12am and 2am	Between 6am and 8am
3.22	5 hours	Between 10pm and 12am	Between 6am and 8am
3.45	5 hours	Between 8pm and 10pm	Between 6am and 8am
3.56	5 hours	Between 12am and 2am	Between 6am and 8am
3.1	5 hours	Between 12am and 2am	Between 6am and 8am
3.8	5 hours	Between 12am and 2am	Before 6am
3.33	5 hours	After 2am	Between 10am and 12pm
3.04	5 hours	Between 12am and 2am	Between 6am and 8am
3.44	5 hours	Between 10pm and 12am	Before 6am
3	5 hours	Between 10pm and 12am	Between 6am and 8am
3.23	5 hours	Between 10pm and 12am	Between 6am and 8am
3.87	5 hours	Between 10pm and 12am	Between 6am and 8am
3.7	5 hours	Between 12am and 2am	Between 8am and 10am
3.9	5 hours	After 2am	Between 8am and 10am
3.01	5 hours	Between 12am and 2am	Between 8am and 10am
3.45	5 hours	After 2am	Between 8am and 10am
3.84	5 hours	Between 12am and 2am	Before 6am
3.4	5 hours	After 2am	Between 6am and 8am
3.6	5 hours	Between 12am and 2am	Between 6am and 8am
4	5 hours	Between 12am and 2am	Between 6am and 8am
3.86	5 hours	Between 10pm and 12am	Before 6am
3.5	5 hours	Between 12am and 2am	Between 8am and 10am
3.1	5 hours	Between 12am and 2am	Between 6am and 8am
3.67	5 hours	Between 12am and 2am	Between 6am and 8am
3.2	5 hours	Between 12am and 2am	Between 6am and 8am
3.8	5 hours	Between 12am and 2am	Between 6am and 8am
3.4	5 hours	Between 10pm and 12am	Between 6am and 8am
3.3	5 hours	Between 12am and 2am	Between 8am and 10am
2.7	5 hours	Between 10pm and 12am	Between 6am and 8am
3.7	5 hours	Between 12am and 2am	Between 6am and 8am
3.5	5 hours	Between 10pm and 12am	Before 6am
3.5	5 hours	Between 12am and 2am	Between 8am and 10am
3.7	5 hours	Between 10pm and 12am	Between 6am and 8am
3.3	5 hours	Between 10pm and 12am	Between 6am and 8am
3.8	5 hours	Between 10pm and 12am	Between 6am and 8am
1.9	5 hours	After 2am	Between 8am and 10am
3.7	5 hours	After 2am	Between 10am and 12pm
3	5 hours	Between 12am and 2am	Between 6am and 8am
2.05	5 hours	Between 12am and 2am	Between 6am and 8am
3.1	5 hours	Between 10pm and 12am	Between 6am and 8am
3.8	5 hours	After 2am	Between 10am and 12pm
3.4	5 hours	Between 12am and 2am	Between 6am and 8am
3.3	5 hours	Between 12am and 2am	Before 6am
2.8	5 hours	Between 12am and 2am	Between 6am and 8am
3.6	5 hours	Between 12am and 2am	Between 10am and 12pm
3.94	5 hours	After 2am	Between 10am and 12pm
3.94	5 hours	Between 10pm and 12am	Between 6am and 8am
3.72	5 hours	Between 12am and 2am	Between 6am and 8am
3	5 hours	Between 10pm and 12am	Before 6am
3.5	5 hours	Between 10pm and 12am	Before 6am
3.49	5 hours	Between 12am and 2am	Between 6am and 8am
3	5 hours	After 2am	Between 8am and 10am
2.91	5 hours	Between 12am and 2am	Between 6am and 8am
2.54	5 hours	Between 12am and 2am	Between 8am and 10am
3.05	5 hours	After 2am	Between 6am and 8am
2.7	5 hours	After 2am	Between 10am and 12pm
2.68	5 hours	After 2am	Between 6am and 8am
3.9	5 hours	After 2am	Between 8am and 10am
2.45	5 hours	After 2am	Between 8am and 10am
3.23	5 hours	Between 12am and 2am	Between 6am and 8am
3.94	6 hours	Between 12am and 2am	Between 8am and 10am
3.69	6 hours	Between 12am and 2am	Between 6am and 8am
3.8	6 hours	Between 12am and 2am	Between 8am and 10am
3.47	6 hours	Between 10pm and 12am	Between 8am and 10am
3.8	6 hours	Between 12am and 2am	Between 8am and 10am
3.7	6 hours	Between 12am and 2am	Between 8am and 10am
3.266	6 hours	Between 12am and 2am	Between 8am and 10am
1.7	6 hours	Between 12am and 2am	Between 6am and 8am
3.75	6 hours	Between 12am and 2am	Between 8am and 10am
2.1	6 hours	Between 10pm and 12am	Between 8am and 10am
3.4	6 hours	Between 12am and 2am	Between 6am and 8am
3.6	6 hours	Between 12am and 2am	Between 6am and 8am
2.7	6 hours	Between 12am and 2am	Between 8am and 10am
3	6 hours	Between 10pm and 12am	Between 8am and 10am
3.5	6 hours	Between 10pm and 12am	Between 6am and 8am
2.6	6 hours	After 2am	Between 10am and 12pm
4.48	6 hours	Between 12am and 2am	Between 8am and 10am
4	6 hours	Between 10pm and 12am	Between 6am and 8am
3.56	6 hours	Between 10pm and 12am	Between 8am and 10am
4	6 hours	Between 12am and 2am	Between 6am and 8am
2.75	6 hours	Between 10pm and 12am	Between 6am and 8am
4	6 hours	After 2am	Between 8am and 10am
3.5	6 hours	Between 12am and 2am	Between 8am and 10am
3.8	6 hours	Between 12am and 2am	Between 6am and 8am
4	6 hours	Between 10pm and 12am	Between 6am and 8am
3.6	6 hours	Between 10pm and 12am	Between 6am and 8am
4	6 hours	Between 10pm and 12am	Between 6am and 8am
3.5	6 hours	Between 10pm and 12am	Between 8am and 10am
4	6 hours	Between 12am and 2am	Between 6am and 8am
3.6	6 hours	Between 10pm and 12am	Between 8am and 10am
3.55	6 hours	After 2am	Between 8am and 10am
3.5	6 hours	Between 12am and 2am	Between 6am and 8am
4	6 hours	Between 10pm and 12am	Between 8am and 10am
3.8	6 hours	Between 12am and 2am	Between 8am and 10am
3.6	6 hours	Between 12am and 2am	Between 6am and 8am
4	6 hours	Between 12am and 2am	Between 6am and 8am
3.4	6 hours	Between 12am and 2am	Between 6am and 8am
3.67	6 hours	Between 12am and 2am	Between 8am and 10am
2.9	6 hours	Between 10pm and 12am	Between 6am and 8am
2.5	6 hours	Between 12am and 2am	Between 8am and 10am
3.67	6 hours	Between 12am and 2am	Between 8am and 10am
3.5	6 hours	Between 10pm and 12am	Before 6am
0.4	6 hours	Between 12am and 2am	Between 8am and 10am
3.7	6 hours	Between 10pm and 12am	Between 6am and 8am
3.5	6 hours	Between 12am and 2am	Between 6am and 8am
4	6 hours	Between 12am and 2am	Between 8am and 10am
3.8	6 hours	Between 8pm and 10pm	Between 6am and 8am
4	6 hours	Between 10pm and 12am	Before 6am
4	6 hours	Between 10pm and 12am	Between 6am and 8am
3.76	6 hours	After 2am	Between 8am and 10am
3.1	6 hours	Between 12am and 2am	Between 8am and 10am
3.4	6 hours	Between 10pm and 12am	Between 8am and 10am
3.4	6 hours	Between 12am and 2am	Between 8am and 10am
3.81	6 hours	Between 10pm and 12am	Between 6am and 8am
3.64	6 hours	Between 10pm and 12am	Between 8am and 10am
3.4	6 hours	After 2am	Between 10am and 12pm
3.29	6 hours	Between 10pm and 12am	Between 6am and 8am
3.83	6 hours	Between 12am and 2am	Between 8am and 10am
3.47	6 hours	Between 12am and 2am	Between 8am and 10am
3.5	6 hours	Between 12am and 2am	Between 8am and 10am
3.6	6 hours	Between 12am and 2am	Between 6am and 8am
3.3	6 hours	Between 8pm and 10pm	Before 6am
3.5	6 hours	Between 10pm and 12am	Before 6am
3.2	6 hours	Between 10pm and 12am	Between 6am and 8am
3.6	6 hours	Between 12am and 2am	Between 8am and 10am
3.8	6 hours	Between 12am and 2am	Between 8am and 10am
2.9	6 hours	Between 12am and 2am	Between 8am and 10am
3	6 hours	Between 12am and 2am	Between 6am and 8am
3.72	6 hours	Between 12am and 2am	Between 8am and 10am
3.7	6 hours	Between 10pm and 12am	Before 6am
3.49	6 hours	Between 10pm and 12am	Between 6am and 8am
3.8	6 hours	Between 10pm and 12am	Before 6am
3.3	6 hours	Between 12am and 2am	Between 6am and 8am
3.83	6 hours	Between 10pm and 12am	Between 6am and 8am
3.46	6 hours	Between 12am and 2am	Between 6am and 8am
3.04	6 hours	Between 10pm and 12am	Between 6am and 8am
3.49	6 hours	Between 10pm and 12am	Between 6am and 8am
3.49	6 hours	Between 10pm and 12am	Between 6am and 8am
3.927	6 hours	Between 10pm and 12am	Between 6am and 8am
3.15	6 hours	Between 10pm and 12am	Between 6am and 8am
3.7	6 hours	Between 12am and 2am	Between 8am and 10am
3.8	6 hours	Between 12am and 2am	Between 8am and 10am
3.97	6 hours	Between 10pm and 12am	Between 8am and 10am
2.99	6 hours	Between 10pm and 12am	Between 8am and 10am
3.92	6 hours	Between 10pm and 12am	Before 6am
3.61	6 hours	Between 10pm and 12am	Before 6am
3.84	6 hours	Between 10pm and 12am	Between 6am and 8am
3.4	6 hours	Between 10pm and 12am	Between 8am and 10am
3.2	6 hours	Between 12am and 2am	Between 6am and 8am
3.3	6 hours	Between 12am and 2am	Between 6am and 8am
4.71	6 hours	Between 12am and 2am	Between 6am and 8am
3.76	6 hours	Between 12am and 2am	Between 8am and 10am
3.92	6 hours	Between 10pm and 12am	Before 6am
3.34	6 hours	Between 12am and 2am	Between 6am and 8am
2.5	6 hours	Between 12am and 2am	Between 6am and 8am
3.2	6 hours	Between 12am and 2am	Between 6am and 8am
2.69	6 hours	After 2am	Between 6am and 8am
2.7	6 hours	Between 10pm and 12am	Between 6am and 8am
3.5	6 hours	Between 12am and 2am	Between 8am and 10am
4	6 hours	Between 12am and 2am	Between 6am and 8am
3.45	6 hours	Between 12am and 2am	Between 6am and 8am
3.6	6 hours	Between 12am and 2am	Between 8am and 10am
3	6 hours	Between 12am and 2am	Between 8am and 10am
2.6	6 hours	Between 12am and 2am	Between 6am and 8am
3.36	6 hours	Between 12am and 2am	Between 8am and 10am
3.78	6 hours	Between 12am and 2am	Between 6am and 8am
3.25	6 hours	Between 10pm and 12am	Between 6am and 8am
3.8	6 hours	Between 10pm and 12am	Between 6am and 8am
3.3	6 hours	Between 12am and 2am	Between 8am and 10am
3.6	6 hours	Between 12am and 2am	Between 6am and 8am
3.11	6 hours	Between 12am and 2am	Between 8am and 10am
2.52	6 hours	Between 10pm and 12am	Between 10am and 12pm
3.78	6 hours	Between 12am and 2am	Between 6am and 8am
3.2	6 hours	After 2am	Between 8am and 10am
2.8	6 hours	Between 12am and 2am	Between 10am and 12pm
2.89	6 hours	Between 12am and 2am	Between 8am and 10am
2	6 hours	Between 12am and 2am	Between 8am and 10am
3.4	6 hours	Between 12am and 2am	Between 6am and 8am
3.5	6 hours	Between 10pm and 12am	Between 6am and 8am
3.24	6 hours	Between 12am and 2am	Between 8am and 10am
3.6	6 hours	Between 12am and 2am	Between 8am and 10am
3.5	6 hours	Between 10pm and 12am	Between 6am and 8am
3.85	6 hours	Between 10pm and 12am	Before 6am
2.78	6 hours	Between 12am and 2am	Between 6am and 8am
3.89	6 hours	Between 10pm and 12am	Between 10am and 12pm
3.2	6 hours	Between 10pm and 12am	Before 6am
3.5	6 hours	Between 12am and 2am	Between 6am and 8am
3.7	6 hours	Between 10pm and 12am	Between 6am and 8am
3.24	6 hours	Between 12am and 2am	Between 8am and 10am
3.37	6 hours	After 2am	Between 10am and 12pm
3.45	6 hours	Between 12am and 2am	Between 6am and 8am
3.6	6 hours	Between 12am and 2am	Between 6am and 8am
3.9	6 hours	Between 12am and 2am	Between 8am and 10am
4	6 hours	Between 12am and 2am	Between 8am and 10am
3.5	6 hours	Between 12am and 2am	Between 10am and 12pm
3.8	6 hours	Between 10pm and 12am	Between 6am and 8am
3.91	6 hours	Between 10pm and 12am	Between 6am and 8am
2.7	6 hours	Between 12am and 2am	Between 8am and 10am
3.8	6 hours	Between 12am and 2am	Between 8am and 10am
3.5	6 hours	Between 12am and 2am	Between 6am and 8am
4	6 hours	Between 10pm and 12am	Between 6am and 8am
2.76	6 hours	Between 10pm and 12am	Before 6am
3	6 hours	After 2am	After 12pm
3	6 hours	Between 10pm and 12am	Between 6am and 8am
3	6 hours	Between 12am and 2am	Between 8am and 10am
3.7	6 hours	After 2am	Between 10am and 12pm
3	6 hours	Between 12am and 2am	Between 8am and 10am
3	6 hours	Between 10pm and 12am	Between 6am and 8am
3	6 hours	After 2am	Between 10am and 12pm
4	6 hours	After 2am	Between 10am and 12pm
3.15	6 hours	Between 12am and 2am	Between 8am and 10am
3.23	6 hours	Between 12am and 2am	Between 8am and 10am
3.65	6 hours	Between 12am and 2am	Between 8am and 10am
3	6 hours	Between 10pm and 12am	Between 6am and 8am
3	6 hours	Between 10pm and 12am	Between 6am and 8am
3	6 hours	Between 10pm and 12am	Between 6am and 8am
3.2	6 hours	Between 12am and 2am	Between 6am and 8am
3.3	6 hours	Between 10pm and 12am	Between 6am and 8am
3.09	6 hours	Between 12am and 2am	Between 8am and 10am
3.84	6 hours	Between 10pm and 12am	Between 6am and 8am
3.26	6 hours	Between 12am and 2am	Between 6am and 8am
3.487	6 hours	Between 12am and 2am	Between 8am and 10am
3.2	6 hours	Between 12am and 2am	Between 6am and 8am
3.46	6 hours	Between 10pm and 12am	Between 6am and 8am
3.54	6 hours	Between 12am and 2am	Between 6am and 8am
3.3	6 hours	Between 12am and 2am	Between 6am and 8am
3.1	6 hours	After 2am	Between 8am and 10am
3.82	6 hours	Between 12am and 2am	Between 6am and 8am
3.98	6 hours	Between 10pm and 12am	Between 6am and 8am
3.67	6 hours	Between 10pm and 12am	Between 6am and 8am
3.83	6 hours	After 2am	Between 10am and 12pm
3.5	6 hours	Between 12am and 2am	Between 6am and 8am
2.5	6 hours	Between 12am and 2am	Between 10am and 12pm
3	6 hours	Between 12am and 2am	Between 6am and 8am
3.5	6 hours	Between 12am and 2am	Between 8am and 10am
3.75	7 hours	Between 10pm and 12am	Between 6am and 8am
3.2	7 hours	Between 10pm and 12am	Between 8am and 10am
3.95	7 hours	Between 10pm and 12am	Between 6am and 8am
3.45	7 hours	Between 10pm and 12am	Between 8am and 10am
3.7	7 hours	Between 12am and 2am	Between 8am and 10am
3.9	7 hours	Between 12am and 2am	Between 8am and 10am
3.9	7 hours	Between 12am and 2am	Between 8am and 10am
3.8	7 hours	Between 12am and 2am	Between 8am and 10am
2.3	7 hours	Between 10pm and 12am	Before 6am
3.75	7 hours	Between 12am and 2am	Between 8am and 10am
3.3	7 hours	Between 10pm and 12am	Between 8am and 10am
3.7	7 hours	Between 12am and 2am	Between 6am and 8am
3.83	7 hours	Between 10pm and 12am	Between 8am and 10am
3.2	7 hours	Between 8pm and 10pm	Between 6am and 8am
4	7 hours	Between 10pm and 12am	Between 6am and 8am
3.8	7 hours	Between 10pm and 12am	Between 6am and 8am
3.5	7 hours	Between 10pm and 12am	Before 6am
4	7 hours	Between 10pm and 12am	Between 8am and 10am
4	7 hours	Between 10pm and 12am	Between 8am and 10am
4	7 hours	Between 10pm and 12am	Between 6am and 8am
4	7 hours	Between 10pm and 12am	Between 6am and 8am
3.1	7 hours	After 2am	Between 8am and 10am
3.7	7 hours	Between 10pm and 12am	Between 6am and 8am
3.75	7 hours	Between 10pm and 12am	Between 8am and 10am
3	7 hours	Between 8pm and 10pm	Before 6am
3.5	7 hours	Between 12am and 2am	Between 6am and 8am
4	7 hours	Between 10pm and 12am	Between 6am and 8am
4	7 hours	Between 12am and 2am	Between 10am and 12pm
4	7 hours	Between 10pm and 12am	Between 8am and 10am
3.3	7 hours	Between 12am and 2am	Between 8am and 10am
3.3	7 hours	Between 12am and 2am	Between 8am and 10am
3.8	7 hours	Between 8pm and 10pm	Before 6am
3.34	7 hours	Between 10pm and 12am	Between 6am and 8am
2.8	7 hours	Between 12am and 2am	Between 8am and 10am
3.82	7 hours	Between 8pm and 10pm	Between 6am and 8am
2.8	7 hours	Between 10pm and 12am	Between 6am and 8am
3.31	7 hours	Between 10pm and 12am	Between 8am and 10am
1.9	7 hours	Between 12am and 2am	Between 10am and 12pm
2	7 hours	Between 12am and 2am	Between 8am and 10am
4	7 hours	Between 10pm and 12am	Between 6am and 8am
3.5	7 hours	Between 10pm and 12am	Between 8am and 10am
3.9	7 hours	After 2am	Between 10am and 12pm
4	7 hours	Between 10pm and 12am	Between 8am and 10am
4	7 hours	Between 10pm and 12am	Between 8am and 10am
3.7	7 hours	Between 10pm and 12am	Between 8am and 10am
3.36	7 hours	Between 10pm and 12am	Between 6am and 8am
2.9	7 hours	Between 12am and 2am	Between 8am and 10am
3	7 hours	Between 10pm and 12am	Between 8am and 10am
3.4	7 hours	Between 10pm and 12am	Between 8am and 10am
3.97	7 hours	Between 10pm and 12am	Between 6am and 8am
3.7	7 hours	Between 10pm and 12am	Between 6am and 8am
3.4	7 hours	Between 10pm and 12am	Between 8am and 10am
3.4	7 hours	Between 12am and 2am	Between 6am and 8am
3.52	7 hours	Between 10pm and 12am	Between 6am and 8am
3.4	7 hours	Between 12am and 2am	Between 10am and 12pm
3.36	7 hours	Between 12am and 2am	Between 8am and 10am
2.9	7 hours	Between 12am and 2am	Between 8am and 10am
3.6	7 hours	Between 10pm and 12am	Between 6am and 8am
3.8	7 hours	Between 10pm and 12am	Between 8am and 10am
3.75	7 hours	Between 12am and 2am	Between 8am and 10am
3.6	7 hours	Between 12am and 2am	Between 6am and 8am
3.53	7 hours	Between 12am and 2am	Before 6am
3.4	7 hours	Between 10pm and 12am	Between 6am and 8am
3.6	7 hours	After 2am	Between 10am and 12pm
3.3	7 hours	Between 12am and 2am	Between 8am and 10am
2.87	7 hours	Between 12am and 2am	Between 8am and 10am
2.75	7 hours	Between 12am and 2am	Between 8am and 10am
3.01	7 hours	Between 8pm and 10pm	Before 6am
3.5	7 hours	Between 12am and 2am	Between 8am and 10am
3.3	7 hours	Between 12am and 2am	Between 10am and 12pm
3.1	7 hours	Between 10pm and 12am	Between 6am and 8am
3.26	7 hours	Between 10pm and 12am	Between 6am and 8am
3.94	7 hours	Between 12am and 2am	Between 8am and 10am
3.4	7 hours	Between 8pm and 10pm	Before 6am
3.11	7 hours	Between 10pm and 12am	Between 6am and 8am
3.2	7 hours	Between 10pm and 12am	Between 6am and 8am
2.74	7 hours	Between 12am and 2am	Between 8am and 10am
3.5	7 hours	Between 12am and 2am	Between 8am and 10am
3.81	7 hours	Between 10pm and 12am	Between 8am and 10am
3.07	7 hours	Between 10pm and 12am	Between 8am and 10am
3.43	7 hours	Between 10pm and 12am	Between 6am and 8am
3.5	7 hours	Between 10pm and 12am	Between 8am and 10am
3.4	7 hours	Between 8pm and 10pm	Before 6am
2.6	7 hours	Between 10pm and 12am	Between 6am and 8am
3.96	7 hours	Between 12am and 2am	Between 8am and 10am
3.95	7 hours	Between 10pm and 12am	Between 6am and 8am
3	7 hours	Between 10pm and 12am	Between 8am and 10am
3.5	7 hours	Between 8pm and 10pm	Before 6am
3.5	7 hours	Between 8pm and 10pm	Before 6am
3.57	7 hours	Between 8pm and 10pm	Between 6am and 8am
3.8	7 hours	Between 12am and 2am	Between 8am and 10am
3.6	7 hours	Between 10pm and 12am	Between 8am and 10am
3.92	7 hours	Between 10pm and 12am	Between 8am and 10am
3.8	7 hours	Between 10pm and 12am	Before 6am
3.7	7 hours	Between 10pm and 12am	Before 6am
3.3	7 hours	Between 10pm and 12am	Between 6am and 8am
3.45	7 hours	Between 10pm and 12am	Between 8am and 10am
2.49	7 hours	Between 12am and 2am	Between 8am and 10am
3.94	7 hours	Between 10pm and 12am	Between 6am and 8am
3.86	7 hours	Between 10pm and 12am	Between 6am and 8am
3.6	7 hours	Between 10pm and 12am	Between 8am and 10am
2.9	7 hours	Between 10pm and 12am	Between 6am and 8am
2.7	7 hours	Between 10pm and 12am	Between 6am and 8am
4	7 hours	Between 12am and 2am	Between 6am and 8am
3.6	7 hours	Between 10pm and 12am	Between 6am and 8am
3.6	7 hours	Between 10pm and 12am	Between 6am and 8am
4	7 hours	Between 10pm and 12am	Between 6am and 8am
3.6	7 hours	Between 10pm and 12am	Between 6am and 8am
3.1	7 hours	Between 12am and 2am	Between 6am and 8am
2.9	7 hours	Between 10pm and 12am	Between 6am and 8am
3.721	7 hours	Between 12am and 2am	Between 8am and 10am
3.2	7 hours	Between 12am and 2am	Between 8am and 10am
3.61	7 hours	Between 12am and 2am	Between 8am and 10am
4	7 hours	Between 12am and 2am	Between 8am and 10am
3.41	7 hours	Between 10pm and 12am	Between 6am and 8am
3.85	7 hours	Between 10pm and 12am	Between 6am and 8am
3.9	7 hours	Between 10pm and 12am	Between 6am and 8am
3.5	7 hours	Between 12am and 2am	Between 6am and 8am
3.8	7 hours	Between 10pm and 12am	Between 6am and 8am
3.6	7 hours	Between 12am and 2am	Between 8am and 10am
3.2	7 hours	Between 12am and 2am	Between 10am and 12pm
3.78	7 hours	Between 12am and 2am	Between 8am and 10am
3.9	7 hours	Between 10pm and 12am	Between 8am and 10am
3.3	7 hours	Between 12am and 2am	Between 8am and 10am
3.9	7 hours	Between 10pm and 12am	Between 8am and 10am
3.2	7 hours	Between 12am and 2am	Between 8am and 10am
3.31	7 hours	Between 10pm and 12am	Between 8am and 10am
3.47	7 hours	Between 10pm and 12am	Between 8am and 10am
3	7 hours	Between 10pm and 12am	Between 8am and 10am
3	7 hours	Between 12am and 2am	Between 6am and 8am
3.1	7 hours	Between 10pm and 12am	Between 6am and 8am
3.532	7 hours	Between 10pm and 12am	Between 8am and 10am
3.1	7 hours	Between 12am and 2am	Between 8am and 10am
3.16	7 hours	Between 10pm and 12am	Between 6am and 8am
3.1	7 hours	Between 10pm and 12am	Between 8am and 10am
3.56	7 hours	Between 12am and 2am	Between 8am and 10am
3.97	7 hours	Between 12am and 2am	Between 8am and 10am
4	7 hours	Between 12am and 2am	Between 8am and 10am
3.2	7 hours	Between 8pm and 10pm	Between 6am and 8am
3	7 hours	Between 10pm and 12am	Between 6am and 8am
3.477	7 hours	Between 12am and 2am	Between 8am and 10am
3.46	7 hours	Between 10pm and 12am	Between 6am and 8am
3.77	7 hours	Between 10pm and 12am	Between 6am and 8am
3.5	7 hours	Between 10pm and 12am	Between 6am and 8am
2.8	7 hours	Between 10pm and 12am	Between 8am and 10am
3.78	7 hours	Between 10pm and 12am	Between 6am and 8am
3.6	7 hours	Between 12am and 2am	Between 8am and 10am
3.4	7 hours	Between 10pm and 12am	Between 8am and 10am
2.9	7 hours	Between 10pm and 12am	Between 8am and 10am
3.94	7 hours	Between 10pm and 12am	Between 6am and 8am
3	7 hours	Between 10pm and 12am	Between 6am and 8am
3.1	7 hours	Between 12am and 2am	Between 8am and 10am
3.7	7 hours	Between 10pm and 12am	Between 6am and 8am
4	7 hours	Between 12am and 2am	Between 6am and 8am
4	7 hours	Between 12am and 2am	Between 8am and 10am
3.89	7 hours	Between 12am and 2am	Between 10am and 12pm
3.75	7 hours	Between 10pm and 12am	Before 6am
4	7 hours	Before 8pm	After 12pm
3.5	7 hours	Between 10pm and 12am	Between 6am and 8am
3.575	7 hours	Between 12am and 2am	Between 8am and 10am
3.5	7 hours	Between 12am and 2am	Between 8am and 10am
3.67	7 hours	Between 12am and 2am	Between 8am and 10am
3.7	7 hours	Between 10pm and 12am	Between 6am and 8am
3.51	7 hours	Between 10pm and 12am	Between 6am and 8am
2.8	7 hours	Between 12am and 2am	Between 6am and 8am
3.72	7 hours	Between 10pm and 12am	Between 6am and 8am
2.9	7 hours	Between 10pm and 12am	Before 6am
2.92	7 hours	Between 10pm and 12am	Between 6am and 8am
2.7	7 hours	Between 12am and 2am	Between 8am and 10am
3.24	7 hours	Between 12am and 2am	Between 6am and 8am
3.9	7 hours	Between 10pm and 12am	Between 8am and 10am
3.56	7 hours	Between 12am and 2am	Between 6am and 8am
3.75	7 hours	Between 10pm and 12am	Between 6am and 8am
2.8	7 hours	Between 10pm and 12am	Between 6am and 8am
3.82	7 hours	Between 10pm and 12am	Between 6am and 8am
3.7	7 hours	Between 10pm and 12am	Between 6am and 8am
3.2	7 hours	Between 12am and 2am	Between 6am and 8am
2.4	7 hours	Between 12am and 2am	Between 8am and 10am
3.75	7 hours	Between 12am and 2am	Between 10am and 12pm
2.6	7 hours	Between 10pm and 12am	Between 6am and 8am
3.73	7 hours	Between 12am and 2am	Between 6am and 8am
3.668	7 hours	Between 12am and 2am	Between 8am and 10am
2.68	7 hours	Between 12am and 2am	Between 8am and 10am
3.4	7 hours	Between 12am and 2am	Between 6am and 8am
3.5	7 hours	Between 10pm and 12am	Between 6am and 8am
2.8	7 hours	Between 12am and 2am	Between 8am and 10am
2.8	7 hours	Between 10pm and 12am	Between 6am and 8am
3.09	7 hours	Between 12am and 2am	Between 10am and 12pm
2.8	7 hours	Between 10pm and 12am	Between 6am and 8am
3.94	7 hours	Between 10pm and 12am	Between 6am and 8am
2.89	7 hours	Between 10pm and 12am	Between 10am and 12pm
3.75	8 hours	Between 10pm and 12am	Between 6am and 8am
3.3	8 hours	Between 10pm and 12am	Between 8am and 10am
4	8 hours	Between 12am and 2am	Between 8am and 10am
4	8 hours	Between 12am and 2am	Between 8am and 10am
4	8 hours	Between 10pm and 12am	Between 6am and 8am
3.91	8 hours	Between 8pm and 10pm	Between 6am and 8am
3.6	8 hours	Between 12am and 2am	Between 8am and 10am
4	8 hours	Between 10pm and 12am	Between 6am and 8am
4	8 hours	Between 10pm and 12am	Between 6am and 8am
3.75	8 hours	Between 10pm and 12am	Between 8am and 10am
3.6	8 hours	Between 10pm and 12am	Between 6am and 8am
3.5	8 hours	Between 12am and 2am	Between 8am and 10am
3.6	8 hours	After 2am	Between 8am and 10am
3.6	8 hours	Between 10pm and 12am	Between 10am and 12pm
3.8	8 hours	Between 12am and 2am	Between 8am and 10am
4	8 hours	Between 10pm and 12am	Between 6am and 8am
4	8 hours	Between 10pm and 12am	Before 6am
4	8 hours	Between 10pm and 12am	Between 6am and 8am
2.5	8 hours	Between 10pm and 12am	Between 6am and 8am
3.75	8 hours	Between 10pm and 12am	Between 8am and 10am
3.927	8 hours	Between 12am and 2am	Between 8am and 10am
3.902	8 hours	Between 10pm and 12am	Between 8am and 10am
3.44	8 hours	Between 10pm and 12am	Before 6am
3.2	8 hours	Between 10pm and 12am	Between 6am and 8am
3.33	8 hours	Between 8pm and 10pm	Between 6am and 8am
3.5	8 hours	Between 10pm and 12am	Between 8am and 10am
3.95	8 hours	Between 10pm and 12am	Between 8am and 10am
3.5	8 hours	Between 12am and 2am	Between 10am and 12pm
3.12	8 hours	Between 10pm and 12am	Between 8am and 10am
2.9	8 hours	Between 10pm and 12am	Between 6am and 8am
2.974	8 hours	Between 10pm and 12am	Between 6am and 8am
2.7	8 hours	Between 12am and 2am	Between 8am and 10am
3.5	8 hours	Between 12am and 2am	Between 8am and 10am
3.87	8 hours	Between 12am and 2am	Between 8am and 10am
3.1	8 hours	Between 10pm and 12am	Between 8am and 10am
3.5	8 hours	Between 8pm and 10pm	Between 6am and 8am
4	8 hours	Between 10pm and 12am	Between 8am and 10am
3.5	8 hours	Between 12am and 2am	Between 10am and 12pm
3.61	8 hours	Between 10pm and 12am	Between 8am and 10am
4	8 hours	Between 10pm and 12am	Between 8am and 10am
4	8 hours	Between 10pm and 12am	Between 6am and 8am
3.4	8 hours	Between 12am and 2am	Between 8am and 10am
3.9	8 hours	Between 10pm and 12am	Between 6am and 8am
2.75	8 hours	Between 10pm and 12am	Between 6am and 8am
3.5	8 hours	Between 8pm and 10pm	Before 6am
3.56	8 hours	Between 12am and 2am	Between 8am and 10am
3.1	8 hours	Between 12am and 2am	Between 8am and 10am
3.7	8 hours	Between 12am and 2am	Between 8am and 10am
3.4	8 hours	Between 12am and 2am	Between 6am and 8am
3.893	8 hours	Between 10pm and 12am	Between 8am and 10am
3.78	8 hours	Between 10pm and 12am	Between 6am and 8am
4	8 hours	Between 12am and 2am	Between 8am and 10am
3.8	8 hours	Between 8pm and 10pm	Before 6am
3.25	8 hours	Between 10pm and 12am	Between 8am and 10am
2.9	8 hours	Between 10pm and 12am	Between 6am and 8am
4	8 hours	Between 10pm and 12am	Between 8am and 10am
3.11	8 hours	Between 10pm and 12am	Between 6am and 8am
4	8 hours	Between 10pm and 12am	Between 8am and 10am
3	8 hours	Between 10pm and 12am	Between 8am and 10am
3.4	8 hours	Between 12am and 2am	Between 8am and 10am
3.01	8 hours	Between 12am and 2am	Between 10am and 12pm
3.53	8 hours	Between 10pm and 12am	Between 8am and 10am
4	8 hours	Between 10pm and 12am	Between 8am and 10am
2.3	8 hours	Between 12am and 2am	Between 8am and 10am
3.8	8 hours	Between 10pm and 12am	Between 6am and 8am
3.5	8 hours	Between 12am and 2am	Between 8am and 10am
3.8	8 hours	Between 10pm and 12am	Between 8am and 10am
3.75	8 hours	Between 10pm and 12am	Between 6am and 8am
2.8	8 hours	Between 10pm and 12am	Between 8am and 10am
4	8 hours	Between 10pm and 12am	Between 6am and 8am
0.94	8 hours	Between 10pm and 12am	Between 8am and 10am
3.7	8 hours	Between 12am and 2am	Between 8am and 10am
4	8 hours	Between 10pm and 12am	Before 6am
4	8 hours	Between 12am and 2am	Between 8am and 10am
3.3	8 hours	Between 8pm and 10pm	Before 6am
3.4	8 hours	Between 12am and 2am	Between 10am and 12pm
3.9	8 hours	Between 12am and 2am	Between 8am and 10am
3.7	8 hours	Between 10pm and 12am	Between 8am and 10am
3.3	8 hours	Between 12am and 2am	Between 8am and 10am
3.4	8 hours	Between 10pm and 12am	Between 6am and 8am
2.9	8 hours	Between 12am and 2am	Between 8am and 10am
3.12	8 hours	Between 10pm and 12am	Between 6am and 8am
4	8 hours	Between 8pm and 10pm	Before 6am
2.9	8 hours	Between 12am and 2am	Between 8am and 10am
4	8 hours	Between 12am and 2am	Between 8am and 10am
3.5	8 hours	Between 12am and 2am	Between 8am and 10am
3.45	8 hours	Between 10pm and 12am	Between 8am and 10am
4	8 hours	Between 8pm and 10pm	Before 6am
2.7	8 hours	Between 12am and 2am	Between 8am and 10am
3.76	8 hours	Between 12am and 2am	Between 10am and 12pm
2.6	8 hours	Between 10pm and 12am	Between 6am and 8am
3.9	8 hours	Between 10pm and 12am	Between 6am and 8am
3.76	8 hours	Between 10pm and 12am	Between 6am and 8am
3.63	8 hours	Between 10pm and 12am	Before 6am
2.8	9 hours	Between 10pm and 12am	Between 8am and 10am
2.7	9 hours	Between 12am and 2am	Between 8am and 10am
2.5	9 hours	Between 10pm and 12am	Between 8am and 10am
3.7	9 hours	Between 8pm and 10pm	Between 8am and 10am
3.2	9 hours	Between 10pm and 12am	Between 8am and 10am
2.5	9 hours	Between 10pm and 12am	Between 6am and 8am
3.01	9 hours	Between 10pm and 12am	Between 8am and 10am
3	9 hours	Between 12am and 2am	Between 10am and 12pm
3.674	9 hours	Between 12am and 2am	Between 10am and 12pm
3.64	9 hours	Between 10pm and 12am	Between 10am and 12pm
2.9	9 hours	Between 10pm and 12am	Between 6am and 8am
3.5	9 hours	Between 12am and 2am	Between 10am and 12pm
2.4	9 hours	After 2am	Between 10am and 12pm
3.6	9 hours	Between 10pm and 12am	Between 10am and 12pm
2.5	9 hours	Between 10pm and 12am	Between 6am and 8am
3	9 hours	Between 10pm and 12am	Between 8am and 10am
2.5	9 hours	Between 10pm and 12am	Between 8am and 10am
2.51	9 hours	Between 10pm and 12am	Between 6am and 8am
3.83	9 hours	Between 12am and 2am	Between 10am and 12pm
4	9 hours	Between 12am and 2am	Between 8am and 10am
3.55	9 hours	Between 10pm and 12am	Between 6am and 8am
3.6	9 hours	Between 10pm and 12am	Between 8am and 10am
2.9	9 hours	Between 10pm and 12am	Between 8am and 10am
3.47	9 hours	Between 10pm and 12am	Between 6am and 8am
3.4	9 hours	Between 10pm and 12am	Between 8am and 10am
4	9 hours	Between 12am and 2am	Between 10am and 12pm
2.67	9 hours	Between 12am and 2am	Between 10am and 12pm
2.79	9 hours	Between 8pm and 10pm	Before 6am
3.76	9 hours	Between 10pm and 12am	Between 6am and 8am

## Sheet: Work
Current GPA	Do you work?	How many hours work per week?
3.94	No	0
3.75	No	0
3.75	No	0
3.2	No	0
3.3	No	0
4	No	0
4	No	0
3.69	No	0
4	No	0
3.8	No	0
3.91	No	0
3.47	No	0
2.8	No	0
3.95	No	0
3.45	No	0
3.7	No	0
3.8	No	0
3.75	No	0
3.8	No	0
3.7	No	0
3.266	No	0
1.7	No	0
2.5	No	0
3.5	No	0
1.65	No	0
3.75	No	0
3.6	No	0
3.3	No	0
3.4	No	0
3.7	No	0
3.83	No	0
3	No	0
3.2	No	0
4	No	0
2.6	No	0
3.9	No	0
4	No	0
3.8	No	0
4	No	0
4	No	0
3.56	No	0
4	No	0
4	No	0
2.75	No	0
4	No	0
4	No	0
3.1	No	0
3.7	No	0
3.5	No	0
4	No	0
4	No	0
3	No	0
3.5	No	0
3.85	No	0
3.45	No	0
4	No	0
3.8	No	0
3.2	No	0
3.6	No	0
2.7	No	0
3.75	No	0
4	No	0
3.5	No	0
4	No	0
3	No	0
3.01	No	0
4	No	0
3.8	No	0
3.6	No	0
3	No	0
3	No	0
3.3	No	0
3.5	No	0
3.8	No	0
4	No	0
3.34	No	0
3.82	No	0
3.8	No	0
3.7	No	0
3.4	No	0
3.67	No	0
2.9	No	0
3.5	No	0
0.4	No	0
4	No	0
1.9	No	0
3.5	No	0
3.5	No	0
4	No	0
4	No	0
3.2	No	0
4	No	0
3.9	No	0
4	No	0
4	No	0
3.7	No	0
3.36	No	0
3.64	No	0
3.902	No	0
3.4	No	0
3.7	No	0
3.81	No	0
3.33	No	0
3.64	No	0
3.52	No	0
3.4	No	0
3.5	No	0
4	No	0
3.2	No	0
3.29	No	0
3.2	No	0
3.47	No	0
3.5	No	0
3.6	No	0
3.5	No	0
3.3	No	0
3.95	No	0
3.78	No	0
3.12	No	0
3.22	No	0
3.45	No	0
3	No	0
3.6	No	0
3.4	No	0
3.7	No	0
3.8	No	0
3.8	No	0
3.01	No	0
3.46	No	0
3.1	No	0
3.23	No	0
3.26	No	0
4	No	0
3.04	No	0
3.94	No	0
3.927	No	0
3.61	No	0
3.84	No	0
3.7	No	0
3.4	No	0
3.9	No	0
3.5	No	0
3.5	No	0
3.92	No	0
3.57	No	0
3.8	No	0
3.84	No	0
3.7	No	0
2.75	No	0
2.49	No	0
4.71	No	0
3.7	No	0
3.1	No	0
2.9	No	0
3.721	No	0
4	No	0
3.4	No	0
3.85	No	0
3.78	No	0
3.9	No	0
3.8	No	0
3.8	No	0
3.6	No	0
3.78	No	0
3.83	No	0
2.52	No	0
3.78	No	0
3.2	No	0
3.9	No	0
4	No	0
3.31	No	0
4	No	0
3.3	No	0
3.5	No	0
2.9	No	0
3	No	0
3.55	No	0
3.6	No	0
3.5	No	0
3.5	No	0
3.2	No	0
3.5	No	0
3.37	No	0
3.4	No	0
3.6	No	0
3.9	No	0
4	No	0
3.97	No	0
2.48	No	0
3.01	No	0
3.3	No	0
2.9	No	0
2.48	No	0
2.9	No	0
3.91	No	0
4	No	0
2.3	No	0
2.7	No	0
3.75	No	0
3.8	No	0
3.7	No	0
3.46	No	0
3.5	No	0
3.4	No	0
3.94	No	0
3	No	0
0.94	No	0
3.2	No	0
3	No	0
3.4	No	0
3	No	0
4	No	0
4	No	0
3.89	No	0
3	No	0
3.8	No	0
3.7	No	0
3.75	No	0
3	No	0
3.4	No	0
3.3	No	0
3.4	No	0
3	No	0
4	No	0
4	No	0
3.15	No	0
3.23	No	0
3.5	No	0
2.67	No	0
3.575	No	0
3.5	No	0
3.7	No	0
3.1	No	0
3.72	No	0
3	No	0
2.9	No	0
3.12	No	0
4	No	0
3.487	No	0
2.7	No	0
3.46	No	0
3.8	No	0
3.94	No	0
3.9	No	0
3	No	0
3.56	No	0
3.1	No	0
3.75	No	0
2.8	No	0
3.49	No	0
3.2	No	0
4	No	0
2.7	No	0
2.4	No	0
3.76	No	0
3.668	No	0
2.7	No	0
2.54	No	0
3.75	No	0
3.5	No	0
3.9	No	0
3.76	No	0
2.7	No	0
3.5	No	0
3.9	No	0
3.09	No	0
2.5	No	0
3	No	0
3.94	No	0
3.5	No	0
2.89	No	0
3.23	No	0
3.4	Yes	10-20 hours
3.13	Yes	30-40 hours
3.3	Yes	5-10 hours
3.6	Yes	10-20 hours
2.7	Yes	20-30 hours
4	Yes	10-20 hours
4	Yes	30-40 hours
3.2	Yes	20-30 hours
3.9	Yes	5-10 hours
3.9	Yes	10-20 hours
2.3	Yes	Over 40 hours
3.45	Yes	10-20 hours
3.6	Yes	10-20 hours
4	Yes	5-10 hours
3.75	Yes	20-30 hours
3.7	Yes	20-30 hours
2.1	Yes	20-30 hours
3.6	Yes	Under 5 hours
3.2	Yes	5-10 hours
2.7	Yes	5-10 hours
3.6	Yes	Under 5 hours
3.8	Yes	Under 5 hours
3.5	Yes	10-20 hours
3.5	Yes	20-30 hours
4.48	Yes	10-20 hours
4	Yes	5-10 hours
2.5	Yes	20-30 hours
3.75	Yes	5-10 hours
3.8	Yes	20-30 hours
2.5	Yes	20-30 hours
3.94	Yes	10-20 hours
4	Yes	10-20 hours
3	Yes	10-20 hours
4	Yes	5-10 hours
3.55	Yes	10-20 hours
3.3	Yes	10-20 hours
3.8	Yes	10-20 hours
2.8	Yes	30-40 hours
3.6	Yes	20-30 hours
4	Yes	20-30 hours
3.8	Yes	5-10 hours
2.8	Yes	20-30 hours
0.57	Yes	30-40 hours
0.57	Yes	30-40 hours
2.5	Yes	10-20 hours
3.31	Yes	10-20 hours
3.67	Yes	10-20 hours
3.7	Yes	5-10 hours
2	Yes	20-30 hours
3.6	Yes	10-20 hours
4	Yes	20-30 hours
3.5	Yes	10-20 hours
3.8	Yes	5-10 hours
4	Yes	30-40 hours
4	Yes	10-20 hours
3.674	Yes	20-30 hours
3.76	Yes	5-10 hours
3.927	Yes	Under 5 hours
3.1	Yes	10-20 hours
3.4	Yes	5-10 hours
2.5	Yes	10-20 hours
2.5	Yes	20-30 hours
3.4	Yes	20-30 hours
2.9	Yes	10-20 hours
3	Yes	10-20 hours
3.5	Yes	10-20 hours
2.9	Yes	10-20 hours
3.97	Yes	20-30 hours
3.4	Yes	10-20 hours
3.44	Yes	20-30 hours
2.9	Yes	5-10 hours
3.2	Yes	10-20 hours
3.5	Yes	10-20 hours
3.4	Yes	10-20 hours
3.4	Yes	10-20 hours
3	Yes	10-20 hours
3.36	Yes	10-20 hours
2.4	Yes	5-10 hours
3.83	Yes	10-20 hours
2.9	Yes	10-20 hours
2.24	Yes	20-30 hours
3.8	Yes	10-20 hours
2.5	Yes	30-40 hours
3.75	Yes	20-30 hours
3.6	Yes	5-10 hours
3.6	Yes	20-30 hours
3.51	Yes	10-20 hours
3.5	Yes	10-20 hours
3.5	Yes	10-20 hours
3.2	Yes	10-20 hours
3.75	Yes	5-10 hours
3.53	Yes	20-30 hours
3.6	Yes	10-20 hours
3.8	Yes	5-10 hours
3.5	Yes	10-20 hours
2.9	Yes	10-20 hours
3.85	Yes	10-20 hours
2.9	Yes	10-20 hours
3.6	Yes	10-20 hours
3.72	Yes	10-20 hours
3.56	Yes	20-30 hours
3.3	Yes	10-20 hours
2.974	Yes	10-20 hours
3.49	Yes	5-10 hours
3.1	Yes	10-20 hours
2.7	Yes	10-20 hours
3.3	Yes	20-30 hours
3.33	Yes	5-10 hours
2.87	Yes	10-20 hours
3.83	Yes	20-30 hours
2.28	Yes	Over 40 hours
2.75	Yes	20-30 hours
3.5	Yes	20-30 hours
3.5	Yes	10-20 hours
3.87	Yes	10-20 hours
3.04	Yes	20-30 hours
3.44	Yes	20-30 hours
3	Yes	Over 40 hours
2.5	Yes	10-20 hours
3.1	Yes	10-20 hours
3.3	Yes	5-10 hours
3.87	Yes	20-30 hours
3.5	Yes	10-20 hours
3	Yes	10-20 hours
3.7	Yes	10-20 hours
3.9	Yes	10-20 hours
3.4	Yes	20-30 hours
3.49	Yes	10-20 hours
3.11	Yes	10-20 hours
3.2	Yes	30-40 hours
3.49	Yes	10-20 hours
3.01	Yes	10-20 hours
3.45	Yes	30-40 hours
2.74	Yes	20-30 hours
3.5	Yes	20-30 hours
3.5	Yes	10-20 hours
3.15	Yes	5-10 hours
3.81	Yes	10-20 hours
3.07	Yes	30-40 hours
2.5	Yes	20-30 hours
3.8	Yes	5-10 hours
2.9	Yes	20-30 hours
3.43	Yes	20-30 hours
3.4	Yes	20-30 hours
3.5	Yes	20-30 hours
3.4	Yes	30-40 hours
2.6	Yes	20-30 hours
3.6	Yes	20-30 hours
3.96	Yes	20-30 hours
3.97	Yes	10-20 hours
3.1	Yes	20-30 hours
4	Yes	30-40 hours
3.95	Yes	10-20 hours
4	Yes	10-20 hours
2.99	Yes	20-30 hours
4	Yes	10-20 hours
3	Yes	5-10 hours
2.51	Yes	Over 40 hours
3.2	Yes	20-30 hours
3.6	Yes	10-20 hours
3.61	Yes	30-40 hours
3.86	Yes	10-20 hours
3.5	Yes	20-30 hours
3.92	Yes	10-20 hours
3.8	Yes	20-30 hours
3.3	Yes	10-20 hours
3.4	Yes	20-30 hours
3.2	Yes	20-30 hours
3.45	Yes	5-10 hours
3.3	Yes	10-20 hours
3.5	Yes	10-20 hours
3.76	Yes	20-30 hours
3.94	Yes	10-20 hours
3.92	Yes	10-20 hours
3.86	Yes	20-30 hours
3.6	Yes	20-30 hours
3.34	Yes	20-30 hours
3.56	Yes	10-20 hours
2.9	Yes	10-20 hours
3.5	Yes	20-30 hours
2.7	Yes	10-20 hours
2.9	Yes	10-20 hours
2.5	Yes	20-30 hours
3.1	Yes	Over 40 hours
3.67	Yes	20-30 hours
4	Yes	5-10 hours
3.2	Yes	10-20 hours
3.1	Yes	10-20 hours
2.69	Yes	20-30 hours
3.6	Yes	5-10 hours
3.6	Yes	5-10 hours
2.7	Yes	30-40 hours
4	Yes	10-20 hours
3.5	Yes	10-20 hours
3.6	Yes	20-30 hours
4	Yes	10-20 hours
3.45	Yes	10-20 hours
3.6	Yes	10-20 hours
3.2	Yes	10-20 hours
3	Yes	5-10 hours
3.61	Yes	Under 5 hours
2.6	Yes	30-40 hours
3.36	Yes	10-20 hours
3.41	Yes	20-30 hours
3.2	Yes	10-20 hours
3.25	Yes	30-40 hours
3.5	Yes	10-20 hours
3.3	Yes	10-20 hours
3.6	Yes	10-20 hours
3.2	Yes	30-40 hours
2.6	Yes	5-10 hours
3.8	Yes	20-30 hours
3.9	Yes	20-30 hours
3.11	Yes	20-30 hours
3.4	Yes	10-20 hours
3.06	Yes	20-30 hours
3.893	Yes	5-10 hours
3.3	Yes	10-20 hours
3.2	Yes	10-20 hours
3.78	Yes	10-20 hours
2.8	Yes	20-30 hours
2.89	Yes	10-20 hours
2	Yes	20-30 hours
3.4	Yes	20-30 hours
4	Yes	20-30 hours
2.7	Yes	20-30 hours
3.8	Yes	30-40 hours
3.25	Yes	30-40 hours
3.24	Yes	10-20 hours
3.7	Yes	20-30 hours
3.47	Yes	20-30 hours
3	Yes	20-30 hours
3.1	Yes	10-20 hours
3.532	Yes	20-30 hours
3.5	Yes	10-20 hours
3.85	Yes	5-10 hours
3.6	Yes	Under 5 hours
2.78	Yes	20-30 hours
3.89	Yes	30-40 hours
4	Yes	20-30 hours
3.11	Yes	Over 40 hours
3.7	Yes	20-30 hours
3.1	Yes	10-20 hours
3.16	Yes	10-20 hours
3.24	Yes	10-20 hours
3.7	Yes	20-30 hours
3.45	Yes	20-30 hours
4	Yes	20-30 hours
3	Yes	20-30 hours
3.1	Yes	10-20 hours
3.56	Yes	30-40 hours
4	Yes	10-20 hours
3.2	Yes	10-20 hours
3.4	Yes	10-20 hours
3.53	Yes	10-20 hours
3.5	Yes	5-10 hours
3.8	Yes	20-30 hours
3.8	Yes	10-20 hours
3.5	Yes	10-20 hours
3.8	Yes	10-20 hours
1.9	Yes	5-10 hours
3	Yes	10-20 hours
3.8	Yes	20-30 hours
2.8	Yes	20-30 hours
3	Yes	Under 5 hours
3.477	Yes	20-30 hours
3.77	Yes	10-20 hours
3.5	Yes	10-20 hours
2.8	Yes	5-10 hours
4	Yes	30-40 hours
4	Yes	10-20 hours
3.78	Yes	10-20 hours
2.76	Yes	20-30 hours
3.6	Yes	5-10 hours
2.05	Yes	10-20 hours
3.235	Yes	10-20 hours
3.6	Yes	10-20 hours
2.9	Yes	10-20 hours
3.47	Yes	5-10 hours
3.1	Yes	10-20 hours
3.1	Yes	Over 40 hours
3.7	Yes	5-10 hours
3.7	Yes	20-30 hours
4	Yes	5-10 hours
4	Yes	10-20 hours
3	Yes	10-20 hours
4	Yes	Under 5 hours
3.9	Yes	30-40 hours
3.67	Yes	10-20 hours
3.7	Yes	5-10 hours
3.51	Yes	5-10 hours
2.8	Yes	5-10 hours
3.3	Yes	30-40 hours
3.3	Yes	20-30 hours
2.8	Yes	30-40 hours
3.65	Yes	30-40 hours
3.4	Yes	10-20 hours
2.9	Yes	20-30 hours
3	Yes	10-20 hours
3	Yes	10-20 hours
3.2	Yes	30-40 hours
3.3	Yes	10-20 hours
3.09	Yes	30-40 hours
3.84	Yes	5-10 hours
2.92	Yes	20-30 hours
3.6	Yes	20-30 hours
3.26	Yes	20-30 hours
3.2	Yes	10-20 hours
3.94	Yes	20-30 hours
2.9	Yes	10-20 hours
3.24	Yes	10-20 hours
3.72	Yes	30-40 hours
4	Yes	10-20 hours
3.5	Yes	10-20 hours
3.54	Yes	10-20 hours
2.9	Yes	5-10 hours
3.45	Yes	10-20 hours
3.3	Yes	20-30 hours
3.5	Yes	10-20 hours
3.82	Yes	5-10 hours
3.7	Yes	Over 40 hours
3.82	Yes	5-10 hours
3	Yes	30-40 hours
3.98	Yes	10-20 hours
3.75	Yes	5-10 hours
2.6	Yes	10-20 hours
3.73	Yes	20-30 hours
2.91	Yes	5-10 hours
3.67	Yes	30-40 hours
3.83	Yes	10-20 hours
2.6	Yes	10-20 hours
2.68	Yes	10-20 hours
3.05	Yes	10-20 hours
3.4	Yes	20-30 hours
2.68	Yes	10-20 hours
2.8	Yes	10-20 hours
2.8	Yes	10-20 hours
2.8	Yes	10-20 hours
2.45	Yes	10-20 hours
2.79	Yes	Under 5 hours
3.76	Yes	30-40 hours
3.63	Yes	10-20 hours

## Sheet: Physical activity
Current GPA	Number of days physically active	Strength training
4	0 days (not at all)	0 days (not at all)
3.45	0 days (not at all)	1 day
3.7	0 days (not at all)	0 days (not at all)
3.2	0 days (not at all)	0 days (not at all)
3.8	0 days (not at all)	0 days (not at all)
3.7	0 days (not at all)	0 days (not at all)
3.45	0 days (not at all)	0 days (not at all)
3.75	0 days (not at all)	0 days (not at all)
3.7	0 days (not at all)	0 days (not at all)
3.2	0 days (not at all)	0 days (not at all)
4	0 days (not at all)	5 days
3	0 days (not at all)	0 days (not at all)
3.2	0 days (not at all)	0 days (not at all)
4	0 days (not at all)	0 days (not at all)
3.01	0 days (not at all)	0 days (not at all)
3.34	0 days (not at all)	0 days (not at all)
3.6	0 days (not at all)	0 days (not at all)
3.67	0 days (not at all)	1 day
2.9	0 days (not at all)	0 days (not at all)
0.57	0 days (not at all)	0 days (not at all)
0.57	0 days (not at all)	0 days (not at all)
2.5	0 days (not at all)	0 days (not at all)
3.31	0 days (not at all)	0 days (not at all)
2	0 days (not at all)	0 days (not at all)
4	0 days (not at all)	0 days (not at all)
3.674	0 days (not at all)	0 days (not at all)
3.76	0 days (not at all)	0 days (not at all)
3.36	0 days (not at all)	0 days (not at all)
3.64	0 days (not at all)	0 days (not at all)
3.4	0 days (not at all)	0 days (not at all)
3.44	0 days (not at all)	0 days (not at all)
3.5	0 days (not at all)	0 days (not at all)
3.64	0 days (not at all)	0 days (not at all)
3.2	0 days (not at all)	0 days (not at all)
3.29	0 days (not at all)	0 days (not at all)
3.47	0 days (not at all)	0 days (not at all)
3.5	0 days (not at all)	0 days (not at all)
3.6	0 days (not at all)	3 days
3.5	0 days (not at all)	0 days (not at all)
3.95	0 days (not at all)	0 days (not at all)
3.5	0 days (not at all)	0 days (not at all)
3.6	0 days (not at all)	1 day
3.1	0 days (not at all)	0 days (not at all)
2.5	0 days (not at all)	0 days (not at all)
3.3	0 days (not at all)	0 days (not at all)
3.46	0 days (not at all)	0 days (not at all)
4	0 days (not at all)	7 days
3.04	0 days (not at all)	0 days (not at all)
3.4	0 days (not at all)	0 days (not at all)
3.49	0 days (not at all)	0 days (not at all)
3.2	0 days (not at all)	0 days (not at all)
3.61	0 days (not at all)	1 day
3.7	0 days (not at all)	0 days (not at all)
3.8	0 days (not at all)	0 days (not at all)
3.4	0 days (not at all)	0 days (not at all)
3.4	0 days (not at all)	0 days (not at all)
3.1	0 days (not at all)	0 days (not at all)
2.51	0 days (not at all)	0 days (not at all)
3.45	0 days (not at all)	0 days (not at all)
3.34	0 days (not at all)	0 days (not at all)
3.5	0 days (not at all)	0 days (not at all)
2.9	0 days (not at all)	0 days (not at all)
3.67	0 days (not at all)	0 days (not at all)
2.7	0 days (not at all)	0 days (not at all)
3.5	0 days (not at all)	1 day
2.6	0 days (not at all)	0 days (not at all)
3.893	0 days (not at all)	0 days (not at all)
3.3	0 days (not at all)	0 days (not at all)
3.78	0 days (not at all)	0 days (not at all)
2.8	0 days (not at all)	0 days (not at all)
4	0 days (not at all)	0 days (not at all)
3.6	0 days (not at all)	0 days (not at all)
2.78	0 days (not at all)	0 days (not at all)
3.16	0 days (not at all)	0 days (not at all)
3.4	0 days (not at all)	0 days (not at all)
3.45	0 days (not at all)	0 days (not at all)
3.4	0 days (not at all)	0 days (not at all)
2.48	0 days (not at all)	0 days (not at all)
1.9	0 days (not at all)	0 days (not at all)
2.05	0 days (not at all)	0 days (not at all)
0.94	0 days (not at all)	0 days (not at all)
3	0 days (not at all)	0 days (not at all)
4	0 days (not at all)	0 days (not at all)
3.15	0 days (not at all)	0 days (not at all)
3.1	0 days (not at all)	0 days (not at all)
3.65	0 days (not at all)	0 days (not at all)
2.9	0 days (not at all)	0 days (not at all)
3.12	0 days (not at all)	0 days (not at all)
3.84	0 days (not at all)	4 days
3.24	0 days (not at all)	0 days (not at all)
3.45	0 days (not at all)	0 days (not at all)
3.49	0 days (not at all)	0 days (not at all)
3.82	0 days (not at all)	0 days (not at all)
3.7	0 days (not at all)	0 days (not at all)
3.2	0 days (not at all)	0 days (not at all)
3.98	0 days (not at all)	0 days (not at all)
3.76	0 days (not at all)	0 days (not at all)
3.67	0 days (not at all)	4 days
3.83	0 days (not at all)	0 days (not at all)
2.6	0 days (not at all)	0 days (not at all)
2.54	0 days (not at all)	0 days (not at all)
3.9	0 days (not at all)	0 days (not at all)
2.8	0 days (not at all)	0 days (not at all)
3.75	1 day	0 days (not at all)
3.75	1 day	0 days (not at all)
3.2	1 day	1 day
3.69	1 day	2 days
3.8	1 day	0 days (not at all)
3.8	1 day	1 day
2.5	1 day	0 days (not at all)
3.6	1 day	1 day
3.8	1 day	0 days (not at all)
4.48	1 day	1 day
4	1 day	0 days (not at all)
3.5	1 day	1 day
4	1 day	1 day
3.5	1 day	0 days (not at all)
4	1 day	1 day
3.8	1 day	1 day
3	1 day	0 days (not at all)
3.5	1 day	1 day
2.8	1 day	1 day
3.2	1 day	1 day
3.6	1 day	0 days (not at all)
4	1 day	0 days (not at all)
2.5	1 day	0 days (not at all)
3.4	1 day	1 day
2.9	1 day	1 day
3.5	1 day	0 days (not at all)
2.4	1 day	0 days (not at all)
3.53	1 day	0 days (not at all)
3.78	1 day	0 days (not at all)
2.974	1 day	0 days (not at all)
2.7	1 day	1 day
3.5	1 day	4 days
3.5	1 day	1 day
3.9	1 day	2 days
3.5	1 day	0 days (not at all)
3	1 day	0 days (not at all)
3.4	1 day	0 days (not at all)
3.8	1 day	2 days
3.6	1 day	1 day
4.71	1 day	0 days (not at all)
3.56	1 day	1 day
3.1	1 day	0 days (not at all)
3.6	1 day	0 days (not at all)
4	1 day	1 day
4	1 day	0 days (not at all)
3.721	1 day	1 day
3.36	1 day	2 days
3.3	1 day	1 day
3.6	1 day	1 day
3.8	1 day	1 day
3.11	1 day	0 days (not at all)
3.25	1 day	0 days (not at all)
2.9	1 day	1 day
3.5	1 day	1 day
3.89	1 day	0 days (not at all)
4	1 day	0 days (not at all)
3.2	1 day	0 days (not at all)
2.3	1 day	1 day
3	1 day	3 days
3.77	1 day	0 days (not at all)
2.8	1 day	0 days (not at all)
4	1 day	0 days (not at all)
3.4	1 day	1 day
3.235	1 day	2 days
3	1 day	0 days (not at all)
3.7	1 day	0 days (not at all)
3	1 day	0 days (not at all)
3.05	1 day	0 days (not at all)
3.75	1 day	1 day
3.4	2 days	0 days (not at all)
2.8	2 days	2 days
3.3	2 days	0 days (not at all)
2.7	2 days	0 days (not at all)
3.266	2 days	0 days (not at all)
2.3	2 days	2 days
3.6	2 days	0 days (not at all)
3	2 days	2 days
3.2	2 days	2 days
3.5	2 days	2 days
3.1	2 days	0 days (not at all)
3.8	2 days	2 days
3.94	2 days	1 day
2.7	2 days	1 day
3	2 days	2 days
3.6	2 days	3 days
3.3	2 days	0 days (not at all)
3.3	2 days	0 days (not at all)
3.5	2 days	0 days (not at all)
4	2 days	0 days (not at all)
4	2 days	1 day
3.9	2 days	0 days (not at all)
3.8	2 days	0 days (not at all)
2.5	2 days	3 days
3.33	2 days	0 days (not at all)
3.2	2 days	0 days (not at all)
3.83	2 days	0 days (not at all)
3.51	2 days	3 days
3.8	2 days	0 days (not at all)
3.5	2 days	1 day
3.6	2 days	2 days
3.6	2 days	0 days (not at all)
3.72	2 days	1 day
3.3	2 days	0 days (not at all)
2.87	2 days	0 days (not at all)
3.1	2 days	0 days (not at all)
3	2 days	0 days (not at all)
3.45	2 days	0 days (not at all)
3.84	2 days	1 day
3.07	2 days	0 days (not at all)
2.9	2 days	0 days (not at all)
3.43	2 days	0 days (not at all)
3.95	2 days	0 days (not at all)
3.5	2 days	0 days (not at all)
2.49	2 days	0 days (not at all)
2.69	2 days	1 day
3.6	2 days	0 days (not at all)
3	2 days	1 day
2.6	2 days	3 days
3.2	2 days	0 days (not at all)
3.6	2 days	0 days (not at all)
3.78	2 days	3 days
3.9	2 days	0 days (not at all)
3.9	2 days	0 days (not at all)
4	2 days	0 days (not at all)
2.89	2 days	2 days
2	2 days	0 days (not at all)
3.3	2 days	2 days
2.7	2 days	2 days
3.24	2 days	2 days
3.7	2 days	1 day
3.532	2 days	0 days (not at all)
3.5	2 days	1 day
3.6	2 days	2 days
3.1	2 days	0 days (not at all)
3.24	2 days	2 days
3.7	2 days	0 days (not at all)
3.6	2 days	0 days (not at all)
4	2 days	1 day
4	2 days	0 days (not at all)
3.1	2 days	1 day
4	2 days	2 days
3.01	2 days	2 days
2.9	2 days	0 days (not at all)
2.7	2 days	2 days
3.5	2 days	1 day
3.477	2 days	2 days
3.47	2 days	0 days (not at all)
3.1	2 days	2 days
4	2 days	0 days (not at all)
3.4	2 days	0 days (not at all)
2.67	2 days	0 days (not at all)
3.7	2 days	2 days
3.3	2 days	0 days (not at all)
2.8	2 days	2 days
3.46	2 days	4 days
3.94	2 days	1 day
2.9	2 days	1 day
3.1	2 days	0 days (not at all)
3.75	2 days	0 days (not at all)
2.68	2 days	2 days
2.45	2 days	1 day
3.76	2 days	0 days (not at all)
3.94	3 days	1 day
3.6	3 days	1 day
3.95	3 days	2 days
4	3 days	0 days (not at all)
3.9	3 days	2 days
3.5	3 days	2 days
1.65	3 days	0 days (not at all)
4	3 days	3 days
3.7	3 days	2 days
3.83	3 days	3 days
2.6	3 days	0 days (not at all)
4	3 days	2 days
2.5	3 days	0 days (not at all)
3.8	3 days	0 days (not at all)
4	3 days	0 days (not at all)
3.8	3 days	0 days (not at all)
3.6	3 days	2 days
4	3 days	3 days
4	3 days	0 days (not at all)
3	3 days	0 days (not at all)
3	3 days	0 days (not at all)
3.55	3 days	0 days (not at all)
3.4	3 days	2 days
4	3 days	1 day
1.9	3 days	0 days (not at all)
4	3 days	2 days
3.5	3 days	3 days
4	3 days	0 days (not at all)
3.927	3 days	0 days (not at all)
3.97	3 days	1 day
3.4	3 days	2 days
3.2	3 days	3 days
3.4	3 days	1 day
2.9	3 days	2 days
3.6	3 days	2 days
3.8	3 days	0 days (not at all)
2.5	3 days	3 days
3.75	3 days	3 days
3.3	3 days	3 days
3.75	3 days	3 days
3.85	3 days	0 days (not at all)
3	3 days	3 days
3.56	3 days	3 days
3.33	3 days	0 days (not at all)
3.83	3 days	1 day
3.23	3 days	3 days
3.87	3 days	2 days
3.26	3 days	0 days (not at all)
3.927	3 days	0 days (not at all)
2.6	3 days	0 days (not at all)
3.6	3 days	0 days (not at all)
4	3 days	0 days (not at all)
3.2	3 days	3 days
3.3	3 days	0 days (not at all)
3.2	3 days	1 day
3.3	3 days	5 days
3.76	3 days	0 days (not at all)
3.6	3 days	3 days
3.2	3 days	3 days
3.6	3 days	3 days
3.6	3 days	1 day
4	3 days	0 days (not at all)
3.83	3 days	0 days (not at all)
3.4	3 days	0 days (not at all)
2.52	3 days	0 days (not at all)
3.2	3 days	2 days
3.4	3 days	3 days
3.8	3 days	0 days (not at all)
3.5	3 days	2 days
3.11	3 days	0 days (not at all)
3.5	3 days	2 days
3.7	3 days	2 days
4	3 days	3 days
3.8	3 days	0 days (not at all)
3.8	3 days	3 days
3.8	3 days	3 days
2.8	3 days	2 days
3.5	3 days	2 days
3.7	3 days	6 days
4	3 days	2 days
3.89	3 days	1 day
3	3 days	0 days (not at all)
3	3 days	3 days
4	3 days	0 days (not at all)
3.9	3 days	4 days
3.5	3 days	2 days
3.51	3 days	5 days
2.8	3 days	2 days
3.09	3 days	2 days
2.92	3 days	0 days (not at all)
3.94	3 days	3 days
4	3 days	0 days (not at all)
3.5	3 days	4 days
3.54	3 days	3 days
3.82	3 days	0 days (not at all)
2.7	3 days	3 days
2.68	3 days	3 days
3.09	3 days	2 days
3.5	3 days	3 days
4	4 days	4 days
3.6	4 days	0 days (not at all)
3.3	4 days	2 days
2.1	4 days	0 days (not at all)
4	4 days	3 days
3.7	4 days	3 days
3.45	4 days	4 days
4	4 days	4 days
4	4 days	3 days
3.5	4 days	2 days
3.4	4 days	0 days (not at all)
3.36	4 days	2 days
2.24	4 days	0 days (not at all)
3.87	4 days	0 days (not at all)
3.5	4 days	4 days
3.01	4 days	3 days
3.5	4 days	2 days
3.15	4 days	3 days
2.5	4 days	4 days
2.99	4 days	4 days
3.5	4 days	4 days
3.86	4 days	2 days
3.1	4 days	4 days
4	4 days	0 days (not at all)
3.2	4 days	4 days
3.4	4 days	3 days
3.41	4 days	4 days
3.25	4 days	0 days (not at all)
3.2	4 days	4 days
3.85	4 days	6 days
3.3	4 days	2 days
3.53	4 days	4 days
3.8	4 days	4 days
2.48	4 days	3 days
3.91	4 days	4 days
3.75	4 days	2 days
3.7	4 days	1 day
3.46	4 days	2 days
3.5	4 days	2 days
3.6	4 days	3 days
3.1	4 days	1 day
4	4 days	4 days
3.23	4 days	3 days
3.9	4 days	4 days
3.72	4 days	0 days (not at all)
3.668	4 days	3 days
4	5 days	4 days
4	5 days	5 days
3.47	5 days	6 days
3.9	5 days	5 days
3.4	5 days	4 days
2.7	5 days	0 days (not at all)
3.5	5 days	5 days
3.56	5 days	5 days
4	5 days	3 days
4	5 days	4 days
2.75	5 days	5 days
3.5	5 days	3 days
3.75	5 days	5 days
4	5 days	0 days (not at all)
2.5	5 days	5 days
4	5 days	5 days
3.8	5 days	0 days (not at all)
3.82	5 days	4 days
3.8	5 days	2 days
3.8	5 days	2 days
3.67	5 days	3 days
3.7	5 days	2 days
3.7	5 days	1 day
3.1	5 days	4 days
2.9	5 days	3 days
3	5 days	3 days
3.902	5 days	5 days
4	5 days	3 days
3.4	5 days	5 days
3	5 days	5 days
3.5	5 days	5 days
3.2	5 days	5 days
2.9	5 days	1 day
3.22	5 days	4 days
3.8	5 days	4 days
3.3	5 days	0 days (not at all)
2.28	5 days	3 days
3.04	5 days	3 days
3.94	5 days	3 days
3.11	5 days	5 days
2.74	5 days	5 days
4	5 days	3 days
3.61	5 days	2 days
3.92	5 days	3 days
3.8	5 days	2 days
2.75	5 days	0 days (not at all)
3.92	5 days	5 days
2.7	5 days	5 days
3.7	5 days	4 days
3.1	5 days	2 days
2.9	5 days	2 days
3.31	5 days	4 days
3.9	5 days	6 days
3	5 days	0 days (not at all)
3.97	5 days	5 days
3.5	5 days	5 days
3	5 days	0 days (not at all)
4	5 days	5 days
3.94	5 days	3 days
3.2	5 days	4 days
3	5 days	3 days
3.3	5 days	1 day
3	5 days	5 days
4	5 days	5 days
3.575	5 days	5 days
3.4	5 days	2 days
3	5 days	4 days
3	5 days	4 days
3.3	5 days	5 days
3.6	5 days	2 days
3.26	5 days	3 days
3.8	5 days	2 days
3.3	5 days	0 days (not at all)
3.5	5 days	5 days
2.8	5 days	1 day
3	5 days	0 days (not at all)
4	5 days	2 days
2.7	5 days	5 days
2.4	5 days	0 days (not at all)
2.6	5 days	0 days (not at all)
3.73	5 days	5 days
2.91	5 days	5 days
2.5	5 days	2 days
3	5 days	2 days
3.94	5 days	5 days
3.23	5 days	4 days
3.91	6 days	6 days
3.75	6 days	4 days
4	6 days	4 days
4	6 days	1 day
3.85	6 days	1 day
2.8	6 days	6 days
3.5	6 days	5 days
3.5	6 days	3 days
2.9	6 days	3 days
3.81	6 days	2 days
3.45	6 days	3 days
3.4	6 days	6 days
3.49	6 days	3 days
3.01	6 days	6 days
3.1	6 days	6 days
3.96	6 days	6 days
3.97	6 days	6 days
3.9	6 days	3 days
3.86	6 days	4 days
3.84	6 days	3 days
3.7	6 days	3 days
3.4	6 days	4 days
3.94	6 days	5 days
3.45	6 days	3 days
3.61	6 days	6 days
3.2	6 days	6 days
3.5	6 days	4 days
3.8	6 days	2 days
3.06	6 days	5 days
3.2	6 days	6 days
3.37	6 days	3 days
3.56	6 days	4 days
2.9	6 days	0 days (not at all)
3	6 days	3 days
3.4	6 days	6 days
3.75	6 days	6 days
3.7	6 days	5 days
3	6 days	5 days
3.2	6 days	6 days
2.9	6 days	3 days
4	6 days	4 days
3.75	6 days	6 days
2.7	6 days	6 days
3.5	6 days	2 days
3.9	6 days	4 days
3.3	7 days	7 days
3.13	7 days	1 day
3.75	7 days	2 days
1.7	7 days	0 days (not at all)
3.6	7 days	3 days
3.9	7 days	3 days
4	7 days	5 days
4	7 days	3 days
3.75	7 days	7 days
3.8	7 days	7 days
3.7	7 days	0 days (not at all)
0.4	7 days	7 days
4	7 days	7 days
3.4	7 days	2 days
3.7	7 days	2 days
3.52	7 days	3 days
3.6	7 days	4 days
3.12	7 days	3 days
2.9	7 days	1 day
3.7	7 days	6 days
3.8	7 days	3 days
2.75	7 days	0 days (not at all)
3.44	7 days	3 days
3	7 days	1 day
3.7	7 days	5 days
3.49	7 days	7 days
4	7 days	1 day
3.5	7 days	3 days
3.5	7 days	3 days
3.92	7 days	6 days
3.57	7 days	7 days
3.85	7 days	4 days
3.78	7 days	2 days
3.9	7 days	5 days
3.8	7 days	7 days
3.78	7 days	5 days
4	7 days	0 days (not at all)
3.47	7 days	7 days
3	7 days	7 days
3	7 days	1 day
3.55	7 days	5 days
3.1	7 days	3 days
3.5	7 days	7 days
3.8	7 days	3 days
3.78	7 days	7 days
4	7 days	4 days
3.8	7 days	7 days
3.7	7 days	0 days (not at all)
3.4	7 days	7 days
3.5	7 days	7 days
3.67	7 days	0 days (not at all)
3.3	7 days	0 days (not at all)
3.72	7 days	2 days
3.487	7 days	7 days
2.7	7 days	5 days
3.2	7 days	0 days (not at all)
3.56	7 days	4 days
3.4	7 days	7 days
3.76	7 days	6 days
3.5	7 days	4 days
2.8	7 days	7 days
2.8	7 days	7 days
2.79	7 days	5 days
3.63	7 days	6 days

## Sheet: Eating habits
Current GPA	Vegetables	Vegetables 2	Fruit	Fruit juice	Green salad	Milk	Breakfast	Soda	Diet Soda	Energy drinks	Sports drinks	Fast Food
1.7	0 times (not at all)	0 times (not at all)	4 to 6 times	4 to 6 times	0 times (not at all)	0 glasses (not at all)	1 day	0 times (not at all)	0 times (not at all)	0 times (not at all)	1 to 3 times	1 to 3 times
3.94	0 times (not at all)	0 times (not at all)	1 to 3 times	0 times (not at all)	0 times (not at all)	0 glasses (not at all)	1 day	4 to 6 times	0 times (not at all)	0 times (not at all)	1 to 3 times	1 to 3 times
4	0 times (not at all)	0 times (not at all)	0 times (not at all)	0 times (not at all)	0 times (not at all)	1 to 3 glasses	0 days (not at all)	0 times (not at all)	0 times (not at all)	0 times (not at all)	0 times (not at all)	1 to 3 times
3.8	0 times (not at all)	0 times (not at all)	0 times (not at all)	0 times (not at all)	0 times (not at all)	1 to 3 glasses	0 days (not at all)	0 times (not at all)	0 times (not at all)	0 times (not at all)	0 times (not at all)	1 to 3 times
3.6	0 times (not at all)	0 times (not at all)	0 times (not at all)	7 to 10 times	0 times (not at all)	0 glasses (not at all)	0 days (not at all)	1 to 3 times	1 to 3 times	0 times (not at all)	1 to 3 times	1 to 3 times
0.57	0 times (not at all)	0 times (not at all)	1 to 3 times	1 to 3 times	0 times (not at all)	0 glasses (not at all)	2 days	1 to 3 times	0 times (not at all)	0 times (not at all)	0 times (not at all)	4 to 6 times
3.76	0 times (not at all)	0 times (not at all)	0 times (not at all)	0 times (not at all)	1 to 3 times	0 glasses (not at all)	0 days (not at all)	0 times (not at all)	0 times (not at all)	0 times (not at all)	0 times (not at all)	1 to 3 times
3.22	0 times (not at all)	0 times (not at all)	1 to 3 times	1 to 3 times	0 times (not at all)	0 glasses (not at all)	1 day	0 times (not at all)	0 times (not at all)	0 times (not at all)	1 to 3 times	7 to 10 times
2.7	0 times (not at all)	0 times (not at all)	0 times (not at all)	0 times (not at all)	0 times (not at all)	1 to 3 glasses	0 days (not at all)	0 times (not at all)	0 times (not at all)	0 times (not at all)	0 times (not at all)	1 to 3 times
3.49	0 times (not at all)	0 times (not at all)	4 to 6 times	0 times (not at all)	0 times (not at all)	0 glasses (not at all)	7 days (everyday)	0 times (not at all)	0 times (not at all)	0 times (not at all)	1 to 3 times	0 times (not at all)
3.927	0 times (not at all)	0 times (not at all)	1 to 3 times	0 times (not at all)	0 times (not at all)	1 to 3 glasses	2 days	0 times (not at all)	0 times (not at all)	0 times (not at all)	0 times (not at all)	1 to 3 times
3.8	0 times (not at all)	0 times (not at all)	1 to 3 times	1 to 3 times	1 to 3 times	1 to 3 glasses	4 days	1 to 3 times	1 to 3 times	0 times (not at all)	0 times (not at all)	1 to 3 times
3.5	0 times (not at all)	0 times (not at all)	1 to 3 times	0 times (not at all)	0 times (not at all)	0 glasses (not at all)	2 days	1 to 3 times	0 times (not at all)	0 times (not at all)	4 to 6 times	4 to 6 times
3.3	0 times (not at all)	0 times (not at all)	4 to 6 times	0 times (not at all)	0 times (not at all)	11 glasses or more	5 days	0 times (not at all)	0 times (not at all)	0 times (not at all)	1 to 3 times	0 times (not at all)
3.4	0 times (not at all)	0 times (not at all)	4 to 6 times	4 to 6 times	0 times (not at all)	0 glasses (not at all)	2 days	0 times (not at all)	0 times (not at all)	0 times (not at all)	4 to 6 times	4 to 6 times
3.45	0 times (not at all)	0 times (not at all)	1 to 3 times	1 to 3 times	0 times (not at all)	0 glasses (not at all)	1 day	1 to 3 times	0 times (not at all)	0 times (not at all)	0 times (not at all)	4 to 6 times
3.6	0 times (not at all)	0 times (not at all)	1 to 3 times	0 times (not at all)	0 times (not at all)	7 to 10 glasses	7 days (everyday)	1 to 3 times	0 times (not at all)	0 times (not at all)	0 times (not at all)	1 to 3 times
4	0 times (not at all)	0 times (not at all)	0 times (not at all)	1 to 3 times	0 times (not at all)	4 to 6 glasses	4 days	1 to 3 times	0 times (not at all)	0 times (not at all)	4 to 6 times	1 to 3 times
3	0 times (not at all)	0 times (not at all)	1 to 3 times	4 to 6 times	1 to 3 times	0 glasses (not at all)	3 days	0 times (not at all)	0 times (not at all)	1 to 3 times	0 times (not at all)	0 times (not at all)
3.15	0 times (not at all)	0 times (not at all)	0 times (not at all)	1 to 3 times	1 to 3 times	0 glasses (not at all)	2 days	7 to 10 times	0 times (not at all)	0 times (not at all)	1 to 3 times	11 times or more
3.1	0 times (not at all)	0 times (not at all)	0 times (not at all)	7 to 10 times	0 times (not at all)	0 glasses (not at all)	5 days	4 to 6 times	0 times (not at all)	11 times or more	0 times (not at all)	11 times or more
3	0 times (not at all)	0 times (not at all)	1 to 3 times	1 to 3 times	0 times (not at all)	0 glasses (not at all)	1 day	0 times (not at all)	0 times (not at all)	0 times (not at all)	1 to 3 times	7 to 10 times
3	0 times (not at all)	0 times (not at all)	1 to 3 times	1 to 3 times	0 times (not at all)	0 glasses (not at all)	1 day	0 times (not at all)	0 times (not at all)	0 times (not at all)	1 to 3 times	7 to 10 times
3.84	0 times (not at all)	0 times (not at all)	4 to 6 times	1 to 3 times	0 times (not at all)	4 to 6 glasses	7 days (everyday)	1 to 3 times	0 times (not at all)	0 times (not at all)	0 times (not at all)	1 to 3 times
2.92	0 times (not at all)	0 times (not at all)	4 to 6 times	1 to 3 times	0 times (not at all)	0 glasses (not at all)	0 days (not at all)	7 to 10 times	0 times (not at all)	1 to 3 times	4 to 6 times	0 times (not at all)
2.7	0 times (not at all)	0 times (not at all)	1 to 3 times	0 times (not at all)	0 times (not at all)	0 glasses (not at all)	3 days	4 to 6 times	4 to 6 times	1 to 3 times	0 times (not at all)	7 to 10 times
3.3	0 times (not at all)	0 times (not at all)	1 to 3 times	1 to 3 times	0 times (not at all)	0 glasses (not at all)	5 days	0 times (not at all)	0 times (not at all)	0 times (not at all)	1 to 3 times	11 times or more
3.82	0 times (not at all)	0 times (not at all)	7 to 10 times	1 to 3 times	0 times (not at all)	7 to 10 glasses	7 days (everyday)	0 times (not at all)	1 to 3 times	0 times (not at all)	1 to 3 times	1 to 3 times
3.98	0 times (not at all)	0 times (not at all)	1 to 3 times	1 to 3 times	0 times (not at all)	4 to 6 glasses	7 days (everyday)	7 to 10 times	11 times or more	0 times (not at all)	0 times (not at all)	4 to 6 times
2.6	0 times (not at all)	0 times (not at all)	0 times (not at all)	0 times (not at all)	0 times (not at all)	0 glasses (not at all)	4 days	0 times (not at all)	0 times (not at all)	0 times (not at all)	0 times (not at all)	0 times (not at all)
3.83	0 times (not at all)	0 times (not at all)	0 times (not at all)	0 times (not at all)	0 times (not at all)	0 glasses (not at all)	1 day	0 times (not at all)	0 times (not at all)	0 times (not at all)	0 times (not at all)	0 times (not at all)
3.75	0 times (not at all)	0 times (not at all)	0 times (not at all)	0 times (not at all)	0 times (not at all)	1 to 3 glasses	3 days	11 times or more	0 times (not at all)	0 times (not at all)	0 times (not at all)	1 to 3 times
2.45	0 times (not at all)	0 times (not at all)	0 times (not at all)	0 times (not at all)	0 times (not at all)	1 to 3 glasses	1 day	4 to 6 times	0 times (not at all)	0 times (not at all)	1 to 3 times	1 to 3 times
3.94	1 to 3 times	1 to 3 times	1 to 3 times	0 times (not at all)	0 times (not at all)	0 glasses (not at all)	0 days (not at all)	7 to 10 times	0 times (not at all)	0 times (not at all)	0 times (not at all)	1 to 3 times
3.4	1 to 3 times	1 to 3 times	0 times (not at all)	0 times (not at all)	0 times (not at all)	0 glasses (not at all)	0 days (not at all)	1 to 3 times	0 times (not at all)	0 times (not at all)	4 to 6 times	1 to 3 times
4	1 to 3 times	1 to 3 times	7 to 10 times	1 to 3 times	0 times (not at all)	1 to 3 glasses	7 days (everyday)	0 times (not at all)	0 times (not at all)	0 times (not at all)	0 times (not at all)	0 times (not at all)
3.8	1 to 3 times	1 to 3 times	1 to 3 times	0 times (not at all)	0 times (not at all)	0 glasses (not at all)	4 days	1 to 3 times	0 times (not at all)	0 times (not at all)	0 times (not at all)	0 times (not at all)
2.8	1 to 3 times	1 to 3 times	4 to 6 times	1 to 3 times	1 to 3 times	0 glasses (not at all)	3 days	0 times (not at all)	0 times (not at all)	0 times (not at all)	0 times (not at all)	1 to 3 times
3.3	1 to 3 times	1 to 3 times	1 to 3 times	0 times (not at all)	1 to 3 times	1 to 3 glasses	5 days	1 to 3 times	0 times (not at all)	0 times (not at all)	0 times (not at all)	1 to 3 times
3.95	1 to 3 times	1 to 3 times	4 to 6 times	1 to 3 times	0 times (not at all)	7 to 10 glasses	7 days (everyday)	1 to 3 times	0 times (not at all)	0 times (not at all)	0 times (not at all)	1 to 3 times
3.7	1 to 3 times	1 to 3 times	7 to 10 times	0 times (not at all)	0 times (not at all)	0 glasses (not at all)	5 days	0 times (not at all)	0 times (not at all)	0 times (not at all)	0 times (not at all)	1 to 3 times
3.2	1 to 3 times	1 to 3 times	4 to 6 times	0 times (not at all)	0 times (not at all)	0 glasses (not at all)	5 days	0 times (not at all)	0 times (not at all)	0 times (not at all)	0 times (not at all)	1 to 3 times
3.8	1 to 3 times	1 to 3 times	4 to 6 times	1 to 3 times	1 to 3 times	0 glasses (not at all)	6 days	0 times (not at all)	0 times (not at all)	1 to 3 times	0 times (not at all)	1 to 3 times
3.9	1 to 3 times	1 to 3 times	4 to 6 times	0 times (not at all)	1 to 3 times	1 to 3 glasses	5 days	0 times (not at all)	0 times (not at all)	1 to 3 times	0 times (not at all)	1 to 3 times
3.75	1 to 3 times	1 to 3 times	7 to 10 times	0 times (not at all)	11 times or more	1 to 3 glasses	7 days (everyday)	0 times (not at all)	0 times (not at all)	0 times (not at all)	4 to 6 times	0 times (not at all)
3.9	1 to 3 times	1 to 3 times	4 to 6 times	1 to 3 times	1 to 3 times	1 to 3 glasses	5 days	1 to 3 times	0 times (not at all)	0 times (not at all)	0 times (not at all)	4 to 6 times
3.7	1 to 3 times	1 to 3 times	4 to 6 times	1 to 3 times	0 times (not at all)	1 to 3 glasses	1 day	7 to 10 times	0 times (not at all)	0 times (not at all)	0 times (not at all)	4 to 6 times
3.266	1 to 3 times	1 to 3 times	1 to 3 times	0 times (not at all)	0 times (not at all)	1 to 3 glasses	4 days	11 times or more	0 times (not at all)	0 times (not at all)	0 times (not at all)	0 times (not at all)
3.6	1 to 3 times	1 to 3 times	1 to 3 times	0 times (not at all)	1 to 3 times	1 to 3 glasses	2 days	1 to 3 times	0 times (not at all)	0 times (not at all)	0 times (not at all)	1 to 3 times
3.5	1 to 3 times	1 to 3 times	4 to 6 times	1 to 3 times	1 to 3 times	0 glasses (not at all)	7 days (everyday)	0 times (not at all)	0 times (not at all)	0 times (not at all)	1 to 3 times	1 to 3 times
3.75	1 to 3 times	1 to 3 times	0 times (not at all)	0 times (not at all)	1 to 3 times	1 to 3 glasses	3 days	0 times (not at all)	0 times (not at all)	0 times (not at all)	0 times (not at all)	1 to 3 times
3.3	1 to 3 times	1 to 3 times	7 to 10 times	0 times (not at all)	1 to 3 times	1 to 3 glasses	7 days (everyday)	0 times (not at all)	0 times (not at all)	0 times (not at all)	0 times (not at all)	1 to 3 times
2.1	1 to 3 times	1 to 3 times	1 to 3 times	1 to 3 times	0 times (not at all)	4 to 6 glasses	3 days	4 to 6 times	0 times (not at all)	0 times (not at all)	0 times (not at all)	1 to 3 times
3.6	1 to 3 times	1 to 3 times	1 to 3 times	7 to 10 times	1 to 3 times	0 glasses (not at all)	1 day	1 to 3 times	0 times (not at all)	0 times (not at all)	1 to 3 times	4 to 6 times
3.2	1 to 3 times	1 to 3 times	0 times (not at all)	1 to 3 times	1 to 3 times	1 to 3 glasses	6 days	4 to 6 times	0 times (not at all)	0 times (not at all)	0 times (not at all)	4 to 6 times
3.83	1 to 3 times	1 to 3 times	4 to 6 times	1 to 3 times	1 to 3 times	1 to 3 glasses	7 days (everyday)	4 to 6 times	0 times (not at all)	0 times (not at all)	0 times (not at all)	1 to 3 times
2.7	1 to 3 times	1 to 3 times	1 to 3 times	0 times (not at all)	0 times (not at all)	0 glasses (not at all)	2 days	1 to 3 times	0 times (not at all)	0 times (not at all)	0 times (not at all)	4 to 6 times
3.5	1 to 3 times	1 to 3 times	4 to 6 times	0 times (not at all)	1 to 3 times	1 to 3 glasses	7 days (everyday)	0 times (not at all)	0 times (not at all)	0 times (not at all)	0 times (not at all)	0 times (not at all)
3.5	1 to 3 times	1 to 3 times	0 times (not at all)	0 times (not at all)	1 to 3 times	1 to 3 glasses	1 day	0 times (not at all)	0 times (not at all)	0 times (not at all)	0 times (not at all)	4 to 6 times
4	1 to 3 times	1 to 3 times	1 to 3 times	1 to 3 times	1 to 3 times	1 to 3 glasses	5 days	1 to 3 times	1 to 3 times	0 times (not at all)	1 to 3 times	1 to 3 times
4	1 to 3 times	1 to 3 times	4 to 6 times	1 to 3 times	1 to 3 times	1 to 3 glasses	4 days	0 times (not at all)	0 times (not at all)	0 times (not at all)	4 to 6 times	1 to 3 times
4	1 to 3 times	1 to 3 times	1 to 3 times	1 to 3 times	1 to 3 times	1 to 3 glasses	4 days	0 times (not at all)	0 times (not at all)	0 times (not at all)	4 to 6 times	1 to 3 times
2.75	1 to 3 times	1 to 3 times	1 to 3 times	0 times (not at all)	1 to 3 times	1 to 3 glasses	3 days	0 times (not at all)	0 times (not at all)	0 times (not at all)	1 to 3 times	1 to 3 times
3.1	1 to 3 times	1 to 3 times	0 times (not at all)	4 to 6 times	1 to 3 times	0 glasses (not at all)	2 days	0 times (not at all)	0 times (not at all)	0 times (not at all)	1 to 3 times	1 to 3 times
3.75	1 to 3 times	1 to 3 times	4 to 6 times	1 to 3 times	1 to 3 times	1 to 3 glasses	7 days (everyday)	0 times (not at all)	0 times (not at all)	0 times (not at all)	1 to 3 times	0 times (not at all)
4	1 to 3 times	1 to 3 times	1 to 3 times	0 times (not at all)	0 times (not at all)	0 glasses (not at all)	4 days	0 times (not at all)	0 times (not at all)	0 times (not at all)	0 times (not at all)	0 times (not at all)
3.85	1 to 3 times	1 to 3 times	7 to 10 times	1 to 3 times	4 to 6 times	1 to 3 glasses	1 day	1 to 3 times	1 to 3 times	0 times (not at all)	0 times (not at all)	4 to 6 times
3.8	1 to 3 times	1 to 3 times	0 times (not at all)	0 times (not at all)	0 times (not at all)	7 to 10 glasses	7 days (everyday)	1 to 3 times	0 times (not at all)	0 times (not at all)	1 to 3 times	0 times (not at all)
2.5	1 to 3 times	1 to 3 times	0 times (not at all)	0 times (not at all)	1 to 3 times	0 glasses (not at all)	3 days	0 times (not at all)	0 times (not at all)	0 times (not at all)	1 to 3 times	0 times (not at all)
3.8	1 to 3 times	1 to 3 times	1 to 3 times	4 to 6 times	1 to 3 times	0 glasses (not at all)	0 days (not at all)	4 to 6 times	0 times (not at all)	0 times (not at all)	1 to 3 times	1 to 3 times
2.7	1 to 3 times	1 to 3 times	0 times (not at all)	1 to 3 times	1 to 3 times	1 to 3 glasses	0 days (not at all)	4 to 6 times	1 to 3 times	0 times (not at all)	0 times (not at all)	1 to 3 times
4	1 to 3 times	1 to 3 times	1 to 3 times	0 times (not at all)	0 times (not at all)	0 glasses (not at all)	3 days	0 times (not at all)	0 times (not at all)	0 times (not at all)	0 times (not at all)	1 to 3 times
4	1 to 3 times	1 to 3 times	1 to 3 times	0 times (not at all)	1 to 3 times	0 glasses (not at all)	7 days (everyday)	0 times (not at all)	0 times (not at all)	0 times (not at all)	0 times (not at all)	1 to 3 times
3.5	1 to 3 times	1 to 3 times	1 to 3 times	0 times (not at all)	0 times (not at all)	1 to 3 glasses	3 days	1 to 3 times	0 times (not at all)	0 times (not at all)	4 to 6 times	1 to 3 times
4	1 to 3 times	1 to 3 times	1 to 3 times	0 times (not at all)	1 to 3 times	4 to 6 glasses	7 days (everyday)	0 times (not at all)	0 times (not at all)	0 times (not at all)	0 times (not at all)	1 to 3 times
3	1 to 3 times	1 to 3 times	1 to 3 times	0 times (not at all)	1 to 3 times	4 to 6 glasses	7 days (everyday)	0 times (not at all)	0 times (not at all)	0 times (not at all)	0 times (not at all)	1 to 3 times
3	1 to 3 times	1 to 3 times	1 to 3 times	0 times (not at all)	0 times (not at all)	4 to 6 glasses	2 days	7 to 10 times	0 times (not at all)	0 times (not at all)	1 to 3 times	4 to 6 times
3	1 to 3 times	1 to 3 times	1 to 3 times	1 to 3 times	1 to 3 times	0 glasses (not at all)	1 day	1 to 3 times	0 times (not at all)	0 times (not at all)	0 times (not at all)	1 to 3 times
3.8	1 to 3 times	1 to 3 times	4 to 6 times	1 to 3 times	1 to 3 times	0 glasses (not at all)	7 days (everyday)	1 to 3 times	1 to 3 times	0 times (not at all)	11 times or more	1 to 3 times
4	1 to 3 times	1 to 3 times	4 to 6 times	4 to 6 times	1 to 3 times	0 glasses (not at all)	5 days	0 times (not at all)	0 times (not at all)	0 times (not at all)	1 to 3 times	1 to 3 times
3.8	1 to 3 times	1 to 3 times	7 to 10 times	0 times (not at all)	0 times (not at all)	0 glasses (not at all)	7 days (everyday)	0 times (not at all)	0 times (not at all)	0 times (not at all)	0 times (not at all)	1 to 3 times
2.8	1 to 3 times	1 to 3 times	1 to 3 times	0 times (not at all)	4 to 6 times	1 to 3 glasses	5 days	1 to 3 times	0 times (not at all)	0 times (not at all)	0 times (not at all)	1 to 3 times
3.82	1 to 3 times	1 to 3 times	1 to 3 times	1 to 3 times	1 to 3 times	0 glasses (not at all)	5 days	0 times (not at all)	0 times (not at all)	0 times (not at all)	1 to 3 times	0 times (not at all)
3.7	1 to 3 times	1 to 3 times	1 to 3 times	0 times (not at all)	1 to 3 times	0 glasses (not at all)	7 days (everyday)	1 to 3 times	0 times (not at all)	0 times (not at all)	0 times (not at all)	1 to 3 times
2.9	1 to 3 times	1 to 3 times	1 to 3 times	1 to 3 times	1 to 3 times	0 glasses (not at all)	3 days	0 times (not at all)	1 to 3 times	0 times (not at all)	0 times (not at all)	1 to 3 times
0.57	1 to 3 times	1 to 3 times	1 to 3 times	1 to 3 times	0 times (not at all)	0 glasses (not at all)	2 days	1 to 3 times	0 times (not at all)	0 times (not at all)	0 times (not at all)	1 to 3 times
3.67	1 to 3 times	1 to 3 times	1 to 3 times	1 to 3 times	0 times (not at all)	0 glasses (not at all)	1 day	0 times (not at all)	0 times (not at all)	0 times (not at all)	0 times (not at all)	1 to 3 times
3.5	1 to 3 times	1 to 3 times	4 to 6 times	0 times (not at all)	0 times (not at all)	7 to 10 glasses	7 days (everyday)	0 times (not at all)	0 times (not at all)	0 times (not at all)	1 to 3 times	0 times (not at all)
2	1 to 3 times	1 to 3 times	0 times (not at all)	1 to 3 times	1 to 3 times	1 to 3 glasses	1 day	0 times (not at all)	0 times (not at all)	0 times (not at all)	1 to 3 times	1 to 3 times
3.2	1 to 3 times	1 to 3 times	1 to 3 times	1 to 3 times	0 times (not at all)	1 to 3 glasses	3 days	0 times (not at all)	1 to 3 times	4 to 6 times	1 to 3 times	1 to 3 times
3.6	1 to 3 times	1 to 3 times	1 to 3 times	0 times (not at all)	1 to 3 times	7 to 10 glasses	3 days	7 to 10 times	0 times (not at all)	4 to 6 times	0 times (not at all)	4 to 6 times
4	1 to 3 times	1 to 3 times	1 to 3 times	1 to 3 times	1 to 3 times	1 to 3 glasses	7 days (everyday)	0 times (not at all)	0 times (not at all)	0 times (not at all)	0 times (not at all)	0 times (not at all)
3.9	1 to 3 times	1 to 3 times	1 to 3 times	0 times (not at all)	1 to 3 times	0 glasses (not at all)	2 days	0 times (not at all)	0 times (not at all)	1 to 3 times	0 times (not at all)	4 to 6 times
3.8	1 to 3 times	1 to 3 times	1 to 3 times	4 to 6 times	1 to 3 times	0 glasses (not at all)	3 days	4 to 6 times	4 to 6 times	0 times (not at all)	1 to 3 times	1 to 3 times
4	1 to 3 times	1 to 3 times	4 to 6 times	0 times (not at all)	1 to 3 times	0 glasses (not at all)	5 days	0 times (not at all)	0 times (not at all)	0 times (not at all)	0 times (not at all)	4 to 6 times
3.7	1 to 3 times	1 to 3 times	1 to 3 times	0 times (not at all)	1 to 3 times	0 glasses (not at all)	0 days (not at all)	7 to 10 times	0 times (not at all)	0 times (not at all)	0 times (not at all)	1 to 3 times
3.674	1 to 3 times	1 to 3 times	0 times (not at all)	1 to 3 times	0 times (not at all)	1 to 3 glasses	2 days	11 times or more	0 times (not at all)	0 times (not at all)	1 to 3 times	4 to 6 times
2.5	1 to 3 times	1 to 3 times	0 times (not at all)	0 times (not at all)	1 to 3 times	0 glasses (not at all)	0 days (not at all)	4 to 6 times	4 to 6 times	0 times (not at all)	0 times (not at all)	7 to 10 times
3.4	1 to 3 times	1 to 3 times	4 to 6 times	1 to 3 times	1 to 3 times	0 glasses (not at all)	3 days	0 times (not at all)	0 times (not at all)	0 times (not at all)	0 times (not at all)	1 to 3 times
3.4	1 to 3 times	1 to 3 times	1 to 3 times	0 times (not at all)	0 times (not at all)	0 glasses (not at all)	7 days (everyday)	4 to 6 times	4 to 6 times	0 times (not at all)	0 times (not at all)	4 to 6 times
3.4	1 to 3 times	1 to 3 times	7 to 10 times	0 times (not at all)	1 to 3 times	0 glasses (not at all)	6 days	4 to 6 times	4 to 6 times	0 times (not at all)	0 times (not at all)	1 to 3 times
3.44	1 to 3 times	1 to 3 times	1 to 3 times	0 times (not at all)	1 to 3 times	0 glasses (not at all)	7 days (everyday)	1 to 3 times	1 to 3 times	0 times (not at all)	0 times (not at all)	1 to 3 times
3.5	1 to 3 times	1 to 3 times	1 to 3 times	1 to 3 times	1 to 3 times	1 to 3 glasses	2 days	1 to 3 times	0 times (not at all)	0 times (not at all)	0 times (not at all)	11 times or more
3.33	1 to 3 times	1 to 3 times	1 to 3 times	1 to 3 times	0 times (not at all)	1 to 3 glasses	7 days (everyday)	0 times (not at all)	0 times (not at all)	0 times (not at all)	4 to 6 times	1 to 3 times
3.4	1 to 3 times	1 to 3 times	4 to 6 times	0 times (not at all)	0 times (not at all)	1 to 3 glasses	5 days	1 to 3 times	0 times (not at all)	0 times (not at all)	1 to 3 times	1 to 3 times
4	1 to 3 times	1 to 3 times	1 to 3 times	0 times (not at all)	1 to 3 times	1 to 3 glasses	6 days	0 times (not at all)	0 times (not at all)	0 times (not at all)	4 to 6 times	0 times (not at all)
3.29	1 to 3 times	1 to 3 times	0 times (not at all)	0 times (not at all)	0 times (not at all)	0 glasses (not at all)	2 days	1 to 3 times	0 times (not at all)	1 to 3 times	0 times (not at all)	4 to 6 times
3.36	1 to 3 times	1 to 3 times	7 to 10 times	1 to 3 times	1 to 3 times	1 to 3 glasses	3 days	1 to 3 times	0 times (not at all)	0 times (not at all)	1 to 3 times	1 to 3 times
2.4	1 to 3 times	1 to 3 times	1 to 3 times	0 times (not at all)	1 to 3 times	1 to 3 glasses	0 days (not at all)	1 to 3 times	0 times (not at all)	0 times (not at all)	0 times (not at all)	4 to 6 times
3.2	1 to 3 times	1 to 3 times	4 to 6 times	0 times (not at all)	0 times (not at all)	0 glasses (not at all)	4 days	7 to 10 times	7 to 10 times	0 times (not at all)	0 times (not at all)	7 to 10 times
2.24	1 to 3 times	1 to 3 times	1 to 3 times	1 to 3 times	1 to 3 times	0 glasses (not at all)	3 days	0 times (not at all)	0 times (not at all)	1 to 3 times	0 times (not at all)	4 to 6 times
3.47	1 to 3 times	1 to 3 times	4 to 6 times	1 to 3 times	1 to 3 times	0 glasses (not at all)	2 days	1 to 3 times	0 times (not at all)	1 to 3 times	0 times (not at all)	4 to 6 times
3.8	1 to 3 times	1 to 3 times	1 to 3 times	11 times or more	0 times (not at all)	0 glasses (not at all)	0 days (not at all)	0 times (not at all)	0 times (not at all)	0 times (not at all)	1 to 3 times	1 to 3 times
3.6	1 to 3 times	1 to 3 times	4 to 6 times	4 to 6 times	1 to 3 times	1 to 3 glasses	7 days (everyday)	1 to 3 times	0 times (not at all)	0 times (not at all)	0 times (not at all)	1 to 3 times
3.5	1 to 3 times	1 to 3 times	0 times (not at all)	0 times (not at all)	0 times (not at all)	0 glasses (not at all)	7 days (everyday)	0 times (not at all)	0 times (not at all)	0 times (not at all)	0 times (not at all)	0 times (not at all)
3.51	1 to 3 times	1 to 3 times	1 to 3 times	0 times (not at all)	0 times (not at all)	0 glasses (not at all)	4 days	1 to 3 times	0 times (not at all)	0 times (not at all)	0 times (not at all)	0 times (not at all)
3.5	1 to 3 times	1 to 3 times	1 to 3 times	0 times (not at all)	1 to 3 times	1 to 3 glasses	1 day	0 times (not at all)	0 times (not at all)	0 times (not at all)	0 times (not at all)	1 to 3 times
3.5	1 to 3 times	1 to 3 times	4 to 6 times	0 times (not at all)	1 to 3 times	1 to 3 glasses	7 days (everyday)	0 times (not at all)	0 times (not at all)	0 times (not at all)	0 times (not at all)	0 times (not at all)
3.2	1 to 3 times	1 to 3 times	4 to 6 times	0 times (not at all)	1 to 3 times	1 to 3 glasses	7 days (everyday)	0 times (not at all)	0 times (not at all)	0 times (not at all)	0 times (not at all)	0 times (not at all)
3.6	1 to 3 times	1 to 3 times	0 times (not at all)	0 times (not at all)	1 to 3 times	4 to 6 glasses	0 days (not at all)	0 times (not at all)	0 times (not at all)	0 times (not at all)	0 times (not at all)	0 times (not at all)
2.9	1 to 3 times	1 to 3 times	1 to 3 times	0 times (not at all)	0 times (not at all)	0 glasses (not at all)	2 days	1 to 3 times	0 times (not at all)	0 times (not at all)	0 times (not at all)	1 to 3 times
3.12	1 to 3 times	1 to 3 times	4 to 6 times	4 to 6 times	7 to 10 times	1 to 3 glasses	7 days (everyday)	1 to 3 times	0 times (not at all)	0 times (not at all)	0 times (not at all)	1 to 3 times
3.3	1 to 3 times	1 to 3 times	1 to 3 times	0 times (not at all)	0 times (not at all)	1 to 3 glasses	0 days (not at all)	0 times (not at all)	0 times (not at all)	0 times (not at all)	0 times (not at all)	1 to 3 times
3.49	1 to 3 times	1 to 3 times	1 to 3 times	0 times (not at all)	0 times (not at all)	0 glasses (not at all)	7 days (everyday)	0 times (not at all)	0 times (not at all)	0 times (not at all)	1 to 3 times	1 to 3 times
3.8	1 to 3 times	1 to 3 times	1 to 3 times	0 times (not at all)	1 to 3 times	0 glasses (not at all)	5 days	0 times (not at all)	0 times (not at all)	0 times (not at all)	7 to 10 times	1 to 3 times
3.3	1 to 3 times	1 to 3 times	4 to 6 times	1 to 3 times	1 to 3 times	1 to 3 glasses	3 days	1 to 3 times	0 times (not at all)	0 times (not at all)	0 times (not at all)	1 to 3 times
2.87	1 to 3 times	1 to 3 times	0 times (not at all)	1 to 3 times	1 to 3 times	1 to 3 glasses	7 days (everyday)	0 times (not at all)	0 times (not at all)	0 times (not at all)	0 times (not at all)	1 to 3 times
3.83	1 to 3 times	1 to 3 times	0 times (not at all)	0 times (not at all)	0 times (not at all)	0 glasses (not at all)	4 days	7 to 10 times	0 times (not at all)	0 times (not at all)	0 times (not at all)	0 times (not at all)
3.87	1 to 3 times	1 to 3 times	1 to 3 times	1 to 3 times	0 times (not at all)	0 glasses (not at all)	7 days (everyday)	0 times (not at all)	0 times (not at all)	0 times (not at all)	0 times (not at all)	4 to 6 times
3	1 to 3 times	1 to 3 times	0 times (not at all)	1 to 3 times	0 times (not at all)	0 glasses (not at all)	3 days	1 to 3 times	0 times (not at all)	0 times (not at all)	1 to 3 times	1 to 3 times
3.3	1 to 3 times	1 to 3 times	4 to 6 times	4 to 6 times	1 to 3 times	0 glasses (not at all)	7 days (everyday)	1 to 3 times	0 times (not at all)	0 times (not at all)	0 times (not at all)	1 to 3 times
3.87	1 to 3 times	1 to 3 times	1 to 3 times	0 times (not at all)	1 to 3 times	1 to 3 glasses	4 days	0 times (not at all)	0 times (not at all)	0 times (not at all)	0 times (not at all)	1 to 3 times
3	1 to 3 times	1 to 3 times	1 to 3 times	1 to 3 times	1 to 3 times	0 glasses (not at all)	7 days (everyday)	1 to 3 times	0 times (not at all)	0 times (not at all)	0 times (not at all)	4 to 6 times
3.04	1 to 3 times	1 to 3 times	1 to 3 times	1 to 3 times	1 to 3 times	0 glasses (not at all)	3 days	0 times (not at all)	1 to 3 times	0 times (not at all)	0 times (not at all)	1 to 3 times
3.9	1 to 3 times	1 to 3 times	4 to 6 times	0 times (not at all)	0 times (not at all)	0 glasses (not at all)	2 days	0 times (not at all)	0 times (not at all)	0 times (not at all)	0 times (not at all)	1 to 3 times
3.45	1 to 3 times	1 to 3 times	0 times (not at all)	0 times (not at all)	1 to 3 times	0 glasses (not at all)	2 days	0 times (not at all)	1 to 3 times	1 to 3 times	0 times (not at all)	1 to 3 times
3.84	1 to 3 times	1 to 3 times	0 times (not at all)	0 times (not at all)	0 times (not at all)	0 glasses (not at all)	7 days (everyday)	0 times (not at all)	0 times (not at all)	0 times (not at all)	0 times (not at all)	0 times (not at all)
3.15	1 to 3 times	1 to 3 times	0 times (not at all)	0 times (not at all)	0 times (not at all)	1 to 3 glasses	5 days	1 to 3 times	0 times (not at all)	0 times (not at all)	0 times (not at all)	0 times (not at all)
2.5	1 to 3 times	1 to 3 times	1 to 3 times	0 times (not at all)	0 times (not at all)	0 glasses (not at all)	5 days	0 times (not at all)	0 times (not at all)	7 to 10 times	0 times (not at all)	1 to 3 times
3.4	1 to 3 times	1 to 3 times	1 to 3 times	1 to 3 times	0 times (not at all)	0 glasses (not at all)	6 days	1 to 3 times	0 times (not at all)	1 to 3 times	0 times (not at all)	1 to 3 times
3.4	1 to 3 times	1 to 3 times	0 times (not at all)	0 times (not at all)	1 to 3 times	0 glasses (not at all)	7 days (everyday)	11 times or more	0 times (not at all)	0 times (not at all)	1 to 3 times	1 to 3 times
2.6	1 to 3 times	1 to 3 times	1 to 3 times	0 times (not at all)	0 times (not at all)	0 glasses (not at all)	4 days	1 to 3 times	0 times (not at all)	0 times (not at all)	1 to 3 times	1 to 3 times
3.1	1 to 3 times	1 to 3 times	1 to 3 times	11 times or more	4 to 6 times	0 glasses (not at all)	3 days	7 to 10 times	0 times (not at all)	0 times (not at all)	0 times (not at all)	7 to 10 times
2.99	1 to 3 times	1 to 3 times	1 to 3 times	0 times (not at all)	0 times (not at all)	0 glasses (not at all)	3 days	0 times (not at all)	0 times (not at all)	0 times (not at all)	0 times (not at all)	4 to 6 times
3.4	1 to 3 times	1 to 3 times	1 to 3 times	4 to 6 times	0 times (not at all)	0 glasses (not at all)	3 days	4 to 6 times	0 times (not at all)	0 times (not at all)	0 times (not at all)	1 to 3 times
2.51	1 to 3 times	1 to 3 times	4 to 6 times	0 times (not at all)	1 to 3 times	0 glasses (not at all)	3 days	1 to 3 times	0 times (not at all)	11 times or more	1 to 3 times	1 to 3 times
3.2	1 to 3 times	1 to 3 times	4 to 6 times	0 times (not at all)	0 times (not at all)	4 to 6 glasses	4 days	0 times (not at all)	0 times (not at all)	4 to 6 times	0 times (not at all)	1 to 3 times
3.6	1 to 3 times	1 to 3 times	4 to 6 times	1 to 3 times	1 to 3 times	0 glasses (not at all)	7 days (everyday)	1 to 3 times	1 to 3 times	0 times (not at all)	0 times (not at all)	1 to 3 times
3.45	1 to 3 times	1 to 3 times	4 to 6 times	0 times (not at all)	0 times (not at all)	0 glasses (not at all)	7 days (everyday)	1 to 3 times	0 times (not at all)	0 times (not at all)	1 to 3 times	1 to 3 times
3.3	1 to 3 times	1 to 3 times	1 to 3 times	0 times (not at all)	0 times (not at all)	0 glasses (not at all)	0 days (not at all)	0 times (not at all)	0 times (not at all)	0 times (not at all)	0 times (not at all)	0 times (not at all)
3.76	1 to 3 times	1 to 3 times	4 to 6 times	1 to 3 times	1 to 3 times	1 to 3 glasses	1 day	4 to 6 times	0 times (not at all)	0 times (not at all)	1 to 3 times	1 to 3 times
3.92	1 to 3 times	1 to 3 times	1 to 3 times	0 times (not at all)	0 times (not at all)	0 glasses (not at all)	5 days	1 to 3 times	1 to 3 times	0 times (not at all)	1 to 3 times	1 to 3 times
3.56	1 to 3 times	1 to 3 times	1 to 3 times	1 to 3 times	4 to 6 times	1 to 3 glasses	2 days	0 times (not at all)	0 times (not at all)	0 times (not at all)	0 times (not at all)	1 to 3 times
2.9	1 to 3 times	1 to 3 times	0 times (not at all)	0 times (not at all)	0 times (not at all)	1 to 3 glasses	3 days	0 times (not at all)	0 times (not at all)	0 times (not at all)	0 times (not at all)	4 to 6 times
2.5	1 to 3 times	1 to 3 times	1 to 3 times	1 to 3 times	1 to 3 times	1 to 3 glasses	2 days	1 to 3 times	1 to 3 times	0 times (not at all)	0 times (not at all)	1 to 3 times
3.2	1 to 3 times	1 to 3 times	1 to 3 times	0 times (not at all)	0 times (not at all)	0 glasses (not at all)	0 days (not at all)	0 times (not at all)	4 to 6 times	1 to 3 times	0 times (not at all)	1 to 3 times
3.1	1 to 3 times	1 to 3 times	0 times (not at all)	0 times (not at all)	4 to 6 times	0 glasses (not at all)	2 days	1 to 3 times	1 to 3 times	0 times (not at all)	0 times (not at all)	4 to 6 times
2.69	1 to 3 times	1 to 3 times	1 to 3 times	4 to 6 times	1 to 3 times	1 to 3 glasses	0 days (not at all)	0 times (not at all)	0 times (not at all)	0 times (not at all)	0 times (not at all)	1 to 3 times
3.6	1 to 3 times	1 to 3 times	1 to 3 times	0 times (not at all)	0 times (not at all)	0 glasses (not at all)	7 days (everyday)	1 to 3 times	0 times (not at all)	0 times (not at all)	0 times (not at all)	0 times (not at all)
4	1 to 3 times	1 to 3 times	0 times (not at all)	1 to 3 times	1 to 3 times	0 glasses (not at all)	2 days	0 times (not at all)	0 times (not at all)	0 times (not at all)	1 to 3 times	4 to 6 times
3.721	1 to 3 times	1 to 3 times	4 to 6 times	1 to 3 times	1 to 3 times	4 to 6 glasses	2 days	0 times (not at all)	0 times (not at all)	0 times (not at all)	1 to 3 times	0 times (not at all)
3	1 to 3 times	1 to 3 times	1 to 3 times	1 to 3 times	1 to 3 times	4 to 6 glasses	3 days	1 to 3 times	1 to 3 times	1 to 3 times	1 to 3 times	1 to 3 times
3.61	1 to 3 times	1 to 3 times	4 to 6 times	1 to 3 times	1 to 3 times	1 to 3 glasses	4 days	0 times (not at all)	0 times (not at all)	0 times (not at all)	4 to 6 times	1 to 3 times
3.36	1 to 3 times	1 to 3 times	1 to 3 times	0 times (not at all)	0 times (not at all)	0 glasses (not at all)	7 days (everyday)	1 to 3 times	0 times (not at all)	0 times (not at all)	0 times (not at all)	1 to 3 times
3.2	1 to 3 times	1 to 3 times	1 to 3 times	4 to 6 times	1 to 3 times	0 glasses (not at all)	1 day	1 to 3 times	1 to 3 times	0 times (not at all)	1 to 3 times	4 to 6 times
3.78	1 to 3 times	1 to 3 times	4 to 6 times	0 times (not at all)	1 to 3 times	0 glasses (not at all)	7 days (everyday)	1 to 3 times	0 times (not at all)	0 times (not at all)	4 to 6 times	4 to 6 times
3.3	1 to 3 times	1 to 3 times	1 to 3 times	1 to 3 times	1 to 3 times	1 to 3 glasses	3 days	0 times (not at all)	0 times (not at all)	0 times (not at all)	1 to 3 times	1 to 3 times
3.2	1 to 3 times	1 to 3 times	1 to 3 times	4 to 6 times	1 to 3 times	7 to 10 glasses	5 days	7 to 10 times	0 times (not at all)	4 to 6 times	1 to 3 times	1 to 3 times
3.6	1 to 3 times	1 to 3 times	1 to 3 times	4 to 6 times	1 to 3 times	7 to 10 glasses	5 days	7 to 10 times	0 times (not at all)	4 to 6 times	1 to 3 times	1 to 3 times
3.78	1 to 3 times	1 to 3 times	0 times (not at all)	1 to 3 times	0 times (not at all)	4 to 6 glasses	3 days	0 times (not at all)	0 times (not at all)	0 times (not at all)	1 to 3 times	4 to 6 times
2.6	1 to 3 times	1 to 3 times	1 to 3 times	0 times (not at all)	1 to 3 times	4 to 6 glasses	1 day	1 to 3 times	0 times (not at all)	0 times (not at all)	0 times (not at all)	4 to 6 times
3.8	1 to 3 times	1 to 3 times	1 to 3 times	0 times (not at all)	1 to 3 times	0 glasses (not at all)	1 day	0 times (not at all)	0 times (not at all)	0 times (not at all)	1 to 3 times	1 to 3 times
3.9	1 to 3 times	1 to 3 times	1 to 3 times	0 times (not at all)	0 times (not at all)	0 glasses (not at all)	2 days	1 to 3 times	0 times (not at all)	0 times (not at all)	0 times (not at all)	4 to 6 times
3.83	1 to 3 times	1 to 3 times	0 times (not at all)	1 to 3 times	1 to 3 times	1 to 3 glasses	3 days	4 to 6 times	0 times (not at all)	0 times (not at all)	0 times (not at all)	1 to 3 times
3.4	1 to 3 times	1 to 3 times	1 to 3 times	0 times (not at all)	1 to 3 times	0 glasses (not at all)	5 days	1 to 3 times	0 times (not at all)	0 times (not at all)	0 times (not at all)	4 to 6 times
3.78	1 to 3 times	1 to 3 times	4 to 6 times	1 to 3 times	1 to 3 times	7 to 10 glasses	7 days (everyday)	0 times (not at all)	0 times (not at all)	0 times (not at all)	1 to 3 times	1 to 3 times
3.06	1 to 3 times	1 to 3 times	4 to 6 times	0 times (not at all)	1 to 3 times	1 to 3 glasses	3 days	11 times or more	0 times (not at all)	0 times (not at all)	4 to 6 times	4 to 6 times
3.893	1 to 3 times	1 to 3 times	4 to 6 times	4 to 6 times	4 to 6 times	0 glasses (not at all)	0 days (not at all)	0 times (not at all)	0 times (not at all)	0 times (not at all)	0 times (not at all)	1 to 3 times
3.2	1 to 3 times	1 to 3 times	7 to 10 times	0 times (not at all)	0 times (not at all)	0 glasses (not at all)	7 days (everyday)	0 times (not at all)	4 to 6 times	11 times or more	0 times (not at all)	4 to 6 times
3.9	1 to 3 times	1 to 3 times	4 to 6 times	1 to 3 times	0 times (not at all)	4 to 6 glasses	7 days (everyday)	0 times (not at all)	0 times (not at all)	0 times (not at all)	0 times (not at all)	0 times (not at all)
2.8	1 to 3 times	1 to 3 times	1 to 3 times	0 times (not at all)	0 times (not at all)	0 glasses (not at all)	0 days (not at all)	4 to 6 times	0 times (not at all)	7 to 10 times	1 to 3 times	4 to 6 times
2.89	1 to 3 times	1 to 3 times	7 to 10 times	1 to 3 times	1 to 3 times	1 to 3 glasses	4 days	1 to 3 times	1 to 3 times	0 times (not at all)	1 to 3 times	1 to 3 times
2	1 to 3 times	1 to 3 times	0 times (not at all)	0 times (not at all)	1 to 3 times	0 glasses (not at all)	0 days (not at all)	4 to 6 times	0 times (not at all)	0 times (not at all)	0 times (not at all)	1 to 3 times
4	1 to 3 times	1 to 3 times	1 to 3 times	0 times (not at all)	1 to 3 times	1 to 3 glasses	7 days (everyday)	4 to 6 times	0 times (not at all)	0 times (not at all)	0 times (not at all)	0 times (not at all)
3.3	1 to 3 times	1 to 3 times	1 to 3 times	0 times (not at all)	0 times (not at all)	0 glasses (not at all)	2 days	7 to 10 times	0 times (not at all)	0 times (not at all)	1 to 3 times	4 to 6 times
3.25	1 to 3 times	1 to 3 times	4 to 6 times	4 to 6 times	0 times (not at all)	1 to 3 glasses	3 days	1 to 3 times	0 times (not at all)	0 times (not at all)	0 times (not at all)	4 to 6 times
3.5	1 to 3 times	1 to 3 times	7 to 10 times	0 times (not at all)	0 times (not at all)	1 to 3 glasses	6 days	4 to 6 times	1 to 3 times	0 times (not at all)	0 times (not at all)	0 times (not at all)
3.24	1 to 3 times	1 to 3 times	4 to 6 times	4 to 6 times	0 times (not at all)	1 to 3 glasses	7 days (everyday)	1 to 3 times	7 to 10 times	0 times (not at all)	1 to 3 times	1 to 3 times
3.532	1 to 3 times	1 to 3 times	7 to 10 times	0 times (not at all)	0 times (not at all)	4 to 6 glasses	7 days (everyday)	1 to 3 times	1 to 3 times	0 times (not at all)	7 to 10 times	1 to 3 times
3.6	1 to 3 times	1 to 3 times	4 to 6 times	1 to 3 times	1 to 3 times	4 to 6 glasses	4 days	0 times (not at all)	0 times (not at all)	0 times (not at all)	0 times (not at all)	4 to 6 times
3.5	1 to 3 times	1 to 3 times	7 to 10 times	0 times (not at all)	1 to 3 times	0 glasses (not at all)	3 days	0 times (not at all)	0 times (not at all)	0 times (not at all)	0 times (not at all)	0 times (not at all)
3.89	1 to 3 times	1 to 3 times	1 to 3 times	0 times (not at all)	0 times (not at all)	1 to 3 glasses	3 days	1 to 3 times	0 times (not at all)	1 to 3 times	0 times (not at all)	1 to 3 times
3.1	1 to 3 times	1 to 3 times	1 to 3 times	1 to 3 times	1 to 3 times	1 to 3 glasses	0 days (not at all)	0 times (not at all)	0 times (not at all)	0 times (not at all)	1 to 3 times	1 to 3 times
3.16	1 to 3 times	1 to 3 times	7 to 10 times	0 times (not at all)	0 times (not at all)	0 glasses (not at all)	7 days (everyday)	1 to 3 times	0 times (not at all)	0 times (not at all)	0 times (not at all)	0 times (not at all)
3.37	1 to 3 times	1 to 3 times	0 times (not at all)	0 times (not at all)	1 to 3 times	1 to 3 glasses	7 days (everyday)	0 times (not at all)	0 times (not at all)	1 to 3 times	0 times (not at all)	1 to 3 times
4	1 to 3 times	1 to 3 times	1 to 3 times	0 times (not at all)	1 to 3 times	0 glasses (not at all)	2 days	1 to 3 times	0 times (not at all)	0 times (not at all)	1 to 3 times	4 to 6 times
3	1 to 3 times	1 to 3 times	1 to 3 times	11 times or more	0 times (not at all)	1 to 3 glasses	2 days	1 to 3 times	0 times (not at all)	0 times (not at all)	0 times (not at all)	1 to 3 times
3.1	1 to 3 times	1 to 3 times	1 to 3 times	1 to 3 times	0 times (not at all)	4 to 6 glasses	6 days	1 to 3 times	0 times (not at all)	0 times (not at all)	0 times (not at all)	1 to 3 times
3.97	1 to 3 times	1 to 3 times	1 to 3 times	0 times (not at all)	1 to 3 times	1 to 3 glasses	6 days	0 times (not at all)	0 times (not at all)	0 times (not at all)	0 times (not at all)	0 times (not at all)
3.8	1 to 3 times	1 to 3 times	1 to 3 times	0 times (not at all)	0 times (not at all)	1 to 3 glasses	1 day	0 times (not at all)	0 times (not at all)	0 times (not at all)	0 times (not at all)	0 times (not at all)
2.3	1 to 3 times	1 to 3 times	1 to 3 times	4 to 6 times	0 times (not at all)	0 glasses (not at all)	1 day	0 times (not at all)	0 times (not at all)	0 times (not at all)	1 to 3 times	4 to 6 times
3.5	1 to 3 times	1 to 3 times	1 to 3 times	1 to 3 times	0 times (not at all)	1 to 3 glasses	2 days	1 to 3 times	0 times (not at all)	0 times (not at all)	1 to 3 times	1 to 3 times
3	1 to 3 times	1 to 3 times	0 times (not at all)	1 to 3 times	1 to 3 times	0 glasses (not at all)	1 day	1 to 3 times	1 to 3 times	1 to 3 times	1 to 3 times	1 to 3 times
3.8	1 to 3 times	1 to 3 times	4 to 6 times	4 to 6 times	1 to 3 times	0 glasses (not at all)	2 days	1 to 3 times	0 times (not at all)	0 times (not at all)	0 times (not at all)	4 to 6 times
3.7	1 to 3 times	1 to 3 times	1 to 3 times	0 times (not at all)	0 times (not at all)	1 to 3 glasses	0 days (not at all)	1 to 3 times	0 times (not at all)	0 times (not at all)	0 times (not at all)	0 times (not at all)
3.477	1 to 3 times	1 to 3 times	1 to 3 times	1 to 3 times	1 to 3 times	0 glasses (not at all)	3 days	4 to 6 times	0 times (not at all)	0 times (not at all)	0 times (not at all)	1 to 3 times
3.77	1 to 3 times	1 to 3 times	1 to 3 times	0 times (not at all)	0 times (not at all)	0 glasses (not at all)	0 days (not at all)	1 to 3 times	0 times (not at all)	0 times (not at all)	0 times (not at all)	0 times (not at all)
3.5	1 to 3 times	1 to 3 times	1 to 3 times	0 times (not at all)	1 to 3 times	0 glasses (not at all)	7 days (everyday)	0 times (not at all)	0 times (not at all)	0 times (not at all)	1 to 3 times	0 times (not at all)
3.5	1 to 3 times	1 to 3 times	0 times (not at all)	0 times (not at all)	0 times (not at all)	1 to 3 glasses	3 days	0 times (not at all)	0 times (not at all)	0 times (not at all)	0 times (not at all)	4 to 6 times
3.1	1 to 3 times	1 to 3 times	7 to 10 times	1 to 3 times	1 to 3 times	4 to 6 glasses	3 days	0 times (not at all)	0 times (not at all)	0 times (not at all)	0 times (not at all)	0 times (not at all)
3.2	1 to 3 times	1 to 3 times	1 to 3 times	1 to 3 times	0 times (not at all)	0 glasses (not at all)	6 days	0 times (not at all)	0 times (not at all)	0 times (not at all)	0 times (not at all)	0 times (not at all)
3.7	1 to 3 times	1 to 3 times	1 to 3 times	1 to 3 times	0 times (not at all)	1 to 3 glasses	6 days	0 times (not at all)	0 times (not at all)	0 times (not at all)	4 to 6 times	4 to 6 times
3	1 to 3 times	1 to 3 times	0 times (not at all)	0 times (not at all)	0 times (not at all)	0 glasses (not at all)	7 days (everyday)	0 times (not at all)	0 times (not at all)	0 times (not at all)	0 times (not at all)	0 times (not at all)
4	1 to 3 times	1 to 3 times	0 times (not at all)	1 to 3 times	0 times (not at all)	4 to 6 glasses	3 days	4 to 6 times	0 times (not at all)	0 times (not at all)	4 to 6 times	1 to 3 times
4	1 to 3 times	1 to 3 times	1 to 3 times	0 times (not at all)	0 times (not at all)	0 glasses (not at all)	1 day	4 to 6 times	0 times (not at all)	1 to 3 times	1 to 3 times	4 to 6 times
3.89	1 to 3 times	1 to 3 times	1 to 3 times	1 to 3 times	4 to 6 times	1 to 3 glasses	3 days	1 to 3 times	1 to 3 times	0 times (not at all)	1 to 3 times	1 to 3 times
3.8	1 to 3 times	1 to 3 times	7 to 10 times	0 times (not at all)	1 to 3 times	0 glasses (not at all)	3 days	0 times (not at all)	0 times (not at all)	0 times (not at all)	0 times (not at all)	0 times (not at all)
3	1 to 3 times	1 to 3 times	1 to 3 times	0 times (not at all)	0 times (not at all)	0 glasses (not at all)	1 day	1 to 3 times	0 times (not at all)	0 times (not at all)	0 times (not at all)	1 to 3 times
3.4	1 to 3 times	1 to 3 times	1 to 3 times	0 times (not at all)	0 times (not at all)	0 glasses (not at all)	5 days	1 to 3 times	0 times (not at all)	0 times (not at all)	1 to 3 times	1 to 3 times
3	1 to 3 times	1 to 3 times	4 to 6 times	4 to 6 times	4 to 6 times	1 to 3 glasses	2 days	1 to 3 times	1 to 3 times	0 times (not at all)	7 to 10 times	0 times (not at all)
4	1 to 3 times	1 to 3 times	4 to 6 times	4 to 6 times	4 to 6 times	1 to 3 glasses	2 days	1 to 3 times	1 to 3 times	0 times (not at all)	7 to 10 times	0 times (not at all)
4	1 to 3 times	1 to 3 times	1 to 3 times	0 times (not at all)	0 times (not at all)	4 to 6 glasses	2 days	7 to 10 times	0 times (not at all)	0 times (not at all)	1 to 3 times	4 to 6 times
2.67	1 to 3 times	1 to 3 times	1 to 3 times	0 times (not at all)	0 times (not at all)	0 glasses (not at all)	1 day	4 to 6 times	0 times (not at all)	1 to 3 times	1 to 3 times	1 to 3 times
3.575	1 to 3 times	1 to 3 times	1 to 3 times	1 to 3 times	0 times (not at all)	4 to 6 glasses	7 days (everyday)	0 times (not at all)	0 times (not at all)	1 to 3 times	0 times (not at all)	4 to 6 times
3.7	1 to 3 times	1 to 3 times	4 to 6 times	1 to 3 times	1 to 3 times	1 to 3 glasses	6 days	4 to 6 times	0 times (not at all)	0 times (not at all)	1 to 3 times	4 to 6 times
3.3	1 to 3 times	1 to 3 times	1 to 3 times	0 times (not at all)	0 times (not at all)	0 glasses (not at all)	0 days (not at all)	0 times (not at all)	0 times (not at all)	0 times (not at all)	0 times (not at all)	1 to 3 times
2.8	1 to 3 times	1 to 3 times	1 to 3 times	0 times (not at all)	0 times (not at all)	0 glasses (not at all)	2 days	7 to 10 times	0 times (not at all)	0 times (not at all)	1 to 3 times	4 to 6 times
2.9	1 to 3 times	1 to 3 times	1 to 3 times	0 times (not at all)	0 times (not at all)	0 glasses (not at all)	1 day	4 to 6 times	0 times (not at all)	1 to 3 times	1 to 3 times	4 to 6 times
3	1 to 3 times	1 to 3 times	4 to 6 times	1 to 3 times	1 to 3 times	4 to 6 glasses	7 days (everyday)	1 to 3 times	0 times (not at all)	0 times (not at all)	7 to 10 times	0 times (not at all)
3.2	1 to 3 times	1 to 3 times	0 times (not at all)	1 to 3 times	0 times (not at all)	0 glasses (not at all)	4 days	1 to 3 times	0 times (not at all)	0 times (not at all)	0 times (not at all)	4 to 6 times
3.94	1 to 3 times	1 to 3 times	0 times (not at all)	4 to 6 times	0 times (not at all)	0 glasses (not at all)	1 day	1 to 3 times	0 times (not at all)	0 times (not at all)	1 to 3 times	4 to 6 times
3.94	1 to 3 times	1 to 3 times	1 to 3 times	1 to 3 times	1 to 3 times	1 to 3 glasses	2 days	1 to 3 times	1 to 3 times	0 times (not at all)	0 times (not at all)	1 to 3 times
3.9	1 to 3 times	1 to 3 times	7 to 10 times	1 to 3 times	0 times (not at all)	0 glasses (not at all)	7 days (everyday)	0 times (not at all)	0 times (not at all)	0 times (not at all)	0 times (not at all)	1 to 3 times
3	1 to 3 times	1 to 3 times	1 to 3 times	1 to 3 times	0 times (not at all)	1 to 3 glasses	2 days	1 to 3 times	0 times (not at all)	0 times (not at all)	1 to 3 times	4 to 6 times
3.45	1 to 3 times	1 to 3 times	1 to 3 times	0 times (not at all)	0 times (not at all)	4 to 6 glasses	4 days	1 to 3 times	0 times (not at all)	1 to 3 times	0 times (not at all)	7 to 10 times
3.5	1 to 3 times	1 to 3 times	1 to 3 times	0 times (not at all)	0 times (not at all)	4 to 6 glasses	0 days (not at all)	0 times (not at all)	0 times (not at all)	0 times (not at all)	0 times (not at all)	0 times (not at all)
3.75	1 to 3 times	1 to 3 times	4 to 6 times	1 to 3 times	0 times (not at all)	11 glasses or more	7 days (everyday)	1 to 3 times	0 times (not at all)	0 times (not at all)	0 times (not at all)	1 to 3 times
2.8	1 to 3 times	1 to 3 times	1 to 3 times	1 to 3 times	1 to 3 times	1 to 3 glasses	6 days	0 times (not at all)	0 times (not at all)	0 times (not at all)	11 times or more	1 to 3 times
3.49	1 to 3 times	1 to 3 times	0 times (not at all)	0 times (not at all)	0 times (not at all)	0 glasses (not at all)	1 day	7 to 10 times	0 times (not at all)	0 times (not at all)	0 times (not at all)	4 to 6 times
3	1 to 3 times	1 to 3 times	1 to 3 times	0 times (not at all)	0 times (not at all)	1 to 3 glasses	1 day	0 times (not at all)	0 times (not at all)	0 times (not at all)	0 times (not at all)	1 to 3 times
2.7	1 to 3 times	1 to 3 times	1 to 3 times	0 times (not at all)	1 to 3 times	0 glasses (not at all)	0 days (not at all)	1 to 3 times	0 times (not at all)	0 times (not at all)	4 to 6 times	1 to 3 times
3.75	1 to 3 times	1 to 3 times	1 to 3 times	1 to 3 times	1 to 3 times	1 to 3 glasses	3 days	0 times (not at all)	1 to 3 times	0 times (not at all)	0 times (not at all)	1 to 3 times
3.668	1 to 3 times	1 to 3 times	1 to 3 times	0 times (not at all)	0 times (not at all)	0 glasses (not at all)	2 days	4 to 6 times	0 times (not at all)	0 times (not at all)	7 to 10 times	1 to 3 times
2.6	1 to 3 times	1 to 3 times	0 times (not at all)	0 times (not at all)	0 times (not at all)	0 glasses (not at all)	0 days (not at all)	0 times (not at all)	0 times (not at all)	0 times (not at all)	0 times (not at all)	0 times (not at all)
2.68	1 to 3 times	1 to 3 times	1 to 3 times	1 to 3 times	1 to 3 times	1 to 3 glasses	7 days (everyday)	1 to 3 times	0 times (not at all)	0 times (not at all)	0 times (not at all)	1 to 3 times
2.7	1 to 3 times	1 to 3 times	1 to 3 times	4 to 6 times	0 times (not at all)	0 glasses (not at all)	2 days	1 to 3 times	1 to 3 times	1 to 3 times	0 times (not at all)	1 to 3 times
3.05	1 to 3 times	1 to 3 times	1 to 3 times	1 to 3 times	0 times (not at all)	7 to 10 glasses	7 days (everyday)	1 to 3 times	0 times (not at all)	0 times (not at all)	0 times (not at all)	1 to 3 times
3.5	1 to 3 times	1 to 3 times	4 to 6 times	1 to 3 times	1 to 3 times	4 to 6 glasses	4 days	4 to 6 times	0 times (not at all)	0 times (not at all)	11 times or more	1 to 3 times
3.9	1 to 3 times	1 to 3 times	4 to 6 times	0 times (not at all)	1 to 3 times	1 to 3 glasses	7 days (everyday)	0 times (not at all)	0 times (not at all)	0 times (not at all)	4 to 6 times	1 to 3 times
2.7	1 to 3 times	1 to 3 times	1 to 3 times	0 times (not at all)	7 to 10 times	0 glasses (not at all)	3 days	1 to 3 times	0 times (not at all)	1 to 3 times	7 to 10 times	1 to 3 times
2.8	1 to 3 times	1 to 3 times	4 to 6 times	0 times (not at all)	0 times (not at all)	1 to 3 glasses	0 days (not at all)	0 times (not at all)	7 to 10 times	1 to 3 times	1 to 3 times	7 to 10 times
4	11 times or more	11 times or more	7 to 10 times	1 to 3 times	1 to 3 times	0 glasses (not at all)	5 days	0 times (not at all)	0 times (not at all)	0 times (not at all)	0 times (not at all)	0 times (not at all)
3.13	11 times or more	11 times or more	4 to 6 times	4 to 6 times	4 to 6 times	0 glasses (not at all)	1 day	1 to 3 times	0 times (not at all)	1 to 3 times	0 times (not at all)	0 times (not at all)
4.48	11 times or more	11 times or more	11 times or more	0 times (not at all)	4 to 6 times	0 glasses (not at all)	6 days	0 times (not at all)	0 times (not at all)	0 times (not at all)	0 times (not at all)	0 times (not at all)
4	11 times or more	11 times or more	11 times or more	7 to 10 times	1 to 3 times	0 glasses (not at all)	4 days	0 times (not at all)	0 times (not at all)	0 times (not at all)	0 times (not at all)	1 to 3 times
3.3	11 times or more	11 times or more	7 to 10 times	0 times (not at all)	1 to 3 times	0 glasses (not at all)	1 day	0 times (not at all)	0 times (not at all)	0 times (not at all)	1 to 3 times	1 to 3 times
2.8	11 times or more	11 times or more	11 times or more	7 to 10 times	4 to 6 times	0 glasses (not at all)	7 days (everyday)	0 times (not at all)	0 times (not at all)	0 times (not at all)	1 to 3 times	0 times (not at all)
0.4	11 times or more	11 times or more	1 to 3 times	0 times (not at all)	7 to 10 times	0 glasses (not at all)	1 day	0 times (not at all)	0 times (not at all)	0 times (not at all)	0 times (not at all)	1 to 3 times
3.7	11 times or more	11 times or more	4 to 6 times	1 to 3 times	1 to 3 times	0 glasses (not at all)	3 days	0 times (not at all)	0 times (not at all)	4 to 6 times	1 to 3 times	1 to 3 times
3.1	11 times or more	11 times or more	7 to 10 times	1 to 3 times	1 to 3 times	0 glasses (not at all)	5 days	0 times (not at all)	0 times (not at all)	0 times (not at all)	0 times (not at all)	0 times (not at all)
3.97	11 times or more	11 times or more	11 times or more	0 times (not at all)	1 to 3 times	0 glasses (not at all)	7 days (everyday)	0 times (not at all)	0 times (not at all)	0 times (not at all)	1 to 3 times	0 times (not at all)
3.5	11 times or more	11 times or more	11 times or more	0 times (not at all)	7 to 10 times	1 to 3 glasses	7 days (everyday)	0 times (not at all)	0 times (not at all)	0 times (not at all)	0 times (not at all)	0 times (not at all)
3.5	11 times or more	11 times or more	11 times or more	0 times (not at all)	4 to 6 times	1 to 3 glasses	6 days	1 to 3 times	0 times (not at all)	0 times (not at all)	1 to 3 times	1 to 3 times
3.1	11 times or more	11 times or more	1 to 3 times	1 to 3 times	0 times (not at all)	0 glasses (not at all)	3 days	0 times (not at all)	0 times (not at all)	0 times (not at all)	0 times (not at all)	1 to 3 times
4	11 times or more	11 times or more	11 times or more	11 times or more	11 times or more	4 to 6 glasses	7 days (everyday)	0 times (not at all)	0 times (not at all)	0 times (not at all)	0 times (not at all)	1 to 3 times
2.74	11 times or more	11 times or more	11 times or more	0 times (not at all)	0 times (not at all)	0 glasses (not at all)	7 days (everyday)	1 to 3 times	1 to 3 times	0 times (not at all)	0 times (not at all)	0 times (not at all)
3.5	11 times or more	11 times or more	11 times or more	0 times (not at all)	0 times (not at all)	0 glasses (not at all)	7 days (everyday)	1 to 3 times	1 to 3 times	0 times (not at all)	0 times (not at all)	0 times (not at all)
3.43	11 times or more	11 times or more	1 to 3 times	1 to 3 times	1 to 3 times	0 glasses (not at all)	3 days	0 times (not at all)	1 to 3 times	0 times (not at all)	0 times (not at all)	1 to 3 times
3.97	11 times or more	11 times or more	11 times or more	0 times (not at all)	0 times (not at all)	0 glasses (not at all)	7 days (everyday)	1 to 3 times	0 times (not at all)	0 times (not at all)	0 times (not at all)	0 times (not at all)
3	11 times or more	11 times or more	11 times or more	1 to 3 times	7 to 10 times	0 glasses (not at all)	7 days (everyday)	0 times (not at all)	0 times (not at all)	0 times (not at all)	0 times (not at all)	0 times (not at all)
3.5	11 times or more	11 times or more	11 times or more	0 times (not at all)	7 to 10 times	0 glasses (not at all)	7 days (everyday)	0 times (not at all)	0 times (not at all)	0 times (not at all)	1 to 3 times	0 times (not at all)
3.5	11 times or more	11 times or more	11 times or more	0 times (not at all)	7 to 10 times	0 glasses (not at all)	7 days (everyday)	0 times (not at all)	0 times (not at all)	0 times (not at all)	0 times (not at all)	0 times (not at all)
3.57	11 times or more	11 times or more	7 to 10 times	0 times (not at all)	7 to 10 times	0 glasses (not at all)	7 days (everyday)	0 times (not at all)	0 times (not at all)	0 times (not at all)	0 times (not at all)	0 times (not at all)
3.84	11 times or more	11 times or more	11 times or more	0 times (not at all)	1 to 3 times	7 to 10 glasses	7 days (everyday)	0 times (not at all)	0 times (not at all)	0 times (not at all)	0 times (not at all)	0 times (not at all)
3.92	11 times or more	11 times or more	11 times or more	0 times (not at all)	4 to 6 times	0 glasses (not at all)	7 days (everyday)	0 times (not at all)	0 times (not at all)	0 times (not at all)	0 times (not at all)	0 times (not at all)
2.49	11 times or more	11 times or more	4 to 6 times	1 to 3 times	1 to 3 times	1 to 3 glasses	7 days (everyday)	0 times (not at all)	0 times (not at all)	0 times (not at all)	0 times (not at all)	0 times (not at all)
3.5	11 times or more	11 times or more	4 to 6 times	0 times (not at all)	4 to 6 times	1 to 3 glasses	7 days (everyday)	0 times (not at all)	0 times (not at all)	0 times (not at all)	0 times (not at all)	0 times (not at all)
3.86	11 times or more	11 times or more	11 times or more	0 times (not at all)	4 to 6 times	0 glasses (not at all)	7 days (everyday)	0 times (not at all)	0 times (not at all)	0 times (not at all)	0 times (not at all)	1 to 3 times
4	11 times or more	11 times or more	11 times or more	0 times (not at all)	1 to 3 times	0 glasses (not at all)	7 days (everyday)	0 times (not at all)	0 times (not at all)	0 times (not at all)	0 times (not at all)	0 times (not at all)
3.45	11 times or more	11 times or more	11 times or more	1 to 3 times	4 to 6 times	0 glasses (not at all)	2 days	0 times (not at all)	0 times (not at all)	0 times (not at all)	1 to 3 times	1 to 3 times
3.2	11 times or more	11 times or more	11 times or more	0 times (not at all)	11 times or more	0 glasses (not at all)	1 day	0 times (not at all)	0 times (not at all)	0 times (not at all)	0 times (not at all)	0 times (not at all)
2.6	11 times or more	11 times or more	7 to 10 times	4 to 6 times	4 to 6 times	1 to 3 glasses	7 days (everyday)	1 to 3 times	0 times (not at all)	0 times (not at all)	0 times (not at all)	1 to 3 times
3.5	11 times or more	11 times or more	7 to 10 times	0 times (not at all)	11 times or more	1 to 3 glasses	7 days (everyday)	0 times (not at all)	0 times (not at all)	0 times (not at all)	0 times (not at all)	0 times (not at all)
3.8	11 times or more	11 times or more	7 to 10 times	0 times (not at all)	4 to 6 times	0 glasses (not at all)	3 days	0 times (not at all)	4 to 6 times	0 times (not at all)	0 times (not at all)	4 to 6 times
3.7	11 times or more	11 times or more	4 to 6 times	0 times (not at all)	4 to 6 times	0 glasses (not at all)	7 days (everyday)	1 to 3 times	0 times (not at all)	0 times (not at all)	0 times (not at all)	0 times (not at all)
3.47	11 times or more	11 times or more	11 times or more	0 times (not at all)	11 times or more	0 glasses (not at all)	7 days (everyday)	0 times (not at all)	0 times (not at all)	0 times (not at all)	0 times (not at all)	0 times (not at all)
3	11 times or more	11 times or more	11 times or more	0 times (not at all)	11 times or more	0 glasses (not at all)	7 days (everyday)	0 times (not at all)	0 times (not at all)	0 times (not at all)	0 times (not at all)	0 times (not at all)
3.4	11 times or more	11 times or more	4 to 6 times	0 times (not at all)	11 times or more	1 to 3 glasses	6 days	0 times (not at all)	0 times (not at all)	0 times (not at all)	0 times (not at all)	1 to 3 times
3.5	11 times or more	11 times or more	7 to 10 times	0 times (not at all)	1 to 3 times	0 glasses (not at all)	7 days (everyday)	0 times (not at all)	0 times (not at all)	0 times (not at all)	0 times (not at all)	0 times (not at all)
2.48	11 times or more	11 times or more	11 times or more	4 to 6 times	4 to 6 times	0 glasses (not at all)	2 days	0 times (not at all)	0 times (not at all)	0 times (not at all)	0 times (not at all)	1 to 3 times
2.8	11 times or more	11 times or more	1 to 3 times	0 times (not at all)	4 to 6 times	0 glasses (not at all)	2 days	0 times (not at all)	0 times (not at all)	0 times (not at all)	0 times (not at all)	1 to 3 times
3.46	11 times or more	11 times or more	0 times (not at all)	0 times (not at all)	1 to 3 times	0 glasses (not at all)	7 days (everyday)	4 to 6 times	0 times (not at all)	0 times (not at all)	1 to 3 times	0 times (not at all)
2.8	11 times or more	11 times or more	4 to 6 times	0 times (not at all)	1 to 3 times	0 glasses (not at all)	5 days	4 to 6 times	4 to 6 times	0 times (not at all)	0 times (not at all)	1 to 3 times
3.78	11 times or more	11 times or more	11 times or more	0 times (not at all)	11 times or more	0 glasses (not at all)	7 days (everyday)	4 to 6 times	1 to 3 times	1 to 3 times	0 times (not at all)	0 times (not at all)
3.75	11 times or more	11 times or more	11 times or more	4 to 6 times	4 to 6 times	1 to 3 glasses	7 days (everyday)	0 times (not at all)	0 times (not at all)	0 times (not at all)	1 to 3 times	0 times (not at all)
4	11 times or more	11 times or more	1 to 3 times	7 to 10 times	7 to 10 times	11 glasses or more	2 days	4 to 6 times	4 to 6 times	4 to 6 times	4 to 6 times	1 to 3 times
3.23	11 times or more	11 times or more	1 to 3 times	1 to 3 times	7 to 10 times	1 to 3 glasses	7 days (everyday)	0 times (not at all)	0 times (not at all)	0 times (not at all)	0 times (not at all)	0 times (not at all)
3.67	11 times or more	11 times or more	4 to 6 times	0 times (not at all)	7 to 10 times	0 glasses (not at all)	7 days (everyday)	0 times (not at all)	0 times (not at all)	0 times (not at all)	1 to 3 times	1 to 3 times
3.7	11 times or more	11 times or more	4 to 6 times	1 to 3 times	1 to 3 times	1 to 3 glasses	7 days (everyday)	0 times (not at all)	0 times (not at all)	0 times (not at all)	1 to 3 times	4 to 6 times
3.3	11 times or more	11 times or more	4 to 6 times	0 times (not at all)	11 times or more	1 to 3 glasses	1 day	1 to 3 times	0 times (not at all)	0 times (not at all)	0 times (not at all)	1 to 3 times
4	11 times or more	11 times or more	7 to 10 times	4 to 6 times	1 to 3 times	7 to 10 glasses	7 days (everyday)	0 times (not at all)	0 times (not at all)	0 times (not at all)	0 times (not at all)	0 times (not at all)
3.5	11 times or more	11 times or more	11 times or more	0 times (not at all)	7 to 10 times	0 glasses (not at all)	7 days (everyday)	0 times (not at all)	0 times (not at all)	0 times (not at all)	0 times (not at all)	0 times (not at all)
3.56	11 times or more	11 times or more	7 to 10 times	1 to 3 times	0 times (not at all)	1 to 3 glasses	7 days (everyday)	0 times (not at all)	0 times (not at all)	4 to 6 times	4 to 6 times	0 times (not at all)
2.68	11 times or more	11 times or more	7 to 10 times	1 to 3 times	4 to 6 times	0 glasses (not at all)	2 days	1 to 3 times	0 times (not at all)	0 times (not at all)	0 times (not at all)	4 to 6 times
3.75	4 to 6 times	4 to 6 times	7 to 10 times	4 to 6 times	1 to 3 times	4 to 6 glasses	7 days (everyday)	1 to 3 times	0 times (not at all)	0 times (not at all)	0 times (not at all)	1 to 3 times
3.2	4 to 6 times	4 to 6 times	1 to 3 times	1 to 3 times	1 to 3 times	0 glasses (not at all)	7 days (everyday)	0 times (not at all)	0 times (not at all)	0 times (not at all)	0 times (not at all)	1 to 3 times
4	4 to 6 times	4 to 6 times	4 to 6 times	0 times (not at all)	4 to 6 times	1 to 3 glasses	7 days (everyday)	0 times (not at all)	0 times (not at all)	0 times (not at all)	0 times (not at all)	0 times (not at all)
3.47	4 to 6 times	4 to 6 times	4 to 6 times	1 to 3 times	4 to 6 times	0 glasses (not at all)	3 days	1 to 3 times	0 times (not at all)	0 times (not at all)	1 to 3 times	1 to 3 times
3.6	4 to 6 times	4 to 6 times	4 to 6 times	7 to 10 times	1 to 3 times	0 glasses (not at all)	7 days (everyday)	1 to 3 times	0 times (not at all)	0 times (not at all)	1 to 3 times	0 times (not at all)
2.7	4 to 6 times	4 to 6 times	4 to 6 times	1 to 3 times	1 to 3 times	4 to 6 glasses	1 day	0 times (not at all)	0 times (not at all)	0 times (not at all)	0 times (not at all)	0 times (not at all)
4	4 to 6 times	4 to 6 times	1 to 3 times	0 times (not at all)	1 to 3 times	0 glasses (not at all)	5 days	4 to 6 times	4 to 6 times	0 times (not at all)	1 to 3 times	1 to 3 times
3.45	4 to 6 times	4 to 6 times	1 to 3 times	1 to 3 times	7 to 10 times	1 to 3 glasses	7 days (everyday)	0 times (not at all)	0 times (not at all)	0 times (not at all)	0 times (not at all)	1 to 3 times
4	4 to 6 times	4 to 6 times	4 to 6 times	7 to 10 times	4 to 6 times	0 glasses (not at all)	7 days (everyday)	0 times (not at all)	0 times (not at all)	0 times (not at all)	0 times (not at all)	1 to 3 times
3.8	4 to 6 times	4 to 6 times	1 to 3 times	0 times (not at all)	1 to 3 times	0 glasses (not at all)	7 days (everyday)	11 times or more	0 times (not at all)	0 times (not at all)	0 times (not at all)	1 to 3 times
2.3	4 to 6 times	4 to 6 times	7 to 10 times	1 to 3 times	0 times (not at all)	0 glasses (not at all)	6 days	0 times (not at all)	0 times (not at all)	0 times (not at all)	1 to 3 times	4 to 6 times
2.5	4 to 6 times	4 to 6 times	1 to 3 times	0 times (not at all)	1 to 3 times	0 glasses (not at all)	7 days (everyday)	0 times (not at all)	0 times (not at all)	0 times (not at all)	0 times (not at all)	1 to 3 times
1.65	4 to 6 times	4 to 6 times	7 to 10 times	1 to 3 times	1 to 3 times	1 to 3 glasses	3 days	0 times (not at all)	0 times (not at all)	0 times (not at all)	0 times (not at all)	7 to 10 times
3.6	4 to 6 times	4 to 6 times	1 to 3 times	0 times (not at all)	1 to 3 times	1 to 3 glasses	1 day	4 to 6 times	0 times (not at all)	0 times (not at all)	1 to 3 times	1 to 3 times
3.7	4 to 6 times	4 to 6 times	1 to 3 times	0 times (not at all)	0 times (not at all)	0 glasses (not at all)	6 days	4 to 6 times	0 times (not at all)	0 times (not at all)	0 times (not at all)	1 to 3 times
3.4	4 to 6 times	4 to 6 times	1 to 3 times	1 to 3 times	4 to 6 times	0 glasses (not at all)	0 days (not at all)	0 times (not at all)	0 times (not at all)	0 times (not at all)	0 times (not at all)	1 to 3 times
3.7	4 to 6 times	4 to 6 times	1 to 3 times	4 to 6 times	1 to 3 times	0 glasses (not at all)	7 days (everyday)	0 times (not at all)	0 times (not at all)	0 times (not at all)	1 to 3 times	0 times (not at all)
3.6	4 to 6 times	4 to 6 times	7 to 10 times	0 times (not at all)	1 to 3 times	0 glasses (not at all)	7 days (everyday)	0 times (not at all)	0 times (not at all)	0 times (not at all)	0 times (not at all)	11 times or more
3	4 to 6 times	4 to 6 times	4 to 6 times	0 times (not at all)	1 to 3 times	1 to 3 glasses	4 days	0 times (not at all)	0 times (not at all)	0 times (not at all)	4 to 6 times	4 to 6 times
3.2	4 to 6 times	4 to 6 times	4 to 6 times	1 to 3 times	0 times (not at all)	0 glasses (not at all)	7 days (everyday)	1 to 3 times	1 to 3 times	0 times (not at all)	4 to 6 times	1 to 3 times
3.8	4 to 6 times	4 to 6 times	7 to 10 times	1 to 3 times	4 to 6 times	0 glasses (not at all)	3 days	0 times (not at all)	0 times (not at all)	0 times (not at all)	1 to 3 times	1 to 3 times
4	4 to 6 times	4 to 6 times	7 to 10 times	1 to 3 times	1 to 3 times	0 glasses (not at all)	6 days	1 to 3 times	0 times (not at all)	0 times (not at all)	1 to 3 times	1 to 3 times
2.5	4 to 6 times	4 to 6 times	0 times (not at all)	1 to 3 times	1 to 3 times	0 glasses (not at all)	3 days	0 times (not at all)	0 times (not at all)	0 times (not at all)	1 to 3 times	1 to 3 times
4	4 to 6 times	4 to 6 times	4 to 6 times	4 to 6 times	0 times (not at all)	7 to 10 glasses	4 days	1 to 3 times	0 times (not at all)	0 times (not at all)	4 to 6 times	0 times (not at all)
3.56	4 to 6 times	4 to 6 times	4 to 6 times	1 to 3 times	1 to 3 times	0 glasses (not at all)	4 days	0 times (not at all)	0 times (not at all)	0 times (not at all)	7 to 10 times	0 times (not at all)
4	4 to 6 times	4 to 6 times	4 to 6 times	0 times (not at all)	0 times (not at all)	1 to 3 glasses	5 days	0 times (not at all)	0 times (not at all)	0 times (not at all)	1 to 3 times	1 to 3 times
4	4 to 6 times	4 to 6 times	7 to 10 times	0 times (not at all)	0 times (not at all)	0 glasses (not at all)	0 days (not at all)	7 to 10 times	7 to 10 times	0 times (not at all)	1 to 3 times	1 to 3 times
3.5	4 to 6 times	4 to 6 times	1 to 3 times	1 to 3 times	0 times (not at all)	0 glasses (not at all)	2 days	1 to 3 times	1 to 3 times	0 times (not at all)	1 to 3 times	1 to 3 times
3	4 to 6 times	4 to 6 times	1 to 3 times	0 times (not at all)	0 times (not at all)	0 glasses (not at all)	7 days (everyday)	7 to 10 times	0 times (not at all)	0 times (not at all)	0 times (not at all)	1 to 3 times
4	4 to 6 times	4 to 6 times	7 to 10 times	0 times (not at all)	1 to 3 times	0 glasses (not at all)	5 days	0 times (not at all)	0 times (not at all)	0 times (not at all)	0 times (not at all)	0 times (not at all)
3.75	4 to 6 times	4 to 6 times	4 to 6 times	0 times (not at all)	4 to 6 times	0 glasses (not at all)	7 days (everyday)	0 times (not at all)	0 times (not at all)	0 times (not at all)	0 times (not at all)	0 times (not at all)
3	4 to 6 times	4 to 6 times	1 to 3 times	1 to 3 times	1 to 3 times	0 glasses (not at all)	2 days	1 to 3 times	1 to 3 times	1 to 3 times	1 to 3 times	4 to 6 times
3.01	4 to 6 times	4 to 6 times	7 to 10 times	4 to 6 times	1 to 3 times	0 glasses (not at all)	2 days	1 to 3 times	0 times (not at all)	0 times (not at all)	1 to 3 times	1 to 3 times
3.3	4 to 6 times	4 to 6 times	1 to 3 times	0 times (not at all)	0 times (not at all)	0 glasses (not at all)	2 days	1 to 3 times	7 to 10 times	0 times (not at all)	0 times (not at all)	1 to 3 times
3.5	4 to 6 times	4 to 6 times	7 to 10 times	4 to 6 times	1 to 3 times	1 to 3 glasses	4 days	1 to 3 times	0 times (not at all)	0 times (not at all)	0 times (not at all)	1 to 3 times
3.8	4 to 6 times	4 to 6 times	1 to 3 times	0 times (not at all)	1 to 3 times	0 glasses (not at all)	5 days	0 times (not at all)	0 times (not at all)	0 times (not at all)	0 times (not at all)	4 to 6 times
3.6	4 to 6 times	4 to 6 times	4 to 6 times	4 to 6 times	4 to 6 times	0 glasses (not at all)	1 day	0 times (not at all)	0 times (not at all)	0 times (not at all)	1 to 3 times	0 times (not at all)
4	4 to 6 times	4 to 6 times	7 to 10 times	1 to 3 times	1 to 3 times	0 glasses (not at all)	1 day	1 to 3 times	0 times (not at all)	4 to 6 times	0 times (not at all)	1 to 3 times
3.8	4 to 6 times	4 to 6 times	1 to 3 times	4 to 6 times	1 to 3 times	0 glasses (not at all)	2 days	0 times (not at all)	0 times (not at all)	0 times (not at all)	1 to 3 times	1 to 3 times
3.4	4 to 6 times	4 to 6 times	1 to 3 times	0 times (not at all)	1 to 3 times	0 glasses (not at all)	2 days	0 times (not at all)	0 times (not at all)	0 times (not at all)	0 times (not at all)	1 to 3 times
3.67	4 to 6 times	4 to 6 times	7 to 10 times	1 to 3 times	1 to 3 times	0 glasses (not at all)	2 days	0 times (not at all)	0 times (not at all)	0 times (not at all)	1 to 3 times	4 to 6 times
3.5	4 to 6 times	4 to 6 times	4 to 6 times	0 times (not at all)	1 to 3 times	1 to 3 glasses	7 days (everyday)	0 times (not at all)	0 times (not at all)	0 times (not at all)	0 times (not at all)	0 times (not at all)
4	4 to 6 times	4 to 6 times	4 to 6 times	4 to 6 times	1 to 3 times	4 to 6 glasses	7 days (everyday)	1 to 3 times	0 times (not at all)	1 to 3 times	4 to 6 times	1 to 3 times
3.5	4 to 6 times	4 to 6 times	1 to 3 times	0 times (not at all)	0 times (not at all)	1 to 3 glasses	3 days	1 to 3 times	1 to 3 times	0 times (not at all)	1 to 3 times	1 to 3 times
4	4 to 6 times	4 to 6 times	1 to 3 times	1 to 3 times	0 times (not at all)	1 to 3 glasses	0 days (not at all)	1 to 3 times	1 to 3 times	0 times (not at all)	0 times (not at all)	4 to 6 times
4	4 to 6 times	4 to 6 times	4 to 6 times	0 times (not at all)	1 to 3 times	0 glasses (not at all)	1 day	0 times (not at all)	0 times (not at all)	0 times (not at all)	0 times (not at all)	4 to 6 times
4	4 to 6 times	4 to 6 times	7 to 10 times	0 times (not at all)	0 times (not at all)	0 glasses (not at all)	2 days	0 times (not at all)	0 times (not at all)	0 times (not at all)	0 times (not at all)	1 to 3 times
4	4 to 6 times	4 to 6 times	7 to 10 times	0 times (not at all)	1 to 3 times	0 glasses (not at all)	6 days	0 times (not at all)	0 times (not at all)	0 times (not at all)	4 to 6 times	4 to 6 times
3.927	4 to 6 times	4 to 6 times	11 times or more	0 times (not at all)	1 to 3 times	0 glasses (not at all)	7 days (everyday)	0 times (not at all)	0 times (not at all)	0 times (not at all)	0 times (not at all)	0 times (not at all)
3.4	4 to 6 times	4 to 6 times	1 to 3 times	1 to 3 times	4 to 6 times	4 to 6 glasses	5 days	0 times (not at all)	0 times (not at all)	0 times (not at all)	1 to 3 times	1 to 3 times
3.64	4 to 6 times	4 to 6 times	0 times (not at all)	0 times (not at all)	4 to 6 times	0 glasses (not at all)	3 days	0 times (not at all)	7 to 10 times	0 times (not at all)	0 times (not at all)	1 to 3 times
2.5	4 to 6 times	4 to 6 times	11 times or more	1 to 3 times	1 to 3 times	0 glasses (not at all)	4 days	4 to 6 times	0 times (not at all)	0 times (not at all)	1 to 3 times	1 to 3 times
3	4 to 6 times	4 to 6 times	7 to 10 times	1 to 3 times	1 to 3 times	1 to 3 glasses	7 days (everyday)	0 times (not at all)	0 times (not at all)	1 to 3 times	0 times (not at all)	0 times (not at all)
2.9	4 to 6 times	4 to 6 times	4 to 6 times	0 times (not at all)	1 to 3 times	0 glasses (not at all)	3 days	1 to 3 times	0 times (not at all)	0 times (not at all)	1 to 3 times	1 to 3 times
3.7	4 to 6 times	4 to 6 times	4 to 6 times	0 times (not at all)	1 to 3 times	4 to 6 glasses	7 days (everyday)	0 times (not at all)	0 times (not at all)	0 times (not at all)	1 to 3 times	0 times (not at all)
2.9	4 to 6 times	4 to 6 times	4 to 6 times	1 to 3 times	4 to 6 times	0 glasses (not at all)	4 days	0 times (not at all)	0 times (not at all)	0 times (not at all)	0 times (not at all)	0 times (not at all)
3.2	4 to 6 times	4 to 6 times	4 to 6 times	1 to 3 times	1 to 3 times	1 to 3 glasses	7 days (everyday)	1 to 3 times	1 to 3 times	0 times (not at all)	0 times (not at all)	1 to 3 times
3.64	4 to 6 times	4 to 6 times	4 to 6 times	4 to 6 times	1 to 3 times	0 glasses (not at all)	3 days	7 to 10 times	0 times (not at all)	0 times (not at all)	0 times (not at all)	1 to 3 times
3.2	4 to 6 times	4 to 6 times	7 to 10 times	0 times (not at all)	1 to 3 times	1 to 3 glasses	5 days	0 times (not at all)	0 times (not at all)	0 times (not at all)	0 times (not at all)	1 to 3 times
3.4	4 to 6 times	4 to 6 times	7 to 10 times	1 to 3 times	7 to 10 times	0 glasses (not at all)	2 days	0 times (not at all)	0 times (not at all)	0 times (not at all)	0 times (not at all)	1 to 3 times
3.83	4 to 6 times	4 to 6 times	1 to 3 times	0 times (not at all)	0 times (not at all)	1 to 3 glasses	2 days	0 times (not at all)	0 times (not at all)	1 to 3 times	1 to 3 times	1 to 3 times
2.9	4 to 6 times	4 to 6 times	4 to 6 times	1 to 3 times	1 to 3 times	1 to 3 glasses	6 days	1 to 3 times	0 times (not at all)	0 times (not at all)	0 times (not at all)	0 times (not at all)
3.5	4 to 6 times	4 to 6 times	1 to 3 times	1 to 3 times	0 times (not at all)	0 glasses (not at all)	7 days (everyday)	0 times (not at all)	1 to 3 times	0 times (not at all)	0 times (not at all)	1 to 3 times
3.6	4 to 6 times	4 to 6 times	4 to 6 times	1 to 3 times	0 times (not at all)	0 glasses (not at all)	6 days	0 times (not at all)	0 times (not at all)	0 times (not at all)	1 to 3 times	0 times (not at all)
2.5	4 to 6 times	4 to 6 times	4 to 6 times	0 times (not at all)	1 to 3 times	0 glasses (not at all)	4 days	0 times (not at all)	0 times (not at all)	1 to 3 times	0 times (not at all)	1 to 3 times
3.75	4 to 6 times	4 to 6 times	4 to 6 times	0 times (not at all)	1 to 3 times	0 glasses (not at all)	4 days	0 times (not at all)	0 times (not at all)	1 to 3 times	0 times (not at all)	1 to 3 times
3.6	4 to 6 times	4 to 6 times	4 to 6 times	0 times (not at all)	0 times (not at all)	1 to 3 glasses	7 days (everyday)	1 to 3 times	0 times (not at all)	0 times (not at all)	0 times (not at all)	4 to 6 times
3.95	4 to 6 times	4 to 6 times	7 to 10 times	1 to 3 times	4 to 6 times	4 to 6 glasses	6 days	1 to 3 times	0 times (not at all)	0 times (not at all)	0 times (not at all)	1 to 3 times
3.75	4 to 6 times	4 to 6 times	4 to 6 times	1 to 3 times	4 to 6 times	0 glasses (not at all)	5 days	0 times (not at all)	0 times (not at all)	0 times (not at all)	7 to 10 times	1 to 3 times
3.53	4 to 6 times	4 to 6 times	1 to 3 times	4 to 6 times	1 to 3 times	1 to 3 glasses	7 days (everyday)	0 times (not at all)	0 times (not at all)	0 times (not at all)	0 times (not at all)	1 to 3 times
3.8	4 to 6 times	4 to 6 times	7 to 10 times	1 to 3 times	0 times (not at all)	1 to 3 glasses	6 days	0 times (not at all)	0 times (not at all)	0 times (not at all)	1 to 3 times	0 times (not at all)
3.78	4 to 6 times	4 to 6 times	4 to 6 times	0 times (not at all)	4 to 6 times	0 glasses (not at all)	7 days (everyday)	0 times (not at all)	0 times (not at all)	0 times (not at all)	0 times (not at all)	0 times (not at all)
3.5	4 to 6 times	4 to 6 times	4 to 6 times	1 to 3 times	0 times (not at all)	0 glasses (not at all)	6 days	0 times (not at all)	0 times (not at all)	1 to 3 times	0 times (not at all)	1 to 3 times
3.85	4 to 6 times	4 to 6 times	1 to 3 times	1 to 3 times	0 times (not at all)	0 glasses (not at all)	0 days (not at all)	1 to 3 times	0 times (not at all)	0 times (not at all)	1 to 3 times	1 to 3 times
3.45	4 to 6 times	4 to 6 times	1 to 3 times	1 to 3 times	0 times (not at all)	1 to 3 glasses	4 days	0 times (not at all)	0 times (not at all)	0 times (not at all)	4 to 6 times	1 to 3 times
3	4 to 6 times	4 to 6 times	1 to 3 times	1 to 3 times	1 to 3 times	1 to 3 glasses	7 days (everyday)	0 times (not at all)	0 times (not at all)	0 times (not at all)	4 to 6 times	0 times (not at all)
2.9	4 to 6 times	4 to 6 times	1 to 3 times	1 to 3 times	4 to 6 times	0 glasses (not at all)	4 days	4 to 6 times	0 times (not at all)	0 times (not at all)	1 to 3 times	4 to 6 times
3.6	4 to 6 times	4 to 6 times	4 to 6 times	4 to 6 times	1 to 3 times	1 to 3 glasses	7 days (everyday)	1 to 3 times	0 times (not at all)	0 times (not at all)	0 times (not at all)	1 to 3 times
3.4	4 to 6 times	4 to 6 times	0 times (not at all)	0 times (not at all)	1 to 3 times	0 glasses (not at all)	7 days (everyday)	0 times (not at all)	0 times (not at all)	0 times (not at all)	0 times (not at all)	0 times (not at all)
3.6	4 to 6 times	4 to 6 times	1 to 3 times	1 to 3 times	0 times (not at all)	0 glasses (not at all)	0 days (not at all)	1 to 3 times	0 times (not at all)	0 times (not at all)	1 to 3 times	1 to 3 times
3.56	4 to 6 times	4 to 6 times	4 to 6 times	0 times (not at all)	1 to 3 times	0 glasses (not at all)	7 days (everyday)	1 to 3 times	0 times (not at all)	1 to 3 times	0 times (not at all)	4 to 6 times
3.7	4 to 6 times	4 to 6 times	4 to 6 times	4 to 6 times	1 to 3 times	4 to 6 glasses	0 days (not at all)	0 times (not at all)	0 times (not at all)	0 times (not at all)	1 to 3 times	1 to 3 times
2.974	4 to 6 times	4 to 6 times	7 to 10 times	0 times (not at all)	0 times (not at all)	0 glasses (not at all)	7 days (everyday)	0 times (not at all)	0 times (not at all)	0 times (not at all)	0 times (not at all)	1 to 3 times
3.1	4 to 6 times	4 to 6 times	4 to 6 times	0 times (not at all)	1 to 3 times	0 glasses (not at all)	4 days	1 to 3 times	1 to 3 times	0 times (not at all)	1 to 3 times	7 to 10 times
3.8	4 to 6 times	4 to 6 times	11 times or more	1 to 3 times	4 to 6 times	1 to 3 glasses	5 days	11 times or more	4 to 6 times	1 to 3 times	0 times (not at all)	0 times (not at all)
3.33	4 to 6 times	4 to 6 times	1 to 3 times	0 times (not at all)	0 times (not at all)	0 glasses (not at all)	0 days (not at all)	1 to 3 times	0 times (not at all)	0 times (not at all)	1 to 3 times	0 times (not at all)
2.75	4 to 6 times	4 to 6 times	1 to 3 times	1 to 3 times	0 times (not at all)	0 glasses (not at all)	2 days	4 to 6 times	0 times (not at all)	0 times (not at all)	0 times (not at all)	1 to 3 times
3.01	4 to 6 times	4 to 6 times	4 to 6 times	7 to 10 times	1 to 3 times	1 to 3 glasses	2 days	0 times (not at all)	0 times (not at all)	1 to 3 times	0 times (not at all)	1 to 3 times
3.5	4 to 6 times	4 to 6 times	7 to 10 times	0 times (not at all)	1 to 3 times	1 to 3 glasses	7 days (everyday)	0 times (not at all)	0 times (not at all)	0 times (not at all)	0 times (not at all)	0 times (not at all)
3.44	4 to 6 times	4 to 6 times	4 to 6 times	1 to 3 times	0 times (not at all)	0 glasses (not at all)	4 days	7 to 10 times	0 times (not at all)	0 times (not at all)	0 times (not at all)	4 to 6 times
2.5	4 to 6 times	4 to 6 times	1 to 3 times	1 to 3 times	0 times (not at all)	0 glasses (not at all)	7 days (everyday)	1 to 3 times	0 times (not at all)	0 times (not at all)	0 times (not at all)	0 times (not at all)
3.1	4 to 6 times	4 to 6 times	1 to 3 times	0 times (not at all)	0 times (not at all)	0 glasses (not at all)	7 days (everyday)	0 times (not at all)	0 times (not at all)	0 times (not at all)	1 to 3 times	1 to 3 times
3.26	4 to 6 times	4 to 6 times	1 to 3 times	0 times (not at all)	1 to 3 times	0 glasses (not at all)	6 days	0 times (not at all)	0 times (not at all)	0 times (not at all)	0 times (not at all)	4 to 6 times
3.5	4 to 6 times	4 to 6 times	4 to 6 times	1 to 3 times	1 to 3 times	1 to 3 glasses	7 days (everyday)	0 times (not at all)	0 times (not at all)	0 times (not at all)	0 times (not at all)	1 to 3 times
3.7	4 to 6 times	4 to 6 times	4 to 6 times	4 to 6 times	0 times (not at all)	0 glasses (not at all)	5 days	1 to 3 times	0 times (not at all)	0 times (not at all)	0 times (not at all)	0 times (not at all)
3.94	4 to 6 times	4 to 6 times	1 to 3 times	0 times (not at all)	0 times (not at all)	0 glasses (not at all)	5 days	1 to 3 times	0 times (not at all)	0 times (not at all)	7 to 10 times	1 to 3 times
3.4	4 to 6 times	4 to 6 times	4 to 6 times	1 to 3 times	4 to 6 times	0 glasses (not at all)	7 days (everyday)	1 to 3 times	0 times (not at all)	0 times (not at all)	1 to 3 times	1 to 3 times
3.49	4 to 6 times	4 to 6 times	4 to 6 times	1 to 3 times	4 to 6 times	0 glasses (not at all)	7 days (everyday)	1 to 3 times	0 times (not at all)	0 times (not at all)	1 to 3 times	1 to 3 times
3.11	4 to 6 times	4 to 6 times	4 to 6 times	0 times (not at all)	4 to 6 times	4 to 6 glasses	7 days (everyday)	0 times (not at all)	0 times (not at all)	0 times (not at all)	0 times (not at all)	1 to 3 times
3.2	4 to 6 times	4 to 6 times	1 to 3 times	0 times (not at all)	1 to 3 times	0 glasses (not at all)	2 days	1 to 3 times	0 times (not at all)	0 times (not at all)	0 times (not at all)	1 to 3 times
3.5	4 to 6 times	4 to 6 times	0 times (not at all)	1 to 3 times	0 times (not at all)	1 to 3 glasses	4 days	4 to 6 times	0 times (not at all)	0 times (not at all)	1 to 3 times	1 to 3 times
3.61	4 to 6 times	4 to 6 times	1 to 3 times	0 times (not at all)	0 times (not at all)	0 glasses (not at all)	4 days	4 to 6 times	1 to 3 times	0 times (not at all)	1 to 3 times	1 to 3 times
3.7	4 to 6 times	4 to 6 times	1 to 3 times	0 times (not at all)	1 to 3 times	4 to 6 glasses	3 days	11 times or more	0 times (not at all)	0 times (not at all)	0 times (not at all)	1 to 3 times
3.5	4 to 6 times	4 to 6 times	4 to 6 times	1 to 3 times	4 to 6 times	0 glasses (not at all)	5 days	0 times (not at all)	0 times (not at all)	0 times (not at all)	0 times (not at all)	1 to 3 times
3.6	4 to 6 times	4 to 6 times	1 to 3 times	0 times (not at all)	1 to 3 times	0 glasses (not at all)	1 day	0 times (not at all)	1 to 3 times	0 times (not at all)	0 times (not at all)	1 to 3 times
3.95	4 to 6 times	4 to 6 times	4 to 6 times	4 to 6 times	1 to 3 times	1 to 3 glasses	3 days	1 to 3 times	1 to 3 times	0 times (not at all)	1 to 3 times	1 to 3 times
3.8	4 to 6 times	4 to 6 times	1 to 3 times	0 times (not at all)	1 to 3 times	0 glasses (not at all)	2 days	4 to 6 times	0 times (not at all)	0 times (not at all)	0 times (not at all)	1 to 3 times
3.86	4 to 6 times	4 to 6 times	1 to 3 times	0 times (not at all)	4 to 6 times	1 to 3 glasses	6 days	0 times (not at all)	0 times (not at all)	0 times (not at all)	1 to 3 times	0 times (not at all)
3.5	4 to 6 times	4 to 6 times	0 times (not at all)	1 to 3 times	0 times (not at all)	1 to 3 glasses	1 day	7 to 10 times	0 times (not at all)	0 times (not at all)	0 times (not at all)	4 to 6 times
3.7	4 to 6 times	4 to 6 times	4 to 6 times	1 to 3 times	1 to 3 times	4 to 6 glasses	7 days (everyday)	0 times (not at all)	0 times (not at all)	0 times (not at all)	1 to 3 times	0 times (not at all)
3.4	4 to 6 times	4 to 6 times	1 to 3 times	0 times (not at all)	0 times (not at all)	1 to 3 glasses	7 days (everyday)	0 times (not at all)	0 times (not at all)	0 times (not at all)	0 times (not at all)	1 to 3 times
4.71	4 to 6 times	4 to 6 times	1 to 3 times	0 times (not at all)	4 to 6 times	0 glasses (not at all)	6 days	1 to 3 times	0 times (not at all)	0 times (not at all)	0 times (not at all)	1 to 3 times
3.94	4 to 6 times	4 to 6 times	1 to 3 times	0 times (not at all)	4 to 6 times	0 glasses (not at all)	7 days (everyday)	0 times (not at all)	0 times (not at all)	1 to 3 times	0 times (not at all)	1 to 3 times
3.34	4 to 6 times	4 to 6 times	0 times (not at all)	0 times (not at all)	1 to 3 times	0 glasses (not at all)	7 days (everyday)	1 to 3 times	0 times (not at all)	0 times (not at all)	0 times (not at all)	1 to 3 times
2.7	4 to 6 times	4 to 6 times	1 to 3 times	1 to 3 times	4 to 6 times	0 glasses (not at all)	3 days	4 to 6 times	1 to 3 times	0 times (not at all)	1 to 3 times	4 to 6 times
2.9	4 to 6 times	4 to 6 times	4 to 6 times	0 times (not at all)	4 to 6 times	1 to 3 glasses	0 days (not at all)	0 times (not at all)	0 times (not at all)	0 times (not at all)	0 times (not at all)	1 to 3 times
3.67	4 to 6 times	4 to 6 times	1 to 3 times	0 times (not at all)	1 to 3 times	0 glasses (not at all)	3 days	0 times (not at all)	0 times (not at all)	0 times (not at all)	0 times (not at all)	0 times (not at all)
3.7	4 to 6 times	4 to 6 times	7 to 10 times	1 to 3 times	1 to 3 times	0 glasses (not at all)	7 days (everyday)	1 to 3 times	0 times (not at all)	0 times (not at all)	0 times (not at all)	1 to 3 times
3.6	4 to 6 times	4 to 6 times	4 to 6 times	4 to 6 times	0 times (not at all)	4 to 6 glasses	7 days (everyday)	4 to 6 times	0 times (not at all)	0 times (not at all)	0 times (not at all)	4 to 6 times
3.5	4 to 6 times	4 to 6 times	1 to 3 times	0 times (not at all)	1 to 3 times	0 glasses (not at all)	2 days	1 to 3 times	0 times (not at all)	0 times (not at all)	0 times (not at all)	1 to 3 times
3.6	4 to 6 times	4 to 6 times	4 to 6 times	1 to 3 times	4 to 6 times	1 to 3 glasses	6 days	0 times (not at all)	0 times (not at all)	0 times (not at all)	0 times (not at all)	1 to 3 times
4	4 to 6 times	4 to 6 times	1 to 3 times	0 times (not at all)	0 times (not at all)	0 glasses (not at all)	1 day	4 to 6 times	0 times (not at all)	0 times (not at all)	1 to 3 times	1 to 3 times
3.6	4 to 6 times	4 to 6 times	1 to 3 times	1 to 3 times	1 to 3 times	0 glasses (not at all)	2 days	0 times (not at all)	0 times (not at all)	0 times (not at all)	0 times (not at all)	1 to 3 times
4	4 to 6 times	4 to 6 times	4 to 6 times	1 to 3 times	1 to 3 times	0 glasses (not at all)	6 days	0 times (not at all)	0 times (not at all)	0 times (not at all)	0 times (not at all)	1 to 3 times
3.4	4 to 6 times	4 to 6 times	1 to 3 times	4 to 6 times	0 times (not at all)	0 glasses (not at all)	5 days	0 times (not at all)	0 times (not at all)	0 times (not at all)	0 times (not at all)	1 to 3 times
3.9	4 to 6 times	4 to 6 times	4 to 6 times	1 to 3 times	1 to 3 times	0 glasses (not at all)	7 days (everyday)	1 to 3 times	0 times (not at all)	0 times (not at all)	4 to 6 times	1 to 3 times
3.25	4 to 6 times	4 to 6 times	4 to 6 times	4 to 6 times	1 to 3 times	0 glasses (not at all)	7 days (everyday)	0 times (not at all)	0 times (not at all)	0 times (not at all)	0 times (not at all)	1 to 3 times
2.52	4 to 6 times	4 to 6 times	1 to 3 times	1 to 3 times	1 to 3 times	0 glasses (not at all)	7 days (everyday)	7 to 10 times	0 times (not at all)	0 times (not at all)	0 times (not at all)	1 to 3 times
3.2	4 to 6 times	4 to 6 times	4 to 6 times	1 to 3 times	1 to 3 times	0 glasses (not at all)	5 days	1 to 3 times	0 times (not at all)	0 times (not at all)	0 times (not at all)	1 to 3 times
3.78	4 to 6 times	4 to 6 times	1 to 3 times	0 times (not at all)	1 to 3 times	0 glasses (not at all)	1 day	0 times (not at all)	0 times (not at all)	0 times (not at all)	0 times (not at all)	1 to 3 times
3.31	4 to 6 times	4 to 6 times	1 to 3 times	1 to 3 times	4 to 6 times	0 glasses (not at all)	0 days (not at all)	0 times (not at all)	0 times (not at all)	0 times (not at all)	0 times (not at all)	1 to 3 times
4	4 to 6 times	4 to 6 times	11 times or more	0 times (not at all)	4 to 6 times	0 glasses (not at all)	7 days (everyday)	0 times (not at all)	11 times or more	0 times (not at all)	0 times (not at all)	1 to 3 times
3	4 to 6 times	4 to 6 times	1 to 3 times	0 times (not at all)	4 to 6 times	0 glasses (not at all)	2 days	0 times (not at all)	1 to 3 times	0 times (not at all)	0 times (not at all)	1 to 3 times
3.55	4 to 6 times	4 to 6 times	1 to 3 times	0 times (not at all)	1 to 3 times	0 glasses (not at all)	7 days (everyday)	0 times (not at all)	0 times (not at all)	0 times (not at all)	0 times (not at all)	0 times (not at all)
3.5	4 to 6 times	4 to 6 times	7 to 10 times	11 times or more	0 times (not at all)	7 to 10 glasses	7 days (everyday)	4 to 6 times	0 times (not at all)	0 times (not at all)	1 to 3 times	4 to 6 times
3.85	4 to 6 times	4 to 6 times	1 to 3 times	1 to 3 times	1 to 3 times	0 glasses (not at all)	7 days (everyday)	0 times (not at all)	0 times (not at all)	0 times (not at all)	0 times (not at all)	1 to 3 times
3.6	4 to 6 times	4 to 6 times	7 to 10 times	0 times (not at all)	1 to 3 times	0 glasses (not at all)	7 days (everyday)	0 times (not at all)	0 times (not at all)	0 times (not at all)	0 times (not at all)	1 to 3 times
2.78	4 to 6 times	4 to 6 times	1 to 3 times	1 to 3 times	0 times (not at all)	0 glasses (not at all)	1 day	11 times or more	11 times or more	0 times (not at all)	0 times (not at all)	4 to 6 times
3.2	4 to 6 times	4 to 6 times	1 to 3 times	0 times (not at all)	0 times (not at all)	0 glasses (not at all)	2 days	1 to 3 times	0 times (not at all)	0 times (not at all)	1 to 3 times	1 to 3 times
4	4 to 6 times	4 to 6 times	4 to 6 times	4 to 6 times	4 to 6 times	0 glasses (not at all)	7 days (everyday)	0 times (not at all)	0 times (not at all)	0 times (not at all)	0 times (not at all)	0 times (not at all)
3.11	4 to 6 times	4 to 6 times	0 times (not at all)	0 times (not at all)	1 to 3 times	0 glasses (not at all)	5 days	1 to 3 times	0 times (not at all)	7 to 10 times	0 times (not at all)	1 to 3 times
3.24	4 to 6 times	4 to 6 times	1 to 3 times	4 to 6 times	0 times (not at all)	4 to 6 glasses	6 days	0 times (not at all)	4 to 6 times	0 times (not at all)	0 times (not at all)	1 to 3 times
3.4	4 to 6 times	4 to 6 times	0 times (not at all)	0 times (not at all)	1 to 3 times	0 glasses (not at all)	0 days (not at all)	0 times (not at all)	0 times (not at all)	1 to 3 times	0 times (not at all)	1 to 3 times
3.7	4 to 6 times	4 to 6 times	1 to 3 times	7 to 10 times	1 to 3 times	0 glasses (not at all)	5 days	1 to 3 times	0 times (not at all)	0 times (not at all)	1 to 3 times	4 to 6 times
3.6	4 to 6 times	4 to 6 times	4 to 6 times	4 to 6 times	0 times (not at all)	0 glasses (not at all)	3 days	1 to 3 times	0 times (not at all)	0 times (not at all)	0 times (not at all)	0 times (not at all)
3.9	4 to 6 times	4 to 6 times	0 times (not at all)	0 times (not at all)	4 to 6 times	0 glasses (not at all)	6 days	0 times (not at all)	0 times (not at all)	0 times (not at all)	0 times (not at all)	0 times (not at all)
4	4 to 6 times	4 to 6 times	7 to 10 times	1 to 3 times	0 times (not at all)	4 to 6 glasses	2 days	4 to 6 times	0 times (not at all)	1 to 3 times	0 times (not at all)	1 to 3 times
3.56	4 to 6 times	4 to 6 times	1 to 3 times	0 times (not at all)	0 times (not at all)	1 to 3 glasses	7 days (everyday)	0 times (not at all)	0 times (not at all)	0 times (not at all)	0 times (not at all)	1 to 3 times
3.2	4 to 6 times	4 to 6 times	4 to 6 times	1 to 3 times	1 to 3 times	0 glasses (not at all)	3 days	1 to 3 times	0 times (not at all)	0 times (not at all)	0 times (not at all)	1 to 3 times
2.48	4 to 6 times	4 to 6 times	0 times (not at all)	0 times (not at all)	4 to 6 times	0 glasses (not at all)	6 days	0 times (not at all)	4 to 6 times	7 to 10 times	7 to 10 times	1 to 3 times
2.9	4 to 6 times	4 to 6 times	7 to 10 times	0 times (not at all)	0 times (not at all)	0 glasses (not at all)	3 days	0 times (not at all)	1 to 3 times	0 times (not at all)	1 to 3 times	1 to 3 times
2.9	4 to 6 times	4 to 6 times	4 to 6 times	1 to 3 times	0 times (not at all)	4 to 6 glasses	1 day	4 to 6 times	0 times (not at all)	0 times (not at all)	0 times (not at all)	1 to 3 times
3.91	4 to 6 times	4 to 6 times	0 times (not at all)	0 times (not at all)	1 to 3 times	1 to 3 glasses	7 days (everyday)	0 times (not at all)	0 times (not at all)	0 times (not at all)	0 times (not at all)	1 to 3 times
2.7	4 to 6 times	4 to 6 times	4 to 6 times	0 times (not at all)	4 to 6 times	0 glasses (not at all)	0 days (not at all)	0 times (not at all)	4 to 6 times	0 times (not at all)	0 times (not at all)	0 times (not at all)
3.75	4 to 6 times	4 to 6 times	4 to 6 times	0 times (not at all)	1 to 3 times	0 glasses (not at all)	4 days	0 times (not at all)	0 times (not at all)	0 times (not at all)	0 times (not at all)	1 to 3 times
1.9	4 to 6 times	4 to 6 times	1 to 3 times	4 to 6 times	0 times (not at all)	0 glasses (not at all)	0 days (not at all)	1 to 3 times	4 to 6 times	0 times (not at all)	0 times (not at all)	7 to 10 times
3	4 to 6 times	4 to 6 times	4 to 6 times	1 to 3 times	1 to 3 times	1 to 3 glasses	2 days	4 to 6 times	1 to 3 times	0 times (not at all)	1 to 3 times	0 times (not at all)
4	4 to 6 times	4 to 6 times	4 to 6 times	0 times (not at all)	0 times (not at all)	1 to 3 glasses	3 days	0 times (not at all)	0 times (not at all)	0 times (not at all)	0 times (not at all)	1 to 3 times
3.4	4 to 6 times	4 to 6 times	4 to 6 times	1 to 3 times	1 to 3 times	0 glasses (not at all)	3 days	1 to 3 times	0 times (not at all)	0 times (not at all)	0 times (not at all)	1 to 3 times
2.05	4 to 6 times	4 to 6 times	1 to 3 times	1 to 3 times	0 times (not at all)	4 to 6 glasses	7 days (everyday)	0 times (not at all)	0 times (not at all)	0 times (not at all)	1 to 3 times	4 to 6 times
3.235	4 to 6 times	4 to 6 times	4 to 6 times	7 to 10 times	1 to 3 times	0 glasses (not at all)	1 day	4 to 6 times	4 to 6 times	1 to 3 times	4 to 6 times	1 to 3 times
3.6	4 to 6 times	4 to 6 times	4 to 6 times	7 to 10 times	1 to 3 times	0 glasses (not at all)	1 day	4 to 6 times	4 to 6 times	1 to 3 times	4 to 6 times	1 to 3 times
3.47	4 to 6 times	4 to 6 times	4 to 6 times	4 to 6 times	0 times (not at all)	4 to 6 glasses	7 days (everyday)	4 to 6 times	0 times (not at all)	0 times (not at all)	0 times (not at all)	4 to 6 times
0.94	4 to 6 times	4 to 6 times	4 to 6 times	1 to 3 times	1 to 3 times	0 glasses (not at all)	4 days	11 times or more	0 times (not at all)	0 times (not at all)	4 to 6 times	1 to 3 times
3.1	4 to 6 times	4 to 6 times	1 to 3 times	1 to 3 times	1 to 3 times	4 to 6 glasses	4 days	4 to 6 times	0 times (not at all)	0 times (not at all)	0 times (not at all)	1 to 3 times
3	4 to 6 times	4 to 6 times	1 to 3 times	0 times (not at all)	4 to 6 times	0 glasses (not at all)	0 days (not at all)	0 times (not at all)	0 times (not at all)	0 times (not at all)	11 times or more	0 times (not at all)
3.4	4 to 6 times	4 to 6 times	4 to 6 times	1 to 3 times	1 to 3 times	0 glasses (not at all)	2 days	0 times (not at all)	0 times (not at all)	0 times (not at all)	4 to 6 times	1 to 3 times
3	4 to 6 times	4 to 6 times	1 to 3 times	1 to 3 times	0 times (not at all)	0 glasses (not at all)	2 days	1 to 3 times	1 to 3 times	0 times (not at all)	1 to 3 times	1 to 3 times
3.4	4 to 6 times	4 to 6 times	4 to 6 times	0 times (not at all)	4 to 6 times	0 glasses (not at all)	7 days (everyday)	0 times (not at all)	0 times (not at all)	0 times (not at all)	0 times (not at all)	0 times (not at all)
3.9	4 to 6 times	4 to 6 times	1 to 3 times	1 to 3 times	0 times (not at all)	1 to 3 glasses	4 days	0 times (not at all)	0 times (not at all)	0 times (not at all)	1 to 3 times	1 to 3 times
3.5	4 to 6 times	4 to 6 times	1 to 3 times	1 to 3 times	0 times (not at all)	1 to 3 glasses	1 day	1 to 3 times	0 times (not at all)	0 times (not at all)	4 to 6 times	1 to 3 times
2.8	4 to 6 times	4 to 6 times	11 times or more	0 times (not at all)	0 times (not at all)	0 glasses (not at all)	3 days	0 times (not at all)	0 times (not at all)	0 times (not at all)	0 times (not at all)	1 to 3 times
3.65	4 to 6 times	4 to 6 times	1 to 3 times	1 to 3 times	1 to 3 times	1 to 3 glasses	2 days	4 to 6 times	0 times (not at all)	0 times (not at all)	1 to 3 times	4 to 6 times
3.4	4 to 6 times	4 to 6 times	0 times (not at all)	0 times (not at all)	0 times (not at all)	4 to 6 glasses	3 days	1 to 3 times	0 times (not at all)	0 times (not at all)	7 to 10 times	1 to 3 times
3.72	4 to 6 times	4 to 6 times	7 to 10 times	0 times (not at all)	1 to 3 times	4 to 6 glasses	7 days (everyday)	0 times (not at all)	0 times (not at all)	0 times (not at all)	11 times or more	1 to 3 times
3.3	4 to 6 times	4 to 6 times	4 to 6 times	1 to 3 times	4 to 6 times	0 glasses (not at all)	7 days (everyday)	1 to 3 times	0 times (not at all)	0 times (not at all)	0 times (not at all)	1 to 3 times
2.9	4 to 6 times	4 to 6 times	4 to 6 times	1 to 3 times	1 to 3 times	4 to 6 glasses	7 days (everyday)	0 times (not at all)	0 times (not at all)	0 times (not at all)	1 to 3 times	0 times (not at all)
3.12	4 to 6 times	4 to 6 times	0 times (not at all)	0 times (not at all)	4 to 6 times	0 glasses (not at all)	6 days	0 times (not at all)	4 to 6 times	7 to 10 times	7 to 10 times	1 to 3 times
3.6	4 to 6 times	4 to 6 times	1 to 3 times	4 to 6 times	1 to 3 times	0 glasses (not at all)	2 days	0 times (not at all)	0 times (not at all)	0 times (not at all)	1 to 3 times	1 to 3 times
3.26	4 to 6 times	4 to 6 times	7 to 10 times	0 times (not at all)	1 to 3 times	1 to 3 glasses	0 days (not at all)	0 times (not at all)	0 times (not at all)	0 times (not at all)	0 times (not at all)	1 to 3 times
3.46	4 to 6 times	4 to 6 times	4 to 6 times	0 times (not at all)	0 times (not at all)	0 glasses (not at all)	4 days	1 to 3 times	1 to 3 times	0 times (not at all)	0 times (not at all)	1 to 3 times
2.9	4 to 6 times	4 to 6 times	4 to 6 times	0 times (not at all)	1 to 3 times	0 glasses (not at all)	1 day	0 times (not at all)	0 times (not at all)	0 times (not at all)	0 times (not at all)	4 to 6 times
3.8	4 to 6 times	4 to 6 times	7 to 10 times	7 to 10 times	1 to 3 times	4 to 6 glasses	4 days	1 to 3 times	0 times (not at all)	0 times (not at all)	11 times or more	1 to 3 times
3.24	4 to 6 times	4 to 6 times	1 to 3 times	4 to 6 times	1 to 3 times	0 glasses (not at all)	2 days	4 to 6 times	0 times (not at all)	0 times (not at all)	0 times (not at all)	4 to 6 times
3.72	4 to 6 times	4 to 6 times	1 to 3 times	1 to 3 times	0 times (not at all)	0 glasses (not at all)	7 days (everyday)	1 to 3 times	0 times (not at all)	1 to 3 times	0 times (not at all)	4 to 6 times
3.54	4 to 6 times	4 to 6 times	1 to 3 times	1 to 3 times	4 to 6 times	4 to 6 glasses	7 days (everyday)	0 times (not at all)	0 times (not at all)	0 times (not at all)	7 to 10 times	1 to 3 times
3.1	4 to 6 times	4 to 6 times	1 to 3 times	1 to 3 times	1 to 3 times	4 to 6 glasses	1 day	11 times or more	0 times (not at all)	0 times (not at all)	0 times (not at all)	0 times (not at all)
3.7	4 to 6 times	4 to 6 times	1 to 3 times	0 times (not at all)	1 to 3 times	1 to 3 glasses	7 days (everyday)	4 to 6 times	0 times (not at all)	0 times (not at all)	0 times (not at all)	1 to 3 times
3.82	4 to 6 times	4 to 6 times	1 to 3 times	0 times (not at all)	0 times (not at all)	0 glasses (not at all)	7 days (everyday)	0 times (not at all)	0 times (not at all)	0 times (not at all)	0 times (not at all)	1 to 3 times
2.4	4 to 6 times	4 to 6 times	1 to 3 times	1 to 3 times	1 to 3 times	1 to 3 glasses	2 days	1 to 3 times	1 to 3 times	0 times (not at all)	1 to 3 times	11 times or more
2.91	4 to 6 times	4 to 6 times	4 to 6 times	4 to 6 times	1 to 3 times	0 glasses (not at all)	6 days	0 times (not at all)	0 times (not at all)	0 times (not at all)	1 to 3 times	1 to 3 times
3.67	4 to 6 times	4 to 6 times	1 to 3 times	0 times (not at all)	0 times (not at all)	1 to 3 glasses	7 days (everyday)	0 times (not at all)	0 times (not at all)	0 times (not at all)	0 times (not at all)	1 to 3 times
2.54	4 to 6 times	4 to 6 times	4 to 6 times	0 times (not at all)	1 to 3 times	0 glasses (not at all)	0 days (not at all)	4 to 6 times	0 times (not at all)	0 times (not at all)	4 to 6 times	4 to 6 times
3.4	4 to 6 times	4 to 6 times	4 to 6 times	0 times (not at all)	0 times (not at all)	1 to 3 glasses	7 days (everyday)	0 times (not at all)	0 times (not at all)	0 times (not at all)	0 times (not at all)	0 times (not at all)
3.5	4 to 6 times	4 to 6 times	1 to 3 times	0 times (not at all)	1 to 3 times	4 to 6 glasses	7 days (everyday)	1 to 3 times	0 times (not at all)	0 times (not at all)	11 times or more	1 to 3 times
2.8	4 to 6 times	4 to 6 times	1 to 3 times	1 to 3 times	1 to 3 times	0 glasses (not at all)	3 days	7 to 10 times	0 times (not at all)	0 times (not at all)	0 times (not at all)	1 to 3 times
2.8	4 to 6 times	4 to 6 times	7 to 10 times	0 times (not at all)	0 times (not at all)	4 to 6 glasses	0 days (not at all)	0 times (not at all)	7 to 10 times	1 to 3 times	1 to 3 times	11 times or more
3.09	4 to 6 times	4 to 6 times	4 to 6 times	1 to 3 times	4 to 6 times	7 to 10 glasses	7 days (everyday)	1 to 3 times	0 times (not at all)	0 times (not at all)	0 times (not at all)	1 to 3 times
2.5	4 to 6 times	4 to 6 times	4 to 6 times	1 to 3 times	0 times (not at all)	4 to 6 glasses	3 days	1 to 3 times	0 times (not at all)	0 times (not at all)	1 to 3 times	1 to 3 times
2.79	4 to 6 times	4 to 6 times	4 to 6 times	4 to 6 times	0 times (not at all)	0 glasses (not at all)	0 days (not at all)	7 to 10 times	0 times (not at all)	0 times (not at all)	7 to 10 times	4 to 6 times
3	4 to 6 times	4 to 6 times	4 to 6 times	0 times (not at all)	0 times (not at all)	1 to 3 glasses	3 days	0 times (not at all)	0 times (not at all)	0 times (not at all)	0 times (not at all)	1 to 3 times
3.5	4 to 6 times	4 to 6 times	1 to 3 times	1 to 3 times	0 times (not at all)	0 glasses (not at all)	1 day	0 times (not at all)	0 times (not at all)	0 times (not at all)	1 to 3 times	1 to 3 times
2.89	4 to 6 times	4 to 6 times	4 to 6 times	1 to 3 times	1 to 3 times	0 glasses (not at all)	3 days	1 to 3 times	0 times (not at all)	0 times (not at all)	0 times (not at all)	1 to 3 times
3.5	7 to 10 times	7 to 10 times	7 to 10 times	0 times (not at all)	7 to 10 times	0 glasses (not at all)	0 days (not at all)	0 times (not at all)	0 times (not at all)	0 times (not at all)	0 times (not at all)	0 times (not at all)
4	7 to 10 times	7 to 10 times	7 to 10 times	0 times (not at all)	4 to 6 times	1 to 3 glasses	7 days (everyday)	0 times (not at all)	1 to 3 times	1 to 3 times	1 to 3 times	1 to 3 times
4	7 to 10 times	7 to 10 times	1 to 3 times	1 to 3 times	1 to 3 times	0 glasses (not at all)	3 days	0 times (not at all)	0 times (not at all)	0 times (not at all)	0 times (not at all)	0 times (not at all)
3.81	7 to 10 times	7 to 10 times	4 to 6 times	1 to 3 times	1 to 3 times	7 to 10 glasses	7 days (everyday)	0 times (not at all)	0 times (not at all)	0 times (not at all)	0 times (not at all)	0 times (not at all)
3.07	7 to 10 times	7 to 10 times	4 to 6 times	1 to 3 times	1 to 3 times	0 glasses (not at all)	4 days	0 times (not at all)	0 times (not at all)	0 times (not at all)	0 times (not at all)	1 to 3 times
3.1	7 to 10 times	7 to 10 times	4 to 6 times	0 times (not at all)	1 to 3 times	0 glasses (not at all)	4 days	0 times (not at all)	0 times (not at all)	0 times (not at all)	1 to 3 times	1 to 3 times
4	7 to 10 times	7 to 10 times	7 to 10 times	7 to 10 times	4 to 6 times	0 glasses (not at all)	7 days (everyday)	0 times (not at all)	0 times (not at all)	0 times (not at all)	0 times (not at all)	0 times (not at all)
2.76	7 to 10 times	7 to 10 times	4 to 6 times	0 times (not at all)	0 times (not at all)	1 to 3 glasses	7 days (everyday)	0 times (not at all)	0 times (not at all)	4 to 6 times	0 times (not at all)	1 to 3 times
2.9	7 to 10 times	7 to 10 times	4 to 6 times	1 to 3 times	1 to 3 times	7 to 10 glasses	7 days (everyday)	0 times (not at all)	0 times (not at all)	0 times (not at all)	0 times (not at all)	0 times (not at all)
3.2	7 to 10 times	7 to 10 times	1 to 3 times	4 to 6 times	0 times (not at all)	0 glasses (not at all)	7 days (everyday)	11 times or more	0 times (not at all)	0 times (not at all)	0 times (not at all)	0 times (not at all)
4	7 to 10 times	7 to 10 times	1 to 3 times	1 to 3 times	1 to 3 times	4 to 6 glasses	4 days	1 to 3 times	0 times (not at all)	0 times (not at all)	0 times (not at all)	0 times (not at all)
3.76	7 to 10 times	7 to 10 times	11 times or more	1 to 3 times	0 times (not at all)	11 glasses or more	7 days (everyday)	0 times (not at all)	0 times (not at all)	0 times (not at all)	1 to 3 times	1 to 3 times
3.63	7 to 10 times	7 to 10 times	1 to 3 times	0 times (not at all)	4 to 6 times	0 glasses (not at all)	5 days	1 to 3 times	0 times (not at all)	0 times (not at all)	1 to 3 times	1 to 3 times
3.23	7 to 10 times	7 to 10 times	4 to 6 times	1 to 3 times	1 to 3 times	7 to 10 glasses	7 days (everyday)	0 times (not at all)	0 times (not at all)	0 times (not at all)	0 times (not at all)	0 times (not at all)
3.75	7 to 11 times	7 to 10 times	1 to 3 times	0 times (not at all)	1 to 3 times	0 glasses (not at all)	3 days	0 times (not at all)	0 times (not at all)	0 times (not at all)	0 times (not at all)	1 to 3 times
3.3	7 to 11 times	7 to 10 times	4 to 6 times	0 times (not at all)	7 to 10 times	1 to 3 glasses	4 days	0 times (not at all)	0 times (not at all)	0 times (not at all)	0 times (not at all)	0 times (not at all)
3.69	7 to 11 times	7 to 10 times	4 to 6 times	1 to 3 times	4 to 6 times	7 to 10 glasses	5 days	1 to 3 times	0 times (not at all)	0 times (not at all)	0 times (not at all)	1 to 3 times
3.91	7 to 11 times	7 to 10 times	11 times or more	1 to 3 times	11 times or more	0 glasses (not at all)	7 days (everyday)	0 times (not at all)	0 times (not at all)	0 times (not at all)	0 times (not at all)	0 times (not at all)
3.45	7 to 11 times	7 to 10 times	1 to 3 times	0 times (not at all)	1 to 3 times	0 glasses (not at all)	1 day	0 times (not at all)	0 times (not at all)	0 times (not at all)	1 to 3 times	4 to 6 times
4	7 to 11 times	7 to 10 times	1 to 3 times	0 times (not at all)	1 to 3 times	4 to 6 glasses	5 days	0 times (not at all)	0 times (not at all)	0 times (not at all)	1 to 3 times	0 times (not at all)
3.75	7 to 11 times	7 to 10 times	7 to 10 times	0 times (not at all)	4 to 6 times	1 to 3 glasses	7 days (everyday)	0 times (not at all)	0 times (not at all)	0 times (not at all)	0 times (not at all)	0 times (not at all)
4	7 to 11 times	7 to 10 times	4 to 6 times	0 times (not at all)	4 to 6 times	0 glasses (not at all)	7 days (everyday)	1 to 3 times	0 times (not at all)	0 times (not at all)	0 times (not at all)	1 to 3 times
2.6	7 to 11 times	7 to 10 times	1 to 3 times	4 to 6 times	7 to 10 times	0 glasses (not at all)	7 days (everyday)	0 times (not at all)	0 times (not at all)	0 times (not at all)	0 times (not at all)	0 times (not at all)
3.9	7 to 11 times	7 to 10 times	7 to 10 times	0 times (not at all)	7 to 10 times	1 to 3 glasses	7 days (everyday)	0 times (not at all)	0 times (not at all)	0 times (not at all)	0 times (not at all)	0 times (not at all)
3.8	7 to 11 times	7 to 10 times	0 times (not at all)	1 to 3 times	4 to 6 times	4 to 6 glasses	2 days	7 to 10 times	0 times (not at all)	0 times (not at all)	0 times (not at all)	1 to 3 times
3.7	7 to 11 times	7 to 10 times	1 to 3 times	0 times (not at all)	4 to 6 times	1 to 3 glasses	7 days (everyday)	0 times (not at all)	0 times (not at all)	0 times (not at all)	0 times (not at all)	1 to 3 times
4	7 to 11 times	7 to 10 times	7 to 10 times	4 to 6 times	1 to 3 times	1 to 3 glasses	3 days	1 to 3 times	0 times (not at all)	0 times (not at all)	0 times (not at all)	1 to 3 times
3.5	7 to 11 times	7 to 10 times	1 to 3 times	0 times (not at all)	1 to 3 times	1 to 3 glasses	5 days	1 to 3 times	0 times (not at all)	0 times (not at all)	0 times (not at all)	1 to 3 times
3.45	7 to 11 times	7 to 10 times	7 to 10 times	0 times (not at all)	4 to 6 times	0 glasses (not at all)	1 day	0 times (not at all)	0 times (not at all)	0 times (not at all)	0 times (not at all)	1 to 3 times
3.2	7 to 11 times	7 to 10 times	1 to 3 times	0 times (not at all)	1 to 3 times	0 glasses (not at all)	7 days (everyday)	0 times (not at all)	0 times (not at all)	0 times (not at all)	4 to 6 times	1 to 3 times
3.6	7 to 11 times	7 to 10 times	7 to 10 times	1 to 3 times	0 times (not at all)	0 glasses (not at all)	0 days (not at all)	0 times (not at all)	0 times (not at all)	0 times (not at all)	0 times (not at all)	0 times (not at all)
4	7 to 11 times	7 to 10 times	1 to 3 times	0 times (not at all)	0 times (not at all)	0 glasses (not at all)	4 days	1 to 3 times	1 to 3 times	0 times (not at all)	1 to 3 times	1 to 3 times
3.55	7 to 11 times	7 to 10 times	4 to 6 times	4 to 6 times	0 times (not at all)	1 to 3 glasses	2 days	1 to 3 times	1 to 3 times	0 times (not at all)	0 times (not at all)	1 to 3 times
3.34	7 to 11 times	7 to 10 times	4 to 6 times	7 to 10 times	0 times (not at all)	0 glasses (not at all)	5 days	4 to 6 times	0 times (not at all)	0 times (not at all)	0 times (not at all)	1 to 3 times
2.5	7 to 11 times	7 to 10 times	4 to 6 times	4 to 6 times	4 to 6 times	1 to 3 glasses	4 days	4 to 6 times	1 to 3 times	0 times (not at all)	0 times (not at all)	0 times (not at all)
3.31	7 to 11 times	7 to 10 times	4 to 6 times	4 to 6 times	4 to 6 times	1 to 3 glasses	4 days	4 to 6 times	1 to 3 times	0 times (not at all)	0 times (not at all)	0 times (not at all)
1.9	7 to 11 times	7 to 10 times	11 times or more	11 times or more	0 times (not at all)	1 to 3 glasses	1 day	0 times (not at all)	1 to 3 times	0 times (not at all)	0 times (not at all)	1 to 3 times
3.36	7 to 11 times	7 to 10 times	4 to 6 times	0 times (not at all)	0 times (not at all)	1 to 3 glasses	6 days	0 times (not at all)	0 times (not at all)	0 times (not at all)	0 times (not at all)	0 times (not at all)
2.9	7 to 11 times	7 to 10 times	7 to 10 times	0 times (not at all)	4 to 6 times	0 glasses (not at all)	5 days	1 to 3 times	0 times (not at all)	0 times (not at all)	0 times (not at all)	1 to 3 times
3.5	7 to 11 times	7 to 10 times	1 to 3 times	0 times (not at all)	4 to 6 times	0 glasses (not at all)	4 days	1 to 3 times	0 times (not at all)	0 times (not at all)	1 to 3 times	1 to 3 times
3.902	7 to 11 times	7 to 10 times	4 to 6 times	0 times (not at all)	1 to 3 times	0 glasses (not at all)	7 days (everyday)	0 times (not at all)	0 times (not at all)	0 times (not at all)	0 times (not at all)	0 times (not at all)
3.81	7 to 11 times	7 to 10 times	7 to 10 times	0 times (not at all)	1 to 3 times	7 to 10 glasses	7 days (everyday)	0 times (not at all)	0 times (not at all)	0 times (not at all)	0 times (not at all)	1 to 3 times
3.4	7 to 11 times	7 to 10 times	4 to 6 times	0 times (not at all)	1 to 3 times	1 to 3 glasses	4 days	1 to 3 times	0 times (not at all)	0 times (not at all)	1 to 3 times	4 to 6 times
3.52	7 to 11 times	7 to 10 times	4 to 6 times	0 times (not at all)	1 to 3 times	0 glasses (not at all)	7 days (everyday)	1 to 3 times	0 times (not at all)	1 to 3 times	0 times (not at all)	1 to 3 times
3	7 to 11 times	7 to 10 times	7 to 10 times	1 to 3 times	4 to 6 times	0 glasses (not at all)	0 days (not at all)	1 to 3 times	4 to 6 times	4 to 6 times	1 to 3 times	1 to 3 times
3.3	7 to 11 times	7 to 10 times	7 to 10 times	1 to 3 times	1 to 3 times	0 glasses (not at all)	5 days	0 times (not at all)	0 times (not at all)	0 times (not at all)	1 to 3 times	0 times (not at all)
3.72	7 to 11 times	7 to 10 times	1 to 3 times	1 to 3 times	1 to 3 times	1 to 3 glasses	0 days (not at all)	1 to 3 times	0 times (not at all)	0 times (not at all)	0 times (not at all)	1 to 3 times
2.28	7 to 11 times	7 to 10 times	7 to 10 times	1 to 3 times	4 to 6 times	0 glasses (not at all)	3 days	0 times (not at all)	1 to 3 times	7 to 10 times	0 times (not at all)	1 to 3 times
3.04	7 to 11 times	7 to 10 times	7 to 10 times	1 to 3 times	0 times (not at all)	0 glasses (not at all)	2 days	1 to 3 times	0 times (not at all)	0 times (not at all)	0 times (not at all)	1 to 3 times
3.46	7 to 11 times	7 to 10 times	4 to 6 times	7 to 10 times	1 to 3 times	1 to 3 glasses	7 days (everyday)	1 to 3 times	0 times (not at all)	0 times (not at all)	0 times (not at all)	0 times (not at all)
3.23	7 to 11 times	7 to 10 times	4 to 6 times	4 to 6 times	4 to 6 times	0 glasses (not at all)	7 days (everyday)	1 to 3 times	0 times (not at all)	0 times (not at all)	0 times (not at all)	1 to 3 times
3.01	7 to 11 times	7 to 10 times	4 to 6 times	0 times (not at all)	1 to 3 times	0 glasses (not at all)	2 days	11 times or more	11 times or more	0 times (not at all)	0 times (not at all)	1 to 3 times
2.9	7 to 11 times	7 to 10 times	1 to 3 times	0 times (not at all)	1 to 3 times	0 glasses (not at all)	0 days (not at all)	0 times (not at all)	0 times (not at all)	0 times (not at all)	0 times (not at all)	1 to 3 times
3.96	7 to 11 times	7 to 10 times	7 to 10 times	0 times (not at all)	4 to 6 times	0 glasses (not at all)	6 days	1 to 3 times	1 to 3 times	0 times (not at all)	0 times (not at all)	0 times (not at all)
4	7 to 11 times	7 to 10 times	11 times or more	11 times or more	1 to 3 times	0 glasses (not at all)	6 days	1 to 3 times	0 times (not at all)	0 times (not at all)	1 to 3 times	1 to 3 times
4	7 to 11 times	7 to 10 times	7 to 10 times	0 times (not at all)	1 to 3 times	0 glasses (not at all)	7 days (everyday)	0 times (not at all)	0 times (not at all)	0 times (not at all)	0 times (not at all)	1 to 3 times
4	7 to 11 times	7 to 10 times	4 to 6 times	0 times (not at all)	4 to 6 times	7 to 10 glasses	7 days (everyday)	0 times (not at all)	0 times (not at all)	0 times (not at all)	0 times (not at all)	0 times (not at all)
3.9	7 to 11 times	7 to 10 times	7 to 10 times	1 to 3 times	1 to 3 times	0 glasses (not at all)	7 days (everyday)	1 to 3 times	0 times (not at all)	0 times (not at all)	1 to 3 times	4 to 6 times
3.92	7 to 11 times	7 to 10 times	11 times or more	0 times (not at all)	4 to 6 times	0 glasses (not at all)	7 days (everyday)	0 times (not at all)	0 times (not at all)	0 times (not at all)	1 to 3 times	1 to 3 times
3.61	7 to 11 times	7 to 10 times	7 to 10 times	1 to 3 times	1 to 3 times	0 glasses (not at all)	7 days (everyday)	0 times (not at all)	0 times (not at all)	0 times (not at all)	4 to 6 times	0 times (not at all)
3.8	7 to 11 times	7 to 10 times	4 to 6 times	0 times (not at all)	1 to 3 times	0 glasses (not at all)	3 days	0 times (not at all)	0 times (not at all)	0 times (not at all)	0 times (not at all)	0 times (not at all)
3.3	7 to 11 times	7 to 10 times	4 to 6 times	0 times (not at all)	4 to 6 times	0 glasses (not at all)	6 days	0 times (not at all)	0 times (not at all)	0 times (not at all)	0 times (not at all)	0 times (not at all)
3.2	7 to 11 times	7 to 10 times	7 to 10 times	0 times (not at all)	1 to 3 times	0 glasses (not at all)	4 days	1 to 3 times	0 times (not at all)	0 times (not at all)	0 times (not at all)	1 to 3 times
2.75	7 to 11 times	7 to 10 times	4 to 6 times	1 to 3 times	1 to 3 times	0 glasses (not at all)	2 days	1 to 3 times	0 times (not at all)	0 times (not at all)	0 times (not at all)	0 times (not at all)
3.6	7 to 11 times	7 to 10 times	4 to 6 times	0 times (not at all)	1 to 3 times	0 glasses (not at all)	4 days	0 times (not at all)	0 times (not at all)	0 times (not at all)	0 times (not at all)	1 to 3 times
2.7	7 to 11 times	7 to 10 times	0 times (not at all)	1 to 3 times	1 to 3 times	4 to 6 glasses	7 days (everyday)	4 to 6 times	0 times (not at all)	0 times (not at all)	1 to 3 times	1 to 3 times
3.1	7 to 11 times	7 to 10 times	7 to 10 times	1 to 3 times	1 to 3 times	1 to 3 glasses	0 days (not at all)	1 to 3 times	1 to 3 times	0 times (not at all)	0 times (not at all)	1 to 3 times
2.9	7 to 11 times	7 to 10 times	7 to 10 times	1 to 3 times	1 to 3 times	1 to 3 glasses	0 days (not at all)	1 to 3 times	1 to 3 times	0 times (not at all)	0 times (not at all)	1 to 3 times
3.41	7 to 11 times	7 to 10 times	7 to 10 times	1 to 3 times	1 to 3 times	7 to 10 glasses	1 day	1 to 3 times	0 times (not at all)	0 times (not at all)	0 times (not at all)	1 to 3 times
3.85	7 to 11 times	7 to 10 times	7 to 10 times	1 to 3 times	1 to 3 times	0 glasses (not at all)	7 days (everyday)	0 times (not at all)	0 times (not at all)	0 times (not at all)	0 times (not at all)	0 times (not at all)
3.8	7 to 11 times	7 to 10 times	7 to 10 times	1 to 3 times	7 to 10 times	1 to 3 glasses	7 days (everyday)	4 to 6 times	4 to 6 times	0 times (not at all)	0 times (not at all)	4 to 6 times
3.8	7 to 11 times	7 to 10 times	4 to 6 times	1 to 3 times	1 to 3 times	0 glasses (not at all)	7 days (everyday)	0 times (not at all)	0 times (not at all)	1 to 3 times	4 to 6 times	0 times (not at all)
3.6	7 to 11 times	7 to 10 times	4 to 6 times	1 to 3 times	1 to 3 times	1 to 3 glasses	7 days (everyday)	1 to 3 times	1 to 3 times	0 times (not at all)	0 times (not at all)	1 to 3 times
3.11	7 to 11 times	7 to 10 times	4 to 6 times	0 times (not at all)	4 to 6 times	0 glasses (not at all)	4 days	0 times (not at all)	1 to 3 times	0 times (not at all)	1 to 3 times	0 times (not at all)
4	7 to 11 times	7 to 10 times	4 to 6 times	0 times (not at all)	4 to 6 times	0 glasses (not at all)	3 days	1 to 3 times	0 times (not at all)	0 times (not at all)	0 times (not at all)	1 to 3 times
2.7	7 to 11 times	7 to 10 times	1 to 3 times	0 times (not at all)	1 to 3 times	0 glasses (not at all)	7 days (everyday)	0 times (not at all)	1 to 3 times	0 times (not at all)	1 to 3 times	0 times (not at all)
2.9	7 to 11 times	7 to 10 times	4 to 6 times	0 times (not at all)	4 to 6 times	1 to 3 glasses	5 days	0 times (not at all)	0 times (not at all)	0 times (not at all)	0 times (not at all)	1 to 3 times
3.1	7 to 11 times	7 to 10 times	1 to 3 times	0 times (not at all)	1 to 3 times	1 to 3 glasses	4 days	0 times (not at all)	0 times (not at all)	0 times (not at all)	1 to 3 times	0 times (not at all)
3.5	7 to 11 times	7 to 10 times	4 to 6 times	1 to 3 times	7 to 10 times	1 to 3 glasses	2 days	1 to 3 times	0 times (not at all)	0 times (not at all)	0 times (not at all)	0 times (not at all)
3.5	7 to 11 times	7 to 10 times	7 to 10 times	1 to 3 times	0 times (not at all)	0 glasses (not at all)	0 days (not at all)	0 times (not at all)	0 times (not at all)	0 times (not at all)	0 times (not at all)	0 times (not at all)
3.7	7 to 11 times	7 to 10 times	4 to 6 times	7 to 10 times	1 to 3 times	0 glasses (not at all)	7 days (everyday)	0 times (not at all)	0 times (not at all)	0 times (not at all)	0 times (not at all)	0 times (not at all)
4	7 to 11 times	7 to 10 times	4 to 6 times	0 times (not at all)	4 to 6 times	0 glasses (not at all)	5 days	0 times (not at all)	0 times (not at all)	0 times (not at all)	0 times (not at all)	1 to 3 times
3.01	7 to 11 times	7 to 10 times	11 times or more	7 to 10 times	1 to 3 times	0 glasses (not at all)	3 days	1 to 3 times	1 to 3 times	0 times (not at all)	0 times (not at all)	1 to 3 times
3.3	7 to 11 times	7 to 10 times	11 times or more	0 times (not at all)	0 times (not at all)	0 glasses (not at all)	3 days	0 times (not at all)	0 times (not at all)	0 times (not at all)	0 times (not at all)	0 times (not at all)
3.53	7 to 11 times	7 to 10 times	7 to 10 times	4 to 6 times	4 to 6 times	0 glasses (not at all)	5 days	0 times (not at all)	0 times (not at all)	0 times (not at all)	0 times (not at all)	1 to 3 times
4	7 to 11 times	7 to 10 times	11 times or more	0 times (not at all)	4 to 6 times	0 glasses (not at all)	7 days (everyday)	0 times (not at all)	0 times (not at all)	0 times (not at all)	0 times (not at all)	0 times (not at all)
3.8	7 to 11 times	7 to 10 times	11 times or more	0 times (not at all)	0 times (not at all)	0 glasses (not at all)	7 days (everyday)	0 times (not at all)	0 times (not at all)	0 times (not at all)	0 times (not at all)	1 to 3 times
3.8	7 to 11 times	7 to 10 times	7 to 10 times	1 to 3 times	0 times (not at all)	4 to 6 glasses	6 days	0 times (not at all)	0 times (not at all)	0 times (not at all)	0 times (not at all)	4 to 6 times
3.8	7 to 11 times	7 to 10 times	4 to 6 times	4 to 6 times	4 to 6 times	0 glasses (not at all)	7 days (everyday)	1 to 3 times	0 times (not at all)	0 times (not at all)	0 times (not at all)	1 to 3 times
3.94	7 to 11 times	7 to 10 times	11 times or more	1 to 3 times	0 times (not at all)	0 glasses (not at all)	7 days (everyday)	0 times (not at all)	0 times (not at all)	0 times (not at all)	0 times (not at all)	1 to 3 times
3	7 to 11 times	7 to 10 times	1 to 3 times	0 times (not at all)	1 to 3 times	0 glasses (not at all)	3 days	0 times (not at all)	0 times (not at all)	0 times (not at all)	0 times (not at all)	1 to 3 times
3.7	7 to 11 times	7 to 10 times	4 to 6 times	1 to 3 times	1 to 3 times	1 to 3 glasses	7 days (everyday)	0 times (not at all)	0 times (not at all)	0 times (not at all)	1 to 3 times	0 times (not at all)
4	7 to 11 times	7 to 10 times	7 to 10 times	0 times (not at all)	0 times (not at all)	1 to 3 glasses	1 day	0 times (not at all)	1 to 3 times	0 times (not at all)	0 times (not at all)	1 to 3 times
3.7	7 to 11 times	7 to 10 times	7 to 10 times	0 times (not at all)	1 to 3 times	1 to 3 glasses	4 days	7 to 10 times	0 times (not at all)	0 times (not at all)	4 to 6 times	1 to 3 times
3.3	7 to 11 times	7 to 10 times	7 to 10 times	7 to 10 times	7 to 10 times	1 to 3 glasses	7 days (everyday)	4 to 6 times	0 times (not at all)	0 times (not at all)	4 to 6 times	1 to 3 times
3.5	7 to 11 times	7 to 10 times	1 to 3 times	1 to 3 times	0 times (not at all)	0 glasses (not at all)	2 days	0 times (not at all)	0 times (not at all)	0 times (not at all)	0 times (not at all)	1 to 3 times
3.51	7 to 11 times	7 to 10 times	7 to 10 times	1 to 3 times	4 to 6 times	0 glasses (not at all)	5 days	1 to 3 times	1 to 3 times	0 times (not at all)	1 to 3 times	1 to 3 times
3.2	7 to 11 times	7 to 10 times	4 to 6 times	4 to 6 times	1 to 3 times	4 to 6 glasses	0 days (not at all)	1 to 3 times	0 times (not at all)	4 to 6 times	0 times (not at all)	1 to 3 times
3.09	7 to 11 times	7 to 10 times	1 to 3 times	0 times (not at all)	7 to 10 times	1 to 3 glasses	5 days	0 times (not at all)	4 to 6 times	0 times (not at all)	0 times (not at all)	1 to 3 times
3.487	7 to 11 times	7 to 10 times	4 to 6 times	4 to 6 times	0 times (not at all)	0 glasses (not at all)	7 days (everyday)	7 to 10 times	0 times (not at all)	0 times (not at all)	7 to 10 times	7 to 10 times
4	7 to 11 times	7 to 10 times	0 times (not at all)	1 to 3 times	1 to 3 times	0 glasses (not at all)	1 day	0 times (not at all)	0 times (not at all)	0 times (not at all)	4 to 6 times	0 times (not at all)
2.9	7 to 11 times	7 to 10 times	4 to 6 times	0 times (not at all)	1 to 3 times	0 glasses (not at all)	3 days	0 times (not at all)	0 times (not at all)	0 times (not at all)	0 times (not at all)	0 times (not at all)
3.73	7 to 11 times	7 to 10 times	4 to 6 times	1 to 3 times	1 to 3 times	0 glasses (not at all)	6 days	1 to 3 times	0 times (not at all)	0 times (not at all)	0 times (not at all)	1 to 3 times
3.76	7 to 11 times	7 to 10 times	0 times (not at all)	1 to 3 times	1 to 3 times	1 to 3 glasses	0 days (not at all)	1 to 3 times	0 times (not at all)	0 times (not at all)	0 times (not at all)	1 to 3 times
3.76	7 to 11 times	7 to 10 times	1 to 3 times	1 to 3 times	0 times (not at all)	1 to 3 glasses	7 days (everyday)	1 to 3 times	0 times (not at all)	0 times (not at all)	0 times (not at all)	0 times (not at all)
3.9	7 to 11 times	7 to 10 times	1 to 3 times	0 times (not at all)	1 to 3 times	0 glasses (not at all)	7 days (everyday)	0 times (not at all)	0 times (not at all)	0 times (not at all)	4 to 6 times	1 to 3 times
3.94	7 to 11 times	7 to 10 times	1 to 3 times	1 to 3 times	11 times or more	1 to 3 glasses	7 days (everyday)	1 to 3 times	0 times (not at all)	0 times (not at all)	0 times (not at all)	1 to 3 times

## Sheet: Smoking, alcohol & drugs
Current GPA	Cigarettes	Smoker	Vaping	Vaping frequency	Alcohol	Alcohol use	Marijuana	Marijuana use	Pain killer abuse	Other drugs
3.75	Yes	No	No		Yes	1 or 2 days	No	1 day	0 times (not at all)	No
4	Yes	No	No	0 days (not at all)	Yes	10 to 19 days	Yes	7 days (everyday)	0 times (not at all)	Yes
4	Yes	No	Yes	0 days (not at all)	Yes	3 to 5 days	Yes	1 day	0 times (not at all)	No
3.13	Yes	No	No	3 days	Yes	3 to 5 days	Yes	5 days	0 times (not at all)	Yes
3.47	Yes	No	No	7 days (everyday)	Yes	0 days (not at all)	Yes	0 times (not at all)	0 times (not at all)	No
2.7	Yes	No	Yes	0 days (not at all)	Yes	0 days (not at all)	Yes	7 days (everyday)	0 times (not at all)	No
4	Yes	No	Yes	0 days (not at all)	Yes	0 days (not at all)	Yes	7 days (everyday)	0 times (not at all)	No
3.9	Yes	No	No	1 day	Yes	3 to 5 days	Yes	7 days (everyday)	0 times (not at all)	No
3.8	Yes	No	No	7 days (everyday)	Yes	0 days (not at all)	No	0 times (not at all)	0 times (not at all)	No
2.3	Yes	No	Yes	3 days	Yes	1 or 2 days	Yes	7 days (everyday)	3 to 9 times	No
2.5	Yes	No	Yes	7 days (everyday)	Yes	10 to 19 days	Yes	0 times (not at all)	20 to 39 times	Yes
3.75	Yes	No	Yes	0 days (not at all)	Yes	0 days (not at all)	Yes	0 times (not at all)	0 times (not at all)	No
3.6	Yes	No	No	7 days (everyday)	Yes	1 or 2 days	Yes	3 days	0 times (not at all)	Yes
2.6	Yes	No	Yes	0 days (not at all)	Yes	0 days (not at all)	Yes	0 times (not at all)	0 times (not at all)	Yes
3.9	Yes	No	Yes	0 days (not at all)	Yes	0 days (not at all)	No	0 times (not at all)	0 times (not at all)	No
4.48	Yes	No	Yes	0 days (not at all)	Yes	1 or 2 days	Yes	0 times (not at all)	1 or 2 times	No
4	Yes	No	Yes	0 days (not at all)	Yes	1 or 2 days	Yes	0 times (not at all)	0 times (not at all)	No
3.1	Yes	No	Yes	1 day	Yes	1 or 2 days	Yes	0 times (not at all)	0 times (not at all)	No
3.5	Yes	No	Yes	1 day	Yes	0 days (not at all)	Yes	0 times (not at all)	0 times (not at all)	No
3.01	Yes	No	Yes	1 day	Yes	0 days (not at all)	Yes	0 times (not at all)	0 times (not at all)	No
2.8	Yes	No	Yes	0 days (not at all)	Yes	1 or 2 days	Yes	0 times (not at all)	0 times (not at all)	No
0.57	Yes	No	Yes	7 days (everyday)	Yes	3 to 5 days	Yes	7 days (everyday)	1 or 2 times	Yes
3.67	Yes	No	No	5 days	Yes	0 days (not at all)	No	0 times (not at all)	0 times (not at all)	No
3.5	Yes	No	Yes	0 days (not at all)	Yes	1 or 2 days	No	0 times (not at all)	0 times (not at all)	No
3.2	Yes	No	Yes	7 days (everyday)	Yes	3 to 5 days	Yes	0 times (not at all)	0 times (not at all)	No
3.5	Yes	No	Yes	0 days (not at all)	Yes	1 or 2 days	Yes	0 times (not at all)	0 times (not at all)	No
3.1	Yes	No	No	0 days (not at all)	Yes	10 to 19 days	Yes	7 days (everyday)	0 times (not at all)	Yes
2.5	Yes	No	No	3 days	Yes	1 or 2 days	Yes	0 times (not at all)	3 to 9 times	No
3.4	Yes	No	Yes	7 days (everyday)	Yes	1 or 2 days	Yes	0 times (not at all)	0 times (not at all)	No
3.5	Yes	No	Yes	2 days	Yes	10 to 19 days	Yes	3 days	1 or 2 times	No
3.7	Yes	No	No	0 days (not at all)	Yes	1 or 2 days	No	0 times (not at all)	0 times (not at all)	No
3.2	Yes	No	Yes	0 days (not at all)	Yes	6 to 9 days	Yes	2 days	0 times (not at all)	Yes
3.2	Yes	No	Yes	0 days (not at all)	Yes	6 to 9 days	Yes	0 times (not at all)	0 times (not at all)	Yes
3.2	Yes	No	No	0 days (not at all)	Yes	1 or 2 days	No	0 times (not at all)	0 times (not at all)	No
3.47	Yes	No	Yes	1 day	Yes	3 to 5 days	No	0 times (not at all)	0 times (not at all)	No
3.5	Yes	No	Yes	0 days (not at all)	Yes	3 to 5 days	Yes	0 times (not at all)	0 times (not at all)	No
2.5	Yes	Yes	Yes	7 days (everyday)	Yes	6 to 9 days	Yes	0 times (not at all)	0 times (not at all)	Yes
3.75	Yes	Yes	Yes	7 days (everyday)	Yes	6 to 9 days	Yes	0 times (not at all)	0 times (not at all)	Yes
3.51	Yes	No	Yes	7 days (everyday)	Yes	6 to 9 days	Yes	0 times (not at all)	0 times (not at all)	No
3.78	Yes	No	No	3 days	Yes	0 days (not at all)	No	0 times (not at all)	0 times (not at all)	No
3.5	Yes	Yes	Yes	1 day	Yes	20 to 29 days	Yes	1 day	1 or 2 times	Yes
3.85	Yes	No	Yes	7 days (everyday)	Yes	6 to 9 days	Yes	2 days	0 times (not at all)	Yes
2.974	Yes	No	Yes	0 days (not at all)	Yes	0 days (not at all)	Yes	0 times (not at all)	0 times (not at all)	No
3.3	Yes	Yes	Yes	7 days (everyday)	Yes	3 to 5 days	Yes	5 days	0 times (not at all)	Yes
3.5	Yes	No	Yes	0 days (not at all)	Yes	10 to 19 days	Yes	0 times (not at all)	0 times (not at all)	No
3	Yes	No	No	1 day	Yes	1 or 2 days	Yes	0 times (not at all)	0 times (not at all)	No
3.3	Yes	No	Yes	7 days (everyday)	Yes	1 or 2 days	Yes	0 times (not at all)	0 times (not at all)	No
3	Yes	No	Yes	0 days (not at all)	Yes	0 days (not at all)	No	0 times (not at all)	0 times (not at all)	No
3.9	Yes	No	Yes	0 days (not at all)	Yes	0 days (not at all)	Yes	0 times (not at all)	0 times (not at all)	No
3.45	Yes	Yes	Yes	0 days (not at all)	Yes	1 or 2 days	Yes	0 times (not at all)	3 to 9 times	No
3.5	Yes	No	Yes	0 days (not at all)	Yes	0 days (not at all)	Yes	0 times (not at all)	0 times (not at all)	Yes
3.927	Yes	No	No	1 day	Yes	1 or 2 days	No	0 times (not at all)	0 times (not at all)	No
3.61	Yes	No	Yes	0 days (not at all)	Yes	6 to 9 days	No	6 days	0 times (not at all)	No
3.07	Yes	No	No	4 days	Yes	3 to 5 days	Yes	0 times (not at all)	0 times (not at all)	No
2.5	Yes	No	Yes	5 days	Yes	6 to 9 days	Yes	7 days (everyday)	3 to 9 times	No
3.43	Yes	No	No	0 days (not at all)	Yes	6 to 9 days	Yes	0 times (not at all)	0 times (not at all)	No
2.6	Yes	Yes	Yes	0 days (not at all)	Yes	10 to 19 days	Yes	0 times (not at all)	1 or 2 times	Yes
3.6	Yes	Yes	Yes	0 days (not at all)	Yes	6 to 9 days	Yes	0 times (not at all)	0 times (not at all)	Yes
2.99	Yes	No	Yes	2 days	Yes	1 or 2 days	Yes	0 times (not at all)	0 times (not at all)	No
3	Yes	No	No	7 days (everyday)	Yes	20 to 29 days	Yes	0 times (not at all)	0 times (not at all)	Yes
2.51	Yes	No	Yes	0 days (not at all)	Yes	6 to 9 days	Yes	7 days (everyday)	0 times (not at all)	Yes
3.86	Yes	No	No	3 days	Yes	3 to 5 days	No	0 times (not at all)	0 times (not at all)	No
3.7	Yes	No	No	0 days (not at all)	Yes	1 or 2 days	No	0 times (not at all)	0 times (not at all)	No
3.3	Yes	No	No	0 days (not at all)	Yes	3 to 5 days	Yes	0 times (not at all)	0 times (not at all)	No
3.5	Yes	No	Yes	0 days (not at all)	Yes	0 days (not at all)	Yes	0 times (not at all)	1 or 2 times	Yes
3.76	Yes	No	Yes	0 days (not at all)	Yes	1 or 2 days	Yes	0 times (not at all)	0 times (not at all)	No
3.6	Yes	No	Yes	1 day	Yes	10 to 19 days	Yes	7 days (everyday)	3 to 9 times	Yes
3.34	Yes	Yes	Yes	0 days (not at all)	Yes	10 to 19 days	Yes	0 times (not at all)	0 times (not at all)	Yes
2.9	Yes	No	No	1 day	Yes	0 days (not at all)	Yes	0 times (not at all)	0 times (not at all)	No
3.1	Yes	No	Yes	0 days (not at all)	Yes	1 or 2 days	No	0 times (not at all)	0 times (not at all)	No
2.7	Yes	No	Yes	0 days (not at all)	Yes	0 days (not at all)	Yes	0 times (not at all)	0 times (not at all)	No
4	Yes	No	No	3 days	Yes	1 or 2 days	No	0 times (not at all)	0 times (not at all)	No
3.2	Yes	No	No	1 day	Yes	3 to 5 days	Yes	1 day	0 times (not at all)	No
3	Yes	No	Yes	2 days	Yes	1 or 2 days	Yes	6 days	0 times (not at all)	No
2.6	Yes	No	Yes	7 days (everyday)	Yes	1 or 2 days	Yes	7 days (everyday)	0 times (not at all)	Yes
3.2	Yes	Yes	Yes	0 days (not at all)	Yes	6 to 9 days	No	3 days	0 times (not at all)	No
3.2	Yes	No	Yes	0 days (not at all)	Yes	3 to 5 days	Yes	5 days	40 or more times	Yes
3.6	Yes	No	Yes	0 days (not at all)	Yes	3 to 5 days	Yes	5 days	40 or more times	Yes
3.9	Yes	No	Yes	0 days (not at all)	Yes	3 to 5 days	Yes	0 times (not at all)	0 times (not at all)	Yes
3.11	Yes	Yes	Yes	1 day	Yes	3 to 5 days	Yes	0 times (not at all)	0 times (not at all)	Yes
3.8	Yes	No	Yes	0 days (not at all)	Yes	0 days (not at all)	Yes	0 times (not at all)	10 to 19 times	Yes
2.9	Yes	Yes	Yes	7 days (everyday)	Yes	3 to 5 days	Yes	3 days	3 to 9 times	Yes
3.55	Yes	No	Yes	0 days (not at all)	Yes	0 days (not at all)	No	0 times (not at all)	0 times (not at all)	No
2.78	Yes	No	No	2 days	Yes	10 to 19 days	Yes	5 days	0 times (not at all)	No
3.2	Yes	No	Yes	0 days (not at all)	Yes	6 to 9 days	Yes	0 times (not at all)	1 or 2 times	No
3.11	Yes	No	Yes	0 days (not at all)	Yes	1 or 2 days	Yes	0 times (not at all)	0 times (not at all)	No
3.1	Yes	No	Yes	3 days	Yes	1 or 2 days	Yes	7 days (everyday)	0 times (not at all)	No
3.45	Yes	No	Yes	0 days (not at all)	No	1 or 2 days	No	0 times (not at all)	0 times (not at all)	No
4	Yes	No	No	7 days (everyday)	Yes	1 or 2 days	No	0 times (not at all)	0 times (not at all)	No
3.2	Yes	No	No	7 days (everyday)	Yes	1 or 2 days	Yes	0 times (not at all)	0 times (not at all)	No
3.4	Yes	No	Yes	3 days	Yes	10 to 19 days	Yes	3 days	0 times (not at all)	Yes
2.3	Yes	No	Yes	1 day	Yes	1 or 2 days	Yes	0 times (not at all)	0 times (not at all)	No
1.9	Yes	No	Yes	1 day	Yes	1 or 2 days	Yes	0 times (not at all)	0 times (not at all)	No
3	Yes	No	Yes	7 days (everyday)	Yes	10 to 19 days	Yes	7 days (everyday)	1 or 2 times	Yes
3.8	Yes	No	Yes	0 days (not at all)	Yes	1 or 2 days	Yes	0 times (not at all)	0 times (not at all)	No
3	Yes	No	Yes	0 days (not at all)	Yes	0 days (not at all)	Yes	0 times (not at all)	0 times (not at all)	No
3.78	Yes	No	Yes	7 days (everyday)	Yes	0 days (not at all)	Yes	0 times (not at all)	40 or more times	Yes
2.76	Yes	No	Yes	0 days (not at all)	Yes	0 days (not at all)	Yes	0 times (not at all)	0 times (not at all)	No
0.94	Yes	No	Yes	0 days (not at all)	Yes	0 days (not at all)	No	0 times (not at all)	0 times (not at all)	No
4	Yes	No	Yes	1 day	Yes	1 or 2 days	Yes	1 day	1 or 2 times	Yes
4	Yes	No	Yes	7 days (everyday)	Yes	1 or 2 days	Yes	7 days (everyday)	0 times (not at all)	No
3.7	Yes	No	Yes	2 days	Yes	10 to 19 days	No	0 times (not at all)	0 times (not at all)	No
3.1	Yes	No	Yes	0 days (not at all)	Yes	0 days (not at all)	Yes	0 times (not at all)	3 to 9 times	Yes
2.9	Yes	No	Yes	7 days (everyday)	Yes	1 or 2 days	Yes	7 days (everyday)	0 times (not at all)	No
3.2	Yes	Yes	Yes	7 days (everyday)	Yes	0 days (not at all)	Yes	7 days (everyday)	40 or more times	Yes
3.09	Yes	No	Yes	1 day	No	0 days (not at all)	No	5 days	0 times (not at all)	No
2.9	Yes	No	No	0 days (not at all)	Yes	1 or 2 days	No	0 times (not at all)	0 times (not at all)	No
3.54	Yes	No	Yes	1 day	Yes	20 to 29 days	Yes	5 days	0 times (not at all)	Yes
3.56	Yes	No	Yes	0 days (not at all)	Yes	1 or 2 days	Yes	0 times (not at all)	10 to 19 times	No
3.3	Yes	No	Yes	7 days (everyday)	Yes	3 to 5 days	No	1 day	0 times (not at all)	No
2.8	Yes	No	Yes	0 days (not at all)	Yes	3 to 5 days	No	0 times (not at all)	0 times (not at all)	No
3.7	Yes	No	No	1 day	Yes	3 to 5 days	Yes	6 days	0 times (not at all)	Yes
3.82	Yes	No	Yes	7 days (everyday)	Yes	3 to 5 days	Yes	7 days (everyday)	3 to 9 times	Yes
2.4	Yes	No	Yes	7 days (everyday)	Yes	10 to 19 days	Yes	7 days (everyday)	3 to 9 times	Yes
3.75	Yes	No	Yes	1 day	Yes	20 to 29 days	Yes	0 times (not at all)	0 times (not at all)	No
2.91	Yes	No	Yes	0 days (not at all)	Yes	6 to 9 days	Yes	0 times (not at all)	1 or 2 times	Yes
3.83	Yes	No	Yes	0 days (not at all)	Yes	1 or 2 days	Yes	0 times (not at all)	0 times (not at all)	No
2.54	Yes	No	Yes	7 days (everyday)	Yes	6 to 9 days	Yes	0 times (not at all)	0 times (not at all)	No
3.75	Yes	No	Yes	7 days (everyday)	Yes	3 to 5 days	No	0 times (not at all)	0 times (not at all)	No
2.7	Yes	No	Yes	7 days (everyday)	Yes	3 to 5 days	Yes	4 days	1 or 2 times	Yes
3.94	No		No		Yes	1 or 2 days	No	0 times (not at all)	0 times (not at all)	No
3.75	No		No		Yes	0 days (not at all)	Yes	1 day	3 to 9 times	Yes
3.4	No	No	Yes	1 day	Yes	1 or 2 days	No	1 day	0 times (not at all)	No
3.2	No	No	Yes	2 days	Yes	1 or 2 days	Yes	0 times (not at all)	0 times (not at all)	No
3.3	No	No	Yes	0 days (not at all)	Yes	1 or 2 days	Yes	1 day	0 times (not at all)	No
3.69	No	No	Yes	0 days (not at all)	Yes	1 or 2 days	No	0 times (not at all)	0 times (not at all)	No
4	No	No	Yes	3 days	Yes	3 to 5 days	No	0 times (not at all)	0 times (not at all)	No
3.8	No	No	No	3 days	Yes	1 or 2 days	Yes	0 times (not at all)	0 times (not at all)	No
3.91	No	No	No	3 days	Yes	1 or 2 days	No	0 times (not at all)	0 times (not at all)	No
2.8	No	No	No	7 days (everyday)	No	1 or 2 days	No	3 days	0 times (not at all)	No
3.3	No	No	No	7 days (everyday)	Yes	1 or 2 days	No	7 days (everyday)	0 times (not at all)	No
3.6	No	No	No	1 day	Yes	1 or 2 days	Yes	0 times (not at all)	0 times (not at all)	No
3.95	No	No	Yes	0 days (not at all)	Yes	0 days (not at all)	No	0 times (not at all)	0 times (not at all)	No
3.45	No	No	No	0 days (not at all)	Yes	10 to 19 days	Yes	0 times (not at all)	0 times (not at all)	No
4	No	No	No	0 days (not at all)	Yes	3 to 5 days	Yes	3 days	20 to 39 times	Yes
3.7	No	No	No	0 days (not at all)	Yes	1 or 2 days	No	0 times (not at all)	0 times (not at all)	No
3.2	No	No	Yes	7 days (everyday)	Yes	1 or 2 days	Yes	4 days	0 times (not at all)	No
3.8	No	No	Yes	1 day	Yes	1 or 2 days	Yes	2 days	0 times (not at all)	No
3.75	No	Yes	No	0 days (not at all)	Yes	0 days (not at all)	No	0 times (not at all)	0 times (not at all)	No
3.9	No	No	Yes	0 days (not at all)	Yes	10 to 19 days	Yes	0 times (not at all)	0 times (not at all)	No
3.7	No	No	No	0 days (not at all)	Yes	1 or 2 days	No	0 times (not at all)	0 times (not at all)	No
3.266	No	No	No	0 days (not at all)	Yes	3 to 5 days	Yes	0 times (not at all)	0 times (not at all)	No
3.45	No	No	No	3 days	Yes	1 or 2 days	No	7 days (everyday)	0 times (not at all)	No
1.7	No	No	No	3 days	No	1 or 2 days	Yes	3 days	0 times (not at all)	No
3.6	No	No	Yes	0 days (not at all)	Yes	0 days (not at all)	Yes	1 day	0 times (not at all)	No
3.5	No	No	No	7 days (everyday)	Yes	1 or 2 days	No	0 times (not at all)	0 times (not at all)	No
1.65	No	No	Yes	0 days (not at all)	Yes	0 days (not at all)	No	0 times (not at all)	0 times (not at all)	No
3.6	No	No	No	0 days (not at all)	Yes	1 or 2 days	No	1 day	0 times (not at all)	No
4	No	No	No	1 day	No	0 days (not at all)	No	5 days	0 times (not at all)	No
3.75	No	No	No	1 day	Yes	0 days (not at all)	No	0 times (not at all)	0 times (not at all)	No
3.3	No	Yes	No	0 days (not at all)	No	0 days (not at all)	No	0 times (not at all)	0 times (not at all)	No
3.7	No	Yes	Yes	0 days (not at all)	Yes	0 days (not at all)	No	0 times (not at all)	0 times (not at all)	No
2.1	No	No	Yes	0 days (not at all)	Yes	6 to 9 days	Yes	0 times (not at all)	0 times (not at all)	No
3.4	No	No	Yes	0 days (not at all)	Yes	6 to 9 days	No	0 times (not at all)	0 times (not at all)	No
3.6	No	No	Yes	0 days (not at all)	Yes	0 days (not at all)	No	0 times (not at all)	1 or 2 times	No
3.7	No	No	Yes	0 days (not at all)	Yes	0 days (not at all)	Yes	0 times (not at all)	0 times (not at all)	No
3.2	No	No	No	0 days (not at all)	Yes	1 or 2 days	Yes	0 times (not at all)	0 times (not at all)	No
3.83	No	No	No	0 days (not at all)	No	1 or 2 days	No	0 times (not at all)	0 times (not at all)	No
2.7	No	No	No	7 days (everyday)	No	1 or 2 days	No	0 times (not at all)	0 times (not at all)	No
3	No	No	Yes	0 days (not at all)	Yes	1 or 2 days	No	1 day	0 times (not at all)	No
3.2	No	No	Yes	2 days	No	1 or 2 days	No	1 day	0 times (not at all)	No
4	No	Yes	No	7 days (everyday)	Yes	0 days (not at all)	No	3 days	0 times (not at all)	No
3.8	No	No	No	7 days (everyday)	No	1 or 2 days	No	0 times (not at all)	0 times (not at all)	No
3.5	No	No	No	7 days (everyday)	Yes	1 or 2 days	Yes	0 times (not at all)	0 times (not at all)	No
3.5	No	No	No	0 days (not at all)	No	3 to 5 days	No	0 times (not at all)	0 times (not at all)	No
4	No	No	Yes	0 days (not at all)	Yes	6 to 9 days	Yes	0 times (not at all)	0 times (not at all)	No
2.5	No	No	No	0 days (not at all)	Yes	1 or 2 days	No	0 times (not at all)	0 times (not at all)	No
3.8	No	No	No	7 days (everyday)	Yes	0 days (not at all)	No	1 day	0 times (not at all)	No
4	No	Yes	No	1 day	No	0 days (not at all)	No	1 day	0 times (not at all)	No
4	No	No	Yes	0 days (not at all)	Yes	1 or 2 days	No	1 day	0 times (not at all)	No
3.56	No	No	No	0 days (not at all)	No	1 or 2 days	No	1 day	0 times (not at all)	No
4	No	No	Yes	0 days (not at all)	Yes	3 to 5 days	No	1 day	0 times (not at all)	No
4	No	No	Yes	0 days (not at all)	Yes	10 to 19 days	Yes	0 times (not at all)	0 times (not at all)	No
2.75	No	No	No	0 days (not at all)	Yes	3 to 5 days	Yes	0 times (not at all)	0 times (not at all)	No
4	No	Yes	Yes	1 day	Yes	6 to 9 days	Yes	0 times (not at all)	0 times (not at all)	No
4	No	Yes	Yes	0 days (not at all)	Yes	1 or 2 days	No	0 times (not at all)	0 times (not at all)	No
3.7	No	No	No	0 days (not at all)	No	1 or 2 days	No	0 times (not at all)	0 times (not at all)	No
3.5	No	No	No	7 days (everyday)	No	1 or 2 days	No	6 days	0 times (not at all)	No
3.75	No	No	No	7 days (everyday)	Yes	1 or 2 days	No	3 days	0 times (not at all)	No
4	No	No	No	0 days (not at all)	Yes	3 to 5 days	No	0 times (not at all)	0 times (not at all)	No
4	No	No	No	2 days	No	3 to 5 days	No	0 times (not at all)	0 times (not at all)	No
3	No	No	No	2 days	Yes	3 to 5 days	Yes	0 times (not at all)	0 times (not at all)	No
3.85	No	No	No	0 days (not at all)	Yes	0 days (not at all)	No	3 days	0 times (not at all)	No
3.45	No	No	No	0 days (not at all)	Yes	0 days (not at all)	No	3 days	0 times (not at all)	No
3.8	No	No	Yes	3 days	Yes	1 or 2 days	No	0 times (not at all)	0 times (not at all)	No
4	No	No	No	3 days	Yes	0 days (not at all)	No	0 times (not at all)	0 times (not at all)	No
2.5	No	No	No	0 days (not at all)	Yes	1 or 2 days	No	0 times (not at all)	0 times (not at all)	No
3.8	No	No	Yes	0 days (not at all)	Yes	1 or 2 days	No	0 times (not at all)	0 times (not at all)	No
3.2	No	No	Yes	0 days (not at all)	Yes	1 or 2 days	No	0 times (not at all)	0 times (not at all)	No
3.6	No	No	No	0 days (not at all)	No	1 or 2 days	No	0 times (not at all)	0 times (not at all)	No
3.94	No	No	Yes	7 days (everyday)	Yes	1 or 2 days	Yes	3 days	0 times (not at all)	Yes
4	No	No	No	7 days (everyday)	No	1 or 2 days	No	3 days	0 times (not at all)	No
2.7	No	No	Yes	2 days	Yes	1 or 2 days	Yes	0 times (not at all)	0 times (not at all)	No
3.75	No	No	No	2 days	No	1 or 2 days	No	0 times (not at all)	0 times (not at all)	No
3	No	No	No	2 days	Yes	0 days (not at all)	Yes	4 days	0 times (not at all)	No
4	No	No	No	2 days	Yes	3 to 5 days	No	4 days	0 times (not at all)	No
4	No	No	Yes	3 days	Yes	6 to 9 days	Yes	1 day	0 times (not at all)	No
3.5	No	No	No	3 days	Yes	0 days (not at all)	No	7 days (everyday)	0 times (not at all)	No
4	No	No	No	3 days	No	0 days (not at all)	No	7 days (everyday)	0 times (not at all)	No
3	No	No	No	3 days	No	0 days (not at all)	No	7 days (everyday)	0 times (not at all)	No
4	No	No	No	0 days (not at all)	Yes	1 or 2 days	No	1 day	0 times (not at all)	No
3.8	No	No	No	0 days (not at all)	Yes	1 or 2 days	No	1 day	0 times (not at all)	No
3.6	No	Yes	Yes	0 days (not at all)	No	6 to 9 days	No	0 times (not at all)	0 times (not at all)	No
3	No	Yes	No	0 days (not at all)	No	6 to 9 days	No	0 times (not at all)	0 times (not at all)	No
3	No	Yes	No	5 days	Yes	0 days (not at all)	No	5 days	0 times (not at all)	No
3.55	No	No	Yes	1 day	Yes	1 or 2 days	Yes	0 times (not at all)	0 times (not at all)	No
3.3	No	No	Yes	7 days (everyday)	Yes	10 to 19 days	No	0 times (not at all)	0 times (not at all)	No
3.3	No	No	Yes	7 days (everyday)	Yes	3 to 5 days	No	0 times (not at all)	0 times (not at all)	No
3.5	No	No	No	0 days (not at all)	No	1 or 2 days	No	0 times (not at all)	0 times (not at all)	No
3.8	No	No	No	1 day	Yes	0 days (not at all)	No	3 days	0 times (not at all)	No
4	No	No	No	1 day	No	3 to 5 days	No	0 times (not at all)	0 times (not at all)	No
3.34	No	No	No	1 day	Yes	3 to 5 days	Yes	0 times (not at all)	0 times (not at all)	No
3.8	No	No	Yes	0 days (not at all)	Yes	0 days (not at all)	Yes	0 times (not at all)	1 or 2 times	No
3.82	No	No	No	0 days (not at all)	No	10 to 19 days	No	0 times (not at all)	0 times (not at all)	No
3.8	No	No	No	0 days (not at all)	Yes	3 to 5 days	Yes	3 days	0 times (not at all)	No
3.6	No	No	No	0 days (not at all)	No	3 to 5 days	No	0 times (not at all)	0 times (not at all)	No
4	No	No	Yes	7 days (everyday)	Yes	1 or 2 days	Yes	0 times (not at all)	0 times (not at all)	Yes
3.7	No	No	No	1 day	Yes	0 days (not at all)	No	0 times (not at all)	0 times (not at all)	No
3.8	No	No	No	6 days	Yes	0 days (not at all)	No	6 days	0 times (not at all)	No
3.4	No	No	No	6 days	No	3 to 5 days	No	3 days	0 times (not at all)	No
3.67	No	No	No	0 days (not at all)	Yes	3 to 5 days	No	0 times (not at all)	0 times (not at all)	No
2.9	No	No	Yes	2 days	Yes	0 days (not at all)	Yes	3 days	0 times (not at all)	No
2.8	No	No	No	0 days (not at all)	No	1 or 2 days	No	0 times (not at all)	0 times (not at all)	No
0.57	No	No	No	0 days (not at all)	Yes	1 or 2 days	No	5 days	0 times (not at all)	No
2.5	No	No	Yes	5 days	Yes	1 or 2 days	Yes	0 times (not at all)	0 times (not at all)	No
3.31	No	No	Yes	5 days	Yes	1 or 2 days	Yes	0 times (not at all)	0 times (not at all)	No
3.5	No	No	No	5 days	No	0 days (not at all)	No	0 times (not at all)	0 times (not at all)	No
0.4	No	No	Yes	0 days (not at all)	Yes	1 or 2 days	Yes	0 times (not at all)	3 to 9 times	No
4	No	No	No	0 days (not at all)	No	1 or 2 days	No	0 times (not at all)	0 times (not at all)	No
1.9	No	No	Yes	2 days	Yes	3 to 5 days	Yes	1 day	0 times (not at all)	No
3.7	No	No	No	0 days (not at all)	Yes	3 to 5 days	Yes	6 days	1 or 2 times	Yes
3.5	No	No	No	1 day	No	1 or 2 days	No	0 times (not at all)	0 times (not at all)	No
2	No	No	No	0 days (not at all)	Yes	0 days (not at all)	Yes	0 times (not at all)	0 times (not at all)	No
4	No	Yes	No	7 days (everyday)	No	0 days (not at all)	No	7 days (everyday)	0 times (not at all)	No
4	No	No	No	1 day	Yes	0 days (not at all)	No	0 times (not at all)	0 times (not at all)	No
3.6	No	No	Yes	7 days (everyday)	Yes	1 or 2 days	Yes	0 times (not at all)	0 times (not at all)	No
4	No	No	No	7 days (everyday)	No	0 days (not at all)	No	0 times (not at all)	0 times (not at all)	No
4	No	No	No	7 days (everyday)	Yes	0 days (not at all)	No	0 times (not at all)	0 times (not at all)	No
3.9	No	No	No	0 days (not at all)	Yes	1 or 2 days	No	0 times (not at all)	0 times (not at all)	No
3.8	No	No	No	0 days (not at all)	No	1 or 2 days	No	0 times (not at all)	0 times (not at all)	No
4	No	No	No	0 days (not at all)	Yes	1 or 2 days	Yes	0 times (not at all)	0 times (not at all)	No
4	No	No	No	0 days (not at all)	Yes	1 or 2 days	Yes	0 times (not at all)	1 or 2 times	No
4	No	No	Yes	4 days	Yes	1 or 2 days	Yes	1 day	0 times (not at all)	No
4	No	No	No	0 days (not at all)	No	1 or 2 days	No	0 times (not at all)	0 times (not at all)	No
3.7	No	No	No	2 days	No	3 to 5 days	No	0 times (not at all)	0 times (not at all)	No
3.674	No		No		Yes	3 to 5 days	No	0 times (not at all)	0 times (not at all)	No
3.76	No		No		Yes	10 to 19 days	Yes	0 times (not at all)	0 times (not at all)	Yes
3.927	No		No		No	3 to 5 days	No	5 days	0 times (not at all)	No
3.36	No	No	No	0 days (not at all)	Yes	3 to 5 days	Yes	6 days	0 times (not at all)	Yes
3.4	No	No	No	0 days (not at all)	Yes	1 or 2 days	Yes	0 times (not at all)	0 times (not at all)	Yes
3.64	No	No	No	0 days (not at all)	Yes	1 or 2 days	No	1 day	0 times (not at all)	No
2.5	No	No	No	0 days (not at all)	Yes	0 days (not at all)	No	0 times (not at all)	0 times (not at all)	No
2.9	No	No	Yes	0 days (not at all)	Yes	6 to 9 days	Yes	0 times (not at all)	0 times (not at all)	No
3	No	No	No	0 days (not at all)	Yes	3 to 5 days	No	0 times (not at all)	0 times (not at all)	No
2.9	No	Yes	Yes	0 days (not at all)	Yes	6 to 9 days	No	0 times (not at all)	0 times (not at all)	No
3.902	No	Yes	No	0 days (not at all)	Yes	3 to 5 days	No	0 times (not at all)	0 times (not at all)	No
3.4	No	Yes	No	0 days (not at all)	No	3 to 5 days	No	0 times (not at all)	0 times (not at all)	No
3.97	No	Yes	No	0 days (not at all)	Yes	3 to 5 days	No	0 times (not at all)	0 times (not at all)	No
3.4	No	No	No	0 days (not at all)	Yes	1 or 2 days	Yes	0 times (not at all)	0 times (not at all)	No
3.81	No	No	No	0 days (not at all)	Yes	0 days (not at all)	No	0 times (not at all)	0 times (not at all)	No
3.44	No	No	No	7 days (everyday)	No	1 or 2 days	No	0 times (not at all)	0 times (not at all)	No
2.9	No	No	Yes	0 days (not at all)	Yes	3 to 5 days	Yes	4 days	0 times (not at all)	No
3.5	No	No	Yes	0 days (not at all)	Yes	0 days (not at all)	No	2 days	0 times (not at all)	No
3.4	No	No	Yes	0 days (not at all)	Yes	1 or 2 days	Yes	0 times (not at all)	0 times (not at all)	No
3.33	No	No	No	0 days (not at all)	Yes	1 or 2 days	No	0 times (not at all)	0 times (not at all)	No
3.64	No	No	No	0 days (not at all)	Yes	1 or 2 days	No	0 times (not at all)	0 times (not at all)	No
3.52	No	No	No	0 days (not at all)	Yes	0 days (not at all)	No	0 times (not at all)	0 times (not at all)	No
3.4	No	No	No	0 days (not at all)	No	3 to 5 days	No	0 times (not at all)	0 times (not at all)	No
3.5	No	No	Yes	0 days (not at all)	Yes	0 days (not at all)	No	0 times (not at all)	0 times (not at all)	No
4	No	No	No	1 day	Yes	0 days (not at all)	No	7 days (everyday)	0 times (not at all)	No
3.4	No	No	No	0 days (not at all)	No	10 to 19 days	No	0 times (not at all)	0 times (not at all)	No
3.29	No	No	No	1 day	Yes	1 or 2 days	Yes	1 day	0 times (not at all)	No
3	No	No	No	1 day	Yes	1 or 2 days	Yes	0 times (not at all)	0 times (not at all)	No
3.36	No	Yes	Yes	0 days (not at all)	Yes	10 to 19 days	No	0 times (not at all)	0 times (not at all)	No
2.4	No	Yes	No	0 days (not at all)	Yes	1 or 2 days	No	0 times (not at all)	0 times (not at all)	No
3.83	No	No	No	0 days (not at all)	Yes	1 or 2 days	Yes	5 days	0 times (not at all)	No
2.9	No	No	No	0 days (not at all)	Yes	1 or 2 days	No	5 days	0 times (not at all)	No
2.24	No	No	No	7 days (everyday)	Yes	20 to 29 days	Yes	5 days	0 times (not at all)	No
3.6	No	No	No	0 days (not at all)	Yes	1 or 2 days	Yes	0 times (not at all)	0 times (not at all)	No
3.8	No	No	Yes	0 days (not at all)	Yes	3 to 5 days	Yes	6 days	0 times (not at all)	No
3.6	No	No	No	0 days (not at all)	Yes	1 or 2 days	No	0 times (not at all)	40 or more times	No
3.5	No	No	Yes	0 days (not at all)	Yes	1 or 2 days	No	1 day	0 times (not at all)	No
3.6	No	No	Yes	0 days (not at all)	No	10 to 19 days	No	0 times (not at all)	0 times (not at all)	No
3.3	No	No	No	0 days (not at all)	Yes	0 days (not at all)	No	0 times (not at all)	0 times (not at all)	No
3.95	No	Yes	No	7 days (everyday)	No	3 to 5 days	No	3 days	0 times (not at all)	No
3.5	No	No	No	7 days (everyday)	Yes	1 or 2 days	No	0 times (not at all)	0 times (not at all)	No
3.5	No	No	No	7 days (everyday)	Yes	1 or 2 days	Yes	0 times (not at all)	0 times (not at all)	No
3.2	No	No	No	7 days (everyday)	Yes	1 or 2 days	Yes	0 times (not at all)	0 times (not at all)	No
3.75	No	No	No	7 days (everyday)	Yes	10 to 19 days	Yes	0 times (not at all)	0 times (not at all)	No
3.53	No	No	No	0 days (not at all)	Yes	0 days (not at all)	No	0 times (not at all)	0 times (not at all)	No
3.6	No	No	Yes	1 day	Yes	0 days (not at all)	Yes	7 days (everyday)	1 or 2 times	Yes
3.8	No	No	No	3 days	Yes	1 or 2 days	Yes	0 times (not at all)	0 times (not at all)	No
2.9	No	Yes	No	1 day	Yes	0 days (not at all)	No	1 day	0 times (not at all)	No
3.12	No	No	No	7 days (everyday)	Yes	0 days (not at all)	Yes	0 times (not at all)	0 times (not at all)	No
3.22	No	No	No	1 day	Yes	10 to 19 days	Yes	1 day	0 times (not at all)	No
3.45	No	No	No	0 days (not at all)	Yes	1 or 2 days	Yes	0 times (not at all)	0 times (not at all)	No
3	No	Yes	No	0 days (not at all)	No	0 days (not at all)	No	0 times (not at all)	0 times (not at all)	No
2.9	No	No	No	0 days (not at all)	Yes	6 to 9 days	Yes	0 times (not at all)	0 times (not at all)	No
3.6	No	No	No	0 days (not at all)	No	3 to 5 days	No	0 times (not at all)	0 times (not at all)	No
3.4	No	No	No	1 day	Yes	1 or 2 days	Yes	0 times (not at all)	0 times (not at all)	No
3.6	No	No	Yes	0 days (not at all)	Yes	0 days (not at all)	No	0 times (not at all)	0 times (not at all)	No
3.72	No	No	Yes	0 days (not at all)	Yes	1 or 2 days	Yes	3 days	0 times (not at all)	Yes
3.56	No	No	Yes	0 days (not at all)	Yes	20 to 29 days	Yes	0 times (not at all)	0 times (not at all)	No
3.3	No	No	Yes	0 days (not at all)	Yes	6 to 9 days	Yes	0 times (not at all)	0 times (not at all)	No
3.7	No	No	No	0 days (not at all)	Yes	1 or 2 days	No	0 times (not at all)	0 times (not at all)	No
3.49	No	No	No	0 days (not at all)	Yes	0 days (not at all)	No	0 times (not at all)	0 times (not at all)	No
3.8	No	No	No	0 days (not at all)	Yes	1 or 2 days	No	0 times (not at all)	0 times (not at all)	No
3.1	No	No	No	0 days (not at all)	No	1 or 2 days	No	7 days (everyday)	0 times (not at all)	No
2.7	No	No	No	0 days (not at all)	Yes	1 or 2 days	No	1 day	0 times (not at all)	No
3.8	No	No	Yes	4 days	Yes	10 to 19 days	Yes	6 days	0 times (not at all)	Yes
3.33	No	No	Yes	0 days (not at all)	Yes	1 or 2 days	No	0 times (not at all)	0 times (not at all)	No
2.87	No	No	No	3 days	Yes	1 or 2 days	No	3 days	0 times (not at all)	No
3.83	No	No	No	3 days	Yes	0 days (not at all)	Yes	0 times (not at all)	0 times (not at all)	No
2.28	No	No	No	1 day	Yes	6 to 9 days	No	3 days	0 times (not at all)	No
2.75	No	No	No	1 day	Yes	3 to 5 days	Yes	0 times (not at all)	0 times (not at all)	No
3.01	No	No	No	1 day	Yes	0 days (not at all)	No	0 times (not at all)	0 times (not at all)	No
3.5	No	No	No	0 days (not at all)	Yes	3 to 5 days	Yes	0 times (not at all)	0 times (not at all)	No
3.87	No	No	No	0 days (not at all)	No	3 to 5 days	No	0 times (not at all)	0 times (not at all)	No
3.04	No	No	No	0 days (not at all)	Yes	0 days (not at all)	No	0 times (not at all)	0 times (not at all)	No
3.44	No	No	No	1 day	No	0 days (not at all)	No	0 times (not at all)	0 times (not at all)	No
2.5	No	No	No	7 days (everyday)	Yes	1 or 2 days	No	7 days (everyday)	0 times (not at all)	No
3.1	No	No	No	7 days (everyday)	No	1 or 2 days	No	7 days (everyday)	0 times (not at all)	No
3.46	No	No	No	7 days (everyday)	Yes	0 days (not at all)	No	0 times (not at all)	0 times (not at all)	No
3.1	No	No	No	7 days (everyday)	Yes	1 or 2 days	Yes	3 days	0 times (not at all)	No
3.23	No	No	No	7 days (everyday)	No	1 or 2 days	No	3 days	0 times (not at all)	No
3.87	No	No	No	7 days (everyday)	Yes	1 or 2 days	No	7 days (everyday)	0 times (not at all)	No
3.26	No	No	No	6 days	Yes	0 days (not at all)	No	6 days	0 times (not at all)	No
3.5	No	No	No	0 days (not at all)	Yes	0 days (not at all)	No	0 times (not at all)	0 times (not at all)	No
4	No	No	No	0 days (not at all)	No	0 days (not at all)	No	0 times (not at all)	0 times (not at all)	No
3.04	No	No	Yes	2 days	Yes	0 days (not at all)	Yes	3 days	0 times (not at all)	No
3.7	No	No	Yes	0 days (not at all)	Yes	3 to 5 days	Yes	5 days	0 times (not at all)	No
3.94	No	No	No	0 days (not at all)	Yes	1 or 2 days	No	0 times (not at all)	0 times (not at all)	No
3.4	No	No	No	7 days (everyday)	No	10 to 19 days	No	7 days (everyday)	0 times (not at all)	No
3.49	No	No	No	7 days (everyday)	No	10 to 19 days	No	7 days (everyday)	0 times (not at all)	No
3.11	No	No	No	7 days (everyday)	No	10 to 19 days	No	7 days (everyday)	0 times (not at all)	No
3.2	No	No	No	1 day	Yes	3 to 5 days	Yes	0 times (not at all)	0 times (not at all)	No
3.49	No	No	No	1 day	Yes	1 or 2 days	No	0 times (not at all)	0 times (not at all)	No
3.01	No	No	Yes	0 days (not at all)	Yes	10 to 19 days	Yes	0 times (not at all)	0 times (not at all)	No
2.74	No	Yes	Yes	0 days (not at all)	Yes	1 or 2 days	No	0 times (not at all)	0 times (not at all)	No
3.5	No	Yes	Yes	0 days (not at all)	Yes	1 or 2 days	No	0 times (not at all)	0 times (not at all)	No
3.84	No	No	No	7 days (everyday)	No	3 to 5 days	No	7 days (everyday)	0 times (not at all)	No
3.15	No	No	No	7 days (everyday)	Yes	0 days (not at all)	No	0 times (not at all)	0 times (not at all)	No
3.81	No	No	No	4 days	No	0 days (not at all)	No	1 day	0 times (not at all)	No
3.7	No	No	No	4 days	No	3 to 5 days	No	0 times (not at all)	0 times (not at all)	No
3.8	No	No	No	1 day	Yes	0 days (not at all)	No	1 day	0 times (not at all)	No
2.9	No	No	No	0 days (not at all)	Yes	3 to 5 days	No	1 day	0 times (not at all)	No
3.4	No	No	No	0 days (not at all)	Yes	0 days (not at all)	No	0 times (not at all)	0 times (not at all)	No
3.5	No	No	No	7 days (everyday)	Yes	10 to 19 days	Yes	0 times (not at all)	0 times (not at all)	No
3.4	No	No	No	7 days (everyday)	Yes	1 or 2 days	Yes	0 times (not at all)	1 or 2 times	No
3.96	No	Yes	No	0 days (not at all)	Yes	10 to 19 days	Yes	0 times (not at all)	0 times (not at all)	No
3.97	No	No	No	7 days (everyday)	Yes	0 days (not at all)	No	5 days	0 times (not at all)	No
3.1	No	No	No	7 days (everyday)	Yes	1 or 2 days	No	5 days	0 times (not at all)	No
4	No	No	No	0 days (not at all)	No	0 days (not at all)	No	0 times (not at all)	0 times (not at all)	No
3.95	No	No	No	0 days (not at all)	Yes	3 to 5 days	No	0 times (not at all)	0 times (not at all)	No
4	No	No	No	0 days (not at all)	Yes	0 days (not at all)	No	0 times (not at all)	0 times (not at all)	No
4	No	No	No	0 days (not at all)	No	6 to 9 days	No	0 times (not at all)	0 times (not at all)	No
3.4	No	No	No	7 days (everyday)	No	3 to 5 days	No	1 day	0 times (not at all)	No
3.9	No	No	Yes	1 day	Yes	6 to 9 days	Yes	0 times (not at all)	0 times (not at all)	No
3.5	No	No	Yes	1 day	Yes	1 or 2 days	Yes	0 times (not at all)	0 times (not at all)	No
3.5	No	No	No	0 days (not at all)	Yes	1 or 2 days	No	0 times (not at all)	0 times (not at all)	No
3.92	No	No	No	0 days (not at all)	Yes	1 or 2 days	No	0 times (not at all)	0 times (not at all)	No
3.57	No	Yes	No	0 days (not at all)	Yes	6 to 9 days	Yes	0 times (not at all)	0 times (not at all)	No
3.8	No	No	No	7 days (everyday)	Yes	10 to 19 days	No	4 days	0 times (not at all)	No
3.2	No	No	No	2 days	Yes	10 to 19 days	Yes	2 days	0 times (not at all)	Yes
3.6	No	No	No	0 days (not at all)	Yes	1 or 2 days	Yes	0 times (not at all)	0 times (not at all)	No
3.61	No	No	No	3 days	Yes	3 to 5 days	Yes	0 times (not at all)	0 times (not at all)	No
3.84	No	No	No	0 days (not at all)	Yes	1 or 2 days	No	0 times (not at all)	0 times (not at all)	No
3.5	No	No	No	2 days	Yes	3 to 5 days	No	4 days	0 times (not at all)	No
3.92	No	Yes	No	7 days (everyday)	Yes	6 to 9 days	Yes	0 times (not at all)	0 times (not at all)	Yes
3.8	No	No	No	0 days (not at all)	Yes	0 days (not at all)	No	0 times (not at all)	0 times (not at all)	No
3.4	No	No	No	7 days (everyday)	Yes	0 days (not at all)	Yes	5 days	0 times (not at all)	No
3.2	No	No	No	1 day	Yes	0 days (not at all)	No	3 days	0 times (not at all)	No
2.75	No	No	No	7 days (everyday)	Yes	1 or 2 days	No	7 days (everyday)	0 times (not at all)	No
3.45	No	No	No	7 days (everyday)	Yes	1 or 2 days	No	3 days	0 times (not at all)	No
2.49	No	No	No	1 day	Yes	3 to 5 days	Yes	0 times (not at all)	0 times (not at all)	No
3.3	No	No	No	6 days	No	0 days (not at all)	No	6 days	0 times (not at all)	No
4.71	No	No	No	0 days (not at all)	Yes	3 to 5 days	No	5 days	0 times (not at all)	No
3.94	No	No	No	0 days (not at all)	Yes	1 or 2 days	No	0 times (not at all)	0 times (not at all)	No
3.92	No	No	Yes	1 day	Yes	1 or 2 days	No	0 times (not at all)	0 times (not at all)	No
3.86	No	No	No	7 days (everyday)	Yes	1 or 2 days	No	7 days (everyday)	0 times (not at all)	No
3.56	No	Yes	No	0 days (not at all)	Yes	3 to 5 days	No	0 times (not at all)	0 times (not at all)	No
2.9	No	Yes	No	0 days (not at all)	Yes	1 or 2 days	Yes	0 times (not at all)	0 times (not at all)	No
3.5	No	Yes	No	7 days (everyday)	Yes	0 days (not at all)	No	7 days (everyday)	0 times (not at all)	No
2.7	No	No	No	0 days (not at all)	Yes	1 or 2 days	Yes	0 times (not at all)	0 times (not at all)	No
2.5	No	No	No	2 days	Yes	1 or 2 days	No	2 days	0 times (not at all)	No
3.1	No	No	No	0 days (not at all)	Yes	1 or 2 days	No	0 times (not at all)	0 times (not at all)	No
3.67	No	No	Yes	7 days (everyday)	Yes	3 to 5 days	Yes	7 days (everyday)	0 times (not at all)	No
4	No	No	No	4 days	Yes	0 days (not at all)	No	1 day	0 times (not at all)	No
3.2	No	No	No	4 days	Yes	1 or 2 days	No	0 times (not at all)	0 times (not at all)	No
2.69	No	No	No	2 days	Yes	3 to 5 days	No	0 times (not at all)	0 times (not at all)	No
3.7	No		No		Yes	3 to 5 days	Yes	5 days	0 times (not at all)	No
3.6	No		No		No	3 to 5 days	No	1 day	0 times (not at all)	No
3.6	No		No		No	3 to 5 days	No	1 day	0 times (not at all)	No
4	No	No	No	0 days (not at all)	No	3 to 5 days	No	1 day	0 times (not at all)	No
3.5	No	No	No	0 days (not at all)	No	1 or 2 days	No	1 day	0 times (not at all)	No
3.6	No	No	No	3 days	No	3 to 5 days	No	0 times (not at all)	0 times (not at all)	No
3.1	No	No	No	3 days	Yes	1 or 2 days	Yes	0 times (not at all)	0 times (not at all)	No
2.9	No	No	Yes	7 days (everyday)	Yes	3 to 5 days	No	0 times (not at all)	0 times (not at all)	No
3.721	No	No	No	7 days (everyday)	Yes	1 or 2 days	Yes	0 times (not at all)	0 times (not at all)	No
3.45	No	No	No	1 day	Yes	1 or 2 days	Yes	0 times (not at all)	0 times (not at all)	No
3.6	No	No	No	1 day	Yes	6 to 9 days	No	0 times (not at all)	0 times (not at all)	No
3.61	No	No	Yes	0 days (not at all)	Yes	3 to 5 days	Yes	0 times (not at all)	0 times (not at all)	No
4	No	No	Yes	0 days (not at all)	Yes	0 days (not at all)	No	3 days	0 times (not at all)	No
3.4	No	No	No	0 days (not at all)	No	0 days (not at all)	No	3 days	0 times (not at all)	No
3.36	No	No	Yes	0 days (not at all)	Yes	3 to 5 days	No	3 days	0 times (not at all)	No
3.41	No	No	No	0 days (not at all)	Yes	1 or 2 days	No	3 days	0 times (not at all)	No
3.85	No	No	No	0 days (not at all)	No	1 or 2 days	No	3 days	0 times (not at all)	No
3.78	No	Yes	Yes	0 days (not at all)	Yes	10 to 19 days	Yes	0 times (not at all)	0 times (not at all)	No
3.9	No	Yes	Yes	0 days (not at all)	Yes	3 to 5 days	No	0 times (not at all)	1 or 2 times	No
3.25	No	No	No	0 days (not at all)	Yes	0 days (not at all)	No	0 times (not at all)	0 times (not at all)	No
3.8	No	No	No	0 days (not at all)	No	1 or 2 days	No	0 times (not at all)	0 times (not at all)	No
3.5	No	No	No	0 days (not at all)	No	1 or 2 days	No	0 times (not at all)	0 times (not at all)	No
3.8	No	No	No	7 days (everyday)	Yes	6 to 9 days	No	0 times (not at all)	0 times (not at all)	No
3.3	No	No	No	0 days (not at all)	Yes	1 or 2 days	No	0 times (not at all)	0 times (not at all)	No
3.6	No	No	Yes	0 days (not at all)	Yes	1 or 2 days	Yes	0 times (not at all)	0 times (not at all)	No
3.78	No	No	Yes	0 days (not at all)	Yes	0 days (not at all)	No	5 days	0 times (not at all)	No
2.6	No	No	No	0 days (not at all)	No	1 or 2 days	No	0 times (not at all)	0 times (not at all)	No
3.8	No	No	Yes	0 days (not at all)	Yes	3 to 5 days	Yes	0 times (not at all)	0 times (not at all)	No
3.83	No	Yes	No	1 day	Yes	1 or 2 days	No	0 times (not at all)	0 times (not at all)	No
3.4	No	No	No	3 days	Yes	3 to 5 days	No	3 days	0 times (not at all)	No
2.52	No	No	No	7 days (everyday)	Yes	0 days (not at all)	Yes	3 days	0 times (not at all)	No
3.78	No	No	No	1 day	Yes	1 or 2 days	No	7 days (everyday)	0 times (not at all)	No
3.06	No	No	Yes	0 days (not at all)	Yes	10 to 19 days	Yes	0 times (not at all)	0 times (not at all)	No
3.893	No	No	No	1 day	No	1 or 2 days	No	0 times (not at all)	0 times (not at all)	No
3.2	No	No	Yes	0 days (not at all)	Yes	1 or 2 days	Yes	0 times (not at all)	0 times (not at all)	No
3.3	No	Yes	Yes	0 days (not at all)	Yes	1 or 2 days	Yes	5 days	1 or 2 times	Yes
3.9	No	Yes	No	0 days (not at all)	No	10 to 19 days	No	0 times (not at all)	0 times (not at all)	No
4	No	Yes	No	0 days (not at all)	Yes	1 or 2 days	Yes	0 times (not at all)	0 times (not at all)	No
3.2	No	Yes	No	0 days (not at all)	Yes	10 to 19 days	No	0 times (not at all)	0 times (not at all)	No
3.78	No	Yes	No	0 days (not at all)	Yes	1 or 2 days	Yes	0 times (not at all)	0 times (not at all)	No
2.8	No	Yes	No	0 days (not at all)	Yes	1 or 2 days	No	0 times (not at all)	0 times (not at all)	No
2.89	No	Yes	Yes	0 days (not at all)	No	1 or 2 days	No	0 times (not at all)	0 times (not at all)	No
2	No	No	Yes	0 days (not at all)	Yes	3 to 5 days	Yes	0 times (not at all)	0 times (not at all)	No
3.31	No	No	Yes	0 days (not at all)	Yes	6 to 9 days	No	0 times (not at all)	0 times (not at all)	No
4	No	No	No	0 days (not at all)	Yes	0 days (not at all)	No	0 times (not at all)	0 times (not at all)	No
3.4	No	No	No	0 days (not at all)	No	3 to 5 days	No	0 times (not at all)	0 times (not at all)	No
4	No	No	No	0 days (not at all)	Yes	1 or 2 days	Yes	0 times (not at all)	0 times (not at all)	No
3.3	No	No	No	0 days (not at all)	Yes	10 to 19 days	No	6 days	0 times (not at all)	No
2.7	No	Yes	No	7 days (everyday)	No	6 to 9 days	No	0 times (not at all)	0 times (not at all)	No
3.25	No	No	No	7 days (everyday)	Yes	1 or 2 days	No	0 times (not at all)	0 times (not at all)	No
3.5	No	No	No	1 day	Yes	3 to 5 days	No	1 day	0 times (not at all)	No
3.24	No	Yes	No	7 days (everyday)	Yes	6 to 9 days	No	3 days	0 times (not at all)	No
3.7	No	No	Yes	3 days	Yes	3 to 5 days	Yes	0 times (not at all)	0 times (not at all)	No
3.47	No	No	No	0 days (not at all)	Yes	0 days (not at all)	No	0 times (not at all)	0 times (not at all)	No
3	No	No	No	0 days (not at all)	Yes	0 days (not at all)	No	0 times (not at all)	0 times (not at all)	No
3	No	No	No	0 days (not at all)	Yes	10 to 19 days	Yes	1 day	0 times (not at all)	No
3.1	No	No	No	0 days (not at all)	Yes	1 or 2 days	Yes	0 times (not at all)	0 times (not at all)	No
3.532	No	Yes	Yes	0 days (not at all)	Yes	1 or 2 days	Yes	0 times (not at all)	0 times (not at all)	No
3.6	No	Yes	No	0 days (not at all)	Yes	0 days (not at all)	No	0 times (not at all)	0 times (not at all)	No
3.5	No	Yes	No	0 days (not at all)	No	1 or 2 days	No	0 times (not at all)	0 times (not at all)	No
3.5	No	Yes	No	0 days (not at all)	Yes	0 days (not at all)	No	0 times (not at all)	0 times (not at all)	No
3.85	No	No	No	1 day	No	1 or 2 days	No	0 times (not at all)	0 times (not at all)	No
3.6	No	No	No	7 days (everyday)	Yes	1 or 2 days	Yes	6 days	0 times (not at all)	Yes
3.5	No	No	No	7 days (everyday)	No	0 days (not at all)	No	6 days	0 times (not at all)	No
3.89	No	No	Yes	0 days (not at all)	Yes	1 or 2 days	No	3 days	0 times (not at all)	No
4	No	No	Yes	0 days (not at all)	Yes	0 days (not at all)	Yes	0 times (not at all)	20 to 39 times	No
3.5	No	No	No	0 days (not at all)	No	1 or 2 days	No	0 times (not at all)	0 times (not at all)	No
3.7	No	No	No	2 days	Yes	6 to 9 days	No	0 times (not at all)	0 times (not at all)	No
3.16	No	No	No	0 days (not at all)	Yes	6 to 9 days	Yes	4 days	0 times (not at all)	No
3.24	No	No	No	0 days (not at all)	Yes	6 to 9 days	No	4 days	0 times (not at all)	No
3.37	No	Yes	No	7 days (everyday)	Yes	6 to 9 days	Yes	0 times (not at all)	0 times (not at all)	No
3.4	No	Yes	No	0 days (not at all)	No	6 to 9 days	No	0 times (not at all)	0 times (not at all)	No
3.7	No	Yes	Yes	5 days	Yes	0 days (not at all)	Yes	5 days	0 times (not at all)	No
3.6	No	No	No	0 days (not at all)	Yes	3 to 5 days	No	0 times (not at all)	0 times (not at all)	No
3.9	No	No	No	0 days (not at all)	Yes	10 to 19 days	Yes	7 days (everyday)	0 times (not at all)	Yes
4	No	No	Yes	3 days	Yes	6 to 9 days	No	7 days (everyday)	0 times (not at all)	No
3	No	No	Yes	0 days (not at all)	Yes	1 or 2 days	Yes	0 times (not at all)	0 times (not at all)	No
3.1	No	No	No	0 days (not at all)	Yes	0 days (not at all)	No	0 times (not at all)	0 times (not at all)	No
3.56	No	No	No	7 days (everyday)	Yes	0 days (not at all)	Yes	5 days	0 times (not at all)	No
3.97	No	No	No	7 days (everyday)	Yes	1 or 2 days	No	5 days	0 times (not at all)	No
4	No	No	No	7 days (everyday)	Yes	0 days (not at all)	No	5 days	0 times (not at all)	No
2.48	No	No	No	3 days	Yes	1 or 2 days	Yes	0 times (not at all)	0 times (not at all)	No
3.01	No	No	No	3 days	Yes	1 or 2 days	Yes	3 days	0 times (not at all)	Yes
3.3	No	No	Yes	0 days (not at all)	Yes	1 or 2 days	Yes	0 times (not at all)	0 times (not at all)	No
3.53	No	No	No	0 days (not at all)	Yes	1 or 2 days	Yes	0 times (not at all)	0 times (not at all)	No
3.5	No	No	Yes	1 day	Yes	3 to 5 days	Yes	3 days	0 times (not at all)	Yes
2.9	No	No	No	1 day	Yes	0 days (not at all)	No	3 days	0 times (not at all)	No
3.8	No	No	No	1 day	No	6 to 9 days	No	3 days	0 times (not at all)	No
2.48	No	No	No	1 day	Yes	3 to 5 days	No	0 times (not at all)	0 times (not at all)	No
2.9	No	No	No	1 day	Yes	3 to 5 days	Yes	0 times (not at all)	0 times (not at all)	No
3.91	No	No	No	0 days (not at all)	Yes	1 or 2 days	No	0 times (not at all)	0 times (not at all)	No
4	No	No	No	0 days (not at all)	Yes	0 days (not at all)	Yes	0 times (not at all)	0 times (not at all)	No
3.8	No	No	No	7 days (everyday)	Yes	1 or 2 days	Yes	7 days (everyday)	0 times (not at all)	No
2.7	No	No	No	7 days (everyday)	Yes	1 or 2 days	No	7 days (everyday)	0 times (not at all)	No
3.5	No	No	No	7 days (everyday)	Yes	0 days (not at all)	No	0 times (not at all)	0 times (not at all)	No
3.8	No	No	No	7 days (everyday)	Yes	3 to 5 days	No	3 days	0 times (not at all)	No
3.75	No	No	No	7 days (everyday)	No	1 or 2 days	No	3 days	0 times (not at all)	No
3.8	No	No	No	7 days (everyday)	No	1 or 2 days	No	3 days	0 times (not at all)	No
2.8	No	No	No	0 days (not at all)	Yes	1 or 2 days	No	0 times (not at all)	0 times (not at all)	No
3.7	No	No	Yes	0 days (not at all)	Yes	1 or 2 days	Yes	0 times (not at all)	0 times (not at all)	No
3.477	No	No	No	0 days (not at all)	Yes	1 or 2 days	Yes	0 times (not at all)	0 times (not at all)	No
3.46	No	No	No	0 days (not at all)	No	1 or 2 days	No	0 times (not at all)	0 times (not at all)	No
3.77	No	No	No	0 days (not at all)	No	1 or 2 days	No	0 times (not at all)	0 times (not at all)	No
3.5	No	No	No	1 day	No	1 or 2 days	No	0 times (not at all)	0 times (not at all)	No
3.5	No	Yes	No	0 days (not at all)	Yes	1 or 2 days	Yes	0 times (not at all)	0 times (not at all)	No
2.8	No	Yes	Yes	7 days (everyday)	Yes	1 or 2 days	Yes	7 days (everyday)	0 times (not at all)	No
4	No	No	Yes	1 day	Yes	1 or 2 days	Yes	0 times (not at all)	3 to 9 times	No
4	No	No	No	7 days (everyday)	No	1 or 2 days	No	0 times (not at all)	0 times (not at all)	No
3.6	No	No	No	0 days (not at all)	Yes	1 or 2 days	Yes	0 times (not at all)	0 times (not at all)	No
3.4	No	No	No	7 days (everyday)	Yes	10 to 19 days	No	7 days (everyday)	0 times (not at all)	No
2.05	No	No	Yes	1 day	Yes	1 or 2 days	Yes	0 times (not at all)	0 times (not at all)	No
3.235	No	No	Yes	0 days (not at all)	Yes	0 days (not at all)	Yes	0 times (not at all)	0 times (not at all)	No
3.6	No	No	Yes	0 days (not at all)	Yes	0 days (not at all)	Yes	0 times (not at all)	0 times (not at all)	No
2.9	No	No	No	4 days	No	0 days (not at all)	No	1 day	0 times (not at all)	No
3.94	No		No		No	10 to 19 days	No	0 times (not at all)	0 times (not at all)	No
3	No		No		Yes	0 days (not at all)	Yes	1 day	3 to 9 times	Yes
3.47	No		No		No	3 to 5 days	No	1 day	0 times (not at all)	No
3.1	No	No	No	0 days (not at all)	No	3 to 5 days	No	5 days	0 times (not at all)	No
3.2	No	No	No	0 days (not at all)	No	1 or 2 days	No	0 times (not at all)	0 times (not at all)	No
3.1	No	No	Yes	0 days (not at all)	Yes	0 days (not at all)	Yes	0 times (not at all)	0 times (not at all)	No
3.7	No	No	No	1 day	Yes	0 days (not at all)	No	5 days	0 times (not at all)	No
3	No	Yes	No	0 days (not at all)	Yes	1 or 2 days	No	0 times (not at all)	0 times (not at all)	No
3.4	No	No	No	0 days (not at all)	Yes	1 or 2 days	No	0 times (not at all)	0 times (not at all)	No
3.7	No	No	Yes	0 days (not at all)	Yes	0 days (not at all)	No	0 times (not at all)	0 times (not at all)	No
3	No	No	Yes	0 days (not at all)	Yes	1 or 2 days	No	1 day	0 times (not at all)	No
4	No	No	No	1 day	No	10 to 19 days	No	0 times (not at all)	0 times (not at all)	No
4	No	No	Yes	0 days (not at all)	Yes	1 or 2 days	Yes	0 times (not at all)	0 times (not at all)	Yes
3.89	No	Yes	No	0 days (not at all)	No	6 to 9 days	No	0 times (not at all)	0 times (not at all)	No
3	No	No	No	7 days (everyday)	No	1 or 2 days	No	6 days	0 times (not at all)	No
3.8	No	No	No	7 days (everyday)	No	0 days (not at all)	No	6 days	0 times (not at all)	No
3.7	No	No	Yes	7 days (everyday)	Yes	6 to 9 days	Yes	3 days	3 to 9 times	Yes
3.75	No	No	No	0 days (not at all)	No	3 to 5 days	No	0 times (not at all)	0 times (not at all)	No
3	No	No	No	0 days (not at all)	Yes	1 or 2 days	No	0 times (not at all)	0 times (not at all)	No
3	No	No	Yes	3 days	Yes	1 or 2 days	Yes	7 days (everyday)	0 times (not at all)	No
3.4	No	No	No	2 days	No	1 or 2 days	No	0 times (not at all)	0 times (not at all)	No
4	No	No	No	2 days	No	1 or 2 days	No	0 times (not at all)	0 times (not at all)	No
3.3	No	No	No	2 days	No	6 to 9 days	No	0 times (not at all)	0 times (not at all)	No
3.4	No	No	No	1 day	Yes	0 days (not at all)	No	0 times (not at all)	0 times (not at all)	No
3	No	No	No	0 days (not at all)	No	1 or 2 days	No	1 day	0 times (not at all)	No
4	No	No	No	0 days (not at all)	No	1 or 2 days	No	1 day	0 times (not at all)	No
4	No	Yes	No	0 days (not at all)	No	6 to 9 days	No	0 times (not at all)	0 times (not at all)	No
3.9	No	Yes	No	5 days	Yes	3 to 5 days	No	5 days	0 times (not at all)	No
3.15	No	No	No	0 days (not at all)	No	3 to 5 days	No	0 times (not at all)	0 times (not at all)	No
3.23	No	No	Yes	3 days	Yes	1 or 2 days	No	0 times (not at all)	0 times (not at all)	No
3.5	No	No	No	0 days (not at all)	Yes	0 days (not at all)	Yes	0 times (not at all)	0 times (not at all)	No
2.67	No	No	Yes	7 days (everyday)	Yes	0 days (not at all)	Yes	6 days	0 times (not at all)	No
3.575	No	No	No	7 days (everyday)	Yes	1 or 2 days	No	3 days	0 times (not at all)	No
3.5	No	No	Yes	6 days	Yes	1 or 2 days	Yes	6 days	0 times (not at all)	No
3.67	No	No	Yes	0 days (not at all)	Yes	1 or 2 days	Yes	0 times (not at all)	0 times (not at all)	No
3.51	No		No		Yes	10 to 19 days	Yes	0 times (not at all)	0 times (not at all)	No
2.8	No		No		No	10 to 19 days	No	0 times (not at all)	0 times (not at all)	No
3.7	No		No		Yes	3 to 5 days	No	1 day	0 times (not at all)	No
3.3	No	No	No	0 days (not at all)	Yes	6 to 9 days	Yes	0 times (not at all)	0 times (not at all)	No
3.3	No	No	Yes	0 days (not at all)	Yes	10 to 19 days	Yes	1 day	0 times (not at all)	Yes
2.8	No	No	No	0 days (not at all)	Yes	10 to 19 days	No	6 days	0 times (not at all)	No
3.65	No	No	No	7 days (everyday)	Yes	10 to 19 days	Yes	1 day	0 times (not at all)	Yes
3.4	No	No	Yes	1 day	Yes	10 to 19 days	Yes	0 times (not at all)	0 times (not at all)	No
3.72	No	No	No	1 day	Yes	1 or 2 days	Yes	0 times (not at all)	0 times (not at all)	No
3	No	No	No	1 day	Yes	10 to 19 days	Yes	1 day	0 times (not at all)	No
3	No	No	No	1 day	Yes	10 to 19 days	Yes	1 day	0 times (not at all)	No
3	No	No	No	0 days (not at all)	Yes	1 or 2 days	No	0 times (not at all)	0 times (not at all)	No
3.3	No	No	Yes	2 days	Yes	1 or 2 days	Yes	0 times (not at all)	0 times (not at all)	No
3.12	No	No	No	3 days	Yes	1 or 2 days	Yes	0 times (not at all)	0 times (not at all)	No
3.84	No	No	No	7 days (everyday)	No	1 or 2 days	No	3 days	0 times (not at all)	No
2.92	No	No	No	7 days (everyday)	Yes	0 days (not at all)	Yes	0 times (not at all)	20 to 39 times	No
3.6	No	No	No	6 days	Yes	0 days (not at all)	No	6 days	0 times (not at all)	No
3.26	No	No	No	0 days (not at all)	No	1 or 2 days	Yes	0 times (not at all)	0 times (not at all)	Yes
4	No	No	No	0 days (not at all)	No	3 to 5 days	No	6 days	0 times (not at all)	No
3.487	No	No	No	0 days (not at all)	Yes	1 or 2 days	Yes	0 times (not at all)	0 times (not at all)	No
2.7	No	No	Yes	7 days (everyday)	Yes	10 to 19 days	Yes	7 days (everyday)	3 to 9 times	Yes
3.2	No	No	No	0 days (not at all)	Yes	1 or 2 days	Yes	0 times (not at all)	0 times (not at all)	No
3.46	No	No	No	0 days (not at all)	No	1 or 2 days	Yes	0 times (not at all)	0 times (not at all)	Yes
3.94	No	No	Yes	0 days (not at all)	Yes	10 to 19 days	Yes	7 days (everyday)	1 or 2 times	Yes
2.9	No	No	No	1 day	Yes	0 days (not at all)	No	0 times (not at all)	0 times (not at all)	No
3.8	No	No	No	7 days (everyday)	Yes	1 or 2 days	No	7 days (everyday)	0 times (not at all)	No
3.94	No	No	No	2 days	Yes	1 or 2 days	No	2 days	0 times (not at all)	No
3.24	No	No	No	1 day	Yes	3 to 5 days	Yes	0 times (not at all)	0 times (not at all)	No
3.9	No	No	No	5 days	No	6 to 9 days	No	7 days (everyday)	0 times (not at all)	No
3.72	No	No	Yes	0 days (not at all)	Yes	1 or 2 days	Yes	0 times (not at all)	0 times (not at all)	No
4	No		No		No	10 to 19 days	No	0 times (not at all)	0 times (not at all)	No
3	No	No	No	0 days (not at all)	Yes	0 days (not at all)	No	0 times (not at all)	0 times (not at all)	No
3.5	No	No	No	0 days (not at all)	Yes	0 days (not at all)	Yes	0 times (not at all)	0 times (not at all)	No
2.9	No	No	No	7 days (everyday)	No	1 or 2 days	No	0 times (not at all)	0 times (not at all)	No
3.45	No	No	No	7 days (everyday)	Yes	6 to 9 days	No	0 times (not at all)	0 times (not at all)	No
3.5	No	No	No	7 days (everyday)	Yes	3 to 5 days	No	3 days	0 times (not at all)	No
3.1	No	No	No	0 days (not at all)	Yes	0 days (not at all)	No	0 times (not at all)	0 times (not at all)	No
3.75	No	No	No	0 days (not at all)	No	0 days (not at all)	No	0 times (not at all)	0 times (not at all)	No
3.49	No	No	No	6 days	Yes	3 to 5 days	Yes	3 days	0 times (not at all)	No
3.82	No	Yes	No	0 days (not at all)	Yes	1 or 2 days	No	0 times (not at all)	0 times (not at all)	No
3.2	No	No	No	2 days	No	1 or 2 days	No	2 days	0 times (not at all)	No
3	No	No	No	7 days (everyday)	Yes	1 or 2 days	No	7 days (everyday)	0 times (not at all)	No
4	No	No	No	2 days	No	3 to 5 days	No	0 times (not at all)	0 times (not at all)	No
3.98	No		No		No	3 to 5 days	No	0 times (not at all)	0 times (not at all)	No
2.7	No	No	Yes	7 days (everyday)	Yes	1 or 2 days	Yes	3 days	0 times (not at all)	No
2.6	No	No	No	2 days	No	3 to 5 days	No	6 days	0 times (not at all)	No
3.73	No	No	No	0 days (not at all)	Yes	6 to 9 days	Yes	0 times (not at all)	0 times (not at all)	No
3.76	No	No	Yes	7 days (everyday)	Yes	0 days (not at all)	No	0 times (not at all)	3 to 9 times	No
3.67	No	No	No	0 days (not at all)	Yes	3 to 5 days	No	0 times (not at all)	0 times (not at all)	No
3.668	No	No	Yes	0 days (not at all)	Yes	3 to 5 days	Yes	0 times (not at all)	0 times (not at all)	No
2.6	No	Yes	No	0 days (not at all)	No	6 to 9 days	No	0 times (not at all)	0 times (not at all)	No
2.68	No	Yes	No	0 days (not at all)	Yes	0 days (not at all)	No	0 times (not at all)	0 times (not at all)	No
2.7	No	No	Yes	0 days (not at all)	No	1 or 2 days	No	0 times (not at all)	0 times (not at all)	No
3.05	No	No	No	7 days (everyday)	Yes	0 days (not at all)	No	0 times (not at all)	0 times (not at all)	No
3.4	No	No	Yes	0 days (not at all)	Yes	6 to 9 days	Yes	0 times (not at all)	0 times (not at all)	Yes
3.5	No	No	Yes	1 day	Yes	1 or 2 days	Yes	0 times (not at all)	0 times (not at all)	No
3.9	No	No	No	1 day	Yes	1 or 2 days	No	0 times (not at all)	0 times (not at all)	No
3.76	No	No	Yes	0 days (not at all)	Yes	1 or 2 days	Yes	0 times (not at all)	0 times (not at all)	No
3.5	No	No	No	7 days (everyday)	Yes	0 days (not at all)	No	6 days	0 times (not at all)	No
2.68	No	No	No	0 days (not at all)	Yes	0 days (not at all)	No	0 times (not at all)	0 times (not at all)	No
3.9	No	No	Yes	0 days (not at all)	Yes	1 or 2 days	No	0 times (not at all)	0 times (not at all)	No
2.8	No	No	No	3 days	Yes	1 or 2 days	No	7 days (everyday)	0 times (not at all)	No
2.8	No	No	Yes	0 days (not at all)	Yes	1 or 2 days	No	7 days (everyday)	0 times (not at all)	No
3.09	No	No	Yes	0 days (not at all)	Yes	10 to 19 days	Yes	1 day	0 times (not at all)	No
2.8	No	Yes	Yes	0 days (not at all)	Yes	3 to 5 days	No	0 times (not at all)	0 times (not at all)	No
2.5	No	Yes	No	5 days	Yes	3 to 5 days	No	5 days	0 times (not at all)	No
2.45	No	No	Yes	7 days (everyday)	Yes	3 to 5 days	Yes	0 times (not at all)	0 times (not at all)	No
2.79	No	No	No	0 days (not at all)	Yes	1 or 2 days	No	0 times (not at all)	0 times (not at all)	No
3	No	No	No	0 days (not at all)	Yes	1 or 2 days	No	5 days	0 times (not at all)	No
3.94	No	No	No	0 days (not at all)	No	1 or 2 days	No	0 times (not at all)	0 times (not at all)	No
3.76	No	No	No	1 day	Yes	0 days (not at all)	No	0 times (not at all)	0 times (not at all)	No
3.63	No	No	Yes	2 days	Yes	0 days (not at all)	Yes	2 days	0 times (not at all)	No
3.5	No	No	No	0 days (not at all)	No	1 or 2 days	Yes	1 day	0 times (not at all)	No
2.89	No	No	No	7 days (everyday)	Yes	10 to 19 days	No	7 days (everyday)	0 times (not at all)	No
3.23	No	No	No	4 days	No	0 days (not at all)	No	1 day	0 times (not at all)	No
